# Supplementary material for: Proteome-wide Mendelian randomization identifies circulating proteins causally associated with childhood obesity
Source: Research Square preprint supplement (doi:10.21203/rs.3.rs-6189469/v1), 2025-04-21
Supplement: Supplementary file 2 [file 5de8aa01ce0d2cd3c406ebbe.xlsx]

## Sheet: S1
Table S1. Information on genotyping, proteomic platform and imputation panel for the six proteomic GWAS , the GWAS for BMI (adult and childhood ) and the GWAS for BF%
Study	Genotyping Platform	Sample size of the GWAS	Mean age of participants	Ethnicity	Proteomic platform/proteomic measurements	*MAF	Imputation reference pannel
Proteomic GWAS
Sun et al. UKB	Illumina	502414	56.5	Trans-ethnic	Olink platform	> 1%	TopMed
Emilsson et al.	Affymetrix, Illumina	3200	65	Icelander	multiplexed aptamer-based affinity proteomics	> 5%
Folkersen et al.	Affymetrix, Illumina	21758		European	Olink platform	> 5%	1000 Genomes or HRC
Suhre et al.	Affymetrix Axiom	1000	[32–81]	European	multiplexed aptamer-based affinity proteomics	> 5%
Niu et al.	Illumina	2147	[5–20]	European	Olink platform	> 5%
Ferkingstad et al.	Illumina	35559	55	Icelander	SomaScan multiplex aptamer assay (version 4)	< 1%	1000 Genomes
Childhood BMI GWAS
Vogelezang et al.	GWAS meta-analysis of 26 studies (multiple arrays)	39620	[2-10]	European	N/A	>1%	1000 Genomes or HRC
Adult BMI GWAS
Yengo et al.	GWAS meta-analysis of GIANT and UKB (multiple arrays)	693529,		European	N/A	>1%	HapMap 2
Adult BF% GWAS
Hübel et al.	GWAS meta-analysis of UKB	155961	54.9 ± 8.1	European	N/A	> 1%	1000 Genomes or HRC
* MAF denotes to minor allele frequency before imputation
N/A denotes to not available

## Sheet: S2-MR-BMI 
Table S2. Two sample MR harmonization and results for BMI using directly matched cis-pQTL. Red font highlights the FDR correction cut-off
SNP	Outcome	Protein	Study	Method	Number.SNPs	MR Beta	MR SE	MR Pval	FDR	effect_allele.exposure	other_allele.exposure	effect_allele.outcome	other_allele.outcome	beta.exposure	beta.outcome	eaf.exposure	eaf.outcome	remove	palindromic	ambiguous	id.outcome	pval.outcome	se.outcome	outcome	mr_keep.outcome	pval_origin.outcome	pval.exposure	se.exposure	exposure	mr_keep.exposure	pval_origin.exposure	action	mr_keep	samplesize.outcome
rs11215406	BMI	Nectin-like protein 2	Ferkingstad	Wald ratio	1	-0.260667	0.0573333	5.45424e-06	0.00291802	C	T	C	T	0.15	-0.0391			FALSE	FALSE	FALSE	BMI	4.788e-06	0.0086	outcome	TRUE	reported	1.14815e-68	0.00856526	exposure	TRUE	reported	2	TRUE	39715
rs651007	BMI	ENG	Suhre	Wald ratio	1	-0.0716418	0.0175373	4.40566e-05	0.0117851	C	T	C	T	-0.536	0.0384	0.23		FALSE	FALSE	FALSE	BMI	4.454e-05	0.0094	outcome	TRUE	reported	6e-26	0.049	exposure	TRUE	reported	2	TRUE	36963
rs77878271	BMI	FABP4	Folkersen	Wald ratio	1	-0.331923	0.0869231	0.00013422	0.0239359	A	G	A	G	0.26	-0.0863			FALSE	FALSE	FALSE	BMI	0.0001376	0.0226	outcome	TRUE	reported	6.4e-14	0.035	exposure	TRUE	reported	2	TRUE	38668
rs1042579	BMI	TM	Folkersen	Wald ratio	1	-0.081	0.02475	0.00106515	0.142464	A	G	A	G	0.4	-0.0324			FALSE	FALSE	FALSE	BMI	0.001014	0.0099	outcome	TRUE	reported	1e-200	0.013	exposure	TRUE	reported	2	TRUE	36206
rs35550815	BMI	CASP-8	Folkersen	Wald ratio	1	-0.180526	0.0605263	0.00285803	0.169894	A	G	A	G	-0.19	0.0343			FALSE	FALSE	FALSE	BMI	0.002821	0.0115	outcome	TRUE	reported	6e-26	0.018	exposure	TRUE	reported	2	TRUE	39618
rs2530226	BMI	CD14	Niu	Inverse variance weighted	2	-0.0887365	0.0290539	0.00225662	0.169894	T	C	T	C	-0.224992	0.0122			FALSE	FALSE	FALSE	BMI	0.1245	0.008	outcome	TRUE	reported	1.5324e-12	0.0316041	exposure	TRUE	reported	2	TRUE	37210
rs4687552	BMI	ITIH4	Niu	Inverse variance weighted	5	-0.0413948	0.0137203	0.00255248	0.169894	T	C	T	C	0.413783	-0.0172			FALSE	FALSE	FALSE	BMI	0.02866	0.0079	outcome	TRUE	reported	4.05226e-36	0.0322921	exposure	TRUE	reported	2	TRUE	39618
rs634501	BMI	MGAT1	Ferkingstad	Wald ratio	1	0.618333	0.206667	0.00277215	0.169894	A	G	A	G	-0.06	-0.0371			FALSE	FALSE	FALSE	BMI	0.002874	0.0124	outcome	TRUE	reported	2.81838e-12	0.008588	exposure	TRUE	reported	2	TRUE	30966
rs3094005	BMI	MICB	Suhre	Wald ratio	1	0.041246	0.0135338	0.00230662	0.169894	G	T	G	T	-0.931	-0.0384	0.09		FALSE	FALSE	FALSE	BMI	0.00237	0.0126	outcome	TRUE	reported	4.2e-38	0.069	exposure	TRUE	reported	2	TRUE	36393
rs11553746	BMI	ACP1	Suhre	Wald ratio	1	0.0181083	0.00662894	0.00630071	0.337088	C	T	C	T	1.237	0.0224	0.33		FALSE	FALSE	FALSE	BMI	0.005991	0.0082	outcome	TRUE	reported	1e-200	0.026	exposure	TRUE	reported	2	TRUE	37506
rs3759562	BMI	CINP	Ferkingstad	Wald ratio	1	0.388333	0.146667	0.00810349	0.384423	G	A	G	A	-0.06	-0.0233			FALSE	FALSE	FALSE	BMI	0.008232	0.0088	outcome	TRUE	reported	4.89779e-10	0.00964267	exposure	TRUE	reported	2	TRUE	37210
rs870801	BMI	SAR1A	Ferkingstad	Wald ratio	1	0.131333	0.05	0.00862258	0.384423	A	C	A	C	0.15	0.0197			FALSE	FALSE	FALSE	BMI	0.009164	0.0075	outcome	TRUE	reported	5.62341e-73	0.00830165	exposure	TRUE	reported	2	TRUE	39723
rs13178668	BMI	FER	Ferkingstad	Wald ratio	1	-0.25	0.0975	0.0103443	0.3953	G	A	G	A	0.08	-0.02			FALSE	FALSE	FALSE	BMI	0.01	0.0078	outcome	TRUE	reported	1.38038e-19	0.00883604	exposure	TRUE	reported	2	TRUE	39618
rs6011275	BMI	TCEA2	Ferkingstad	Wald ratio	1	0.158571	0.0614286	0.00984018	0.3953	G	T	G	T	-0.14	-0.0222			FALSE	FALSE	FALSE	BMI	0.01016	0.0086	outcome	TRUE	reported	1.99526e-64	0.00826062	exposure	TRUE	reported	2	TRUE	37052
rs35103166	BMI	BIN1	Ferkingstad	Wald ratio	1	0.150769	0.0615385	0.0142856	0.477675	C	T	C	T	0.13	0.0196			FALSE	FALSE	FALSE	BMI	0.01415	0.008	outcome	TRUE	reported	1.20226e-54	0.0083505	exposure	TRUE	reported	2	TRUE	38160
rs36033494	BMI	ITIH3	Niu	Inverse variance weighted	10	-0.0201799	0.0081983	0.0138369	0.477675	C	T	C	T	0.204208	-0.0098			FALSE	FALSE	FALSE	BMI	0.2025	0.0077	outcome	TRUE	reported	4.3242e-10	0.0325447	exposure	TRUE	reported	2	TRUE	38668
rs72981675	BMI	MMP-12	Folkersen	Wald ratio	2	-0.0332642	0.0137794	0.0157762	0.496486	T	C	T	C	-0.77	0.0263			FALSE	FALSE	FALSE	BMI	0.01507	0.0108	outcome	TRUE	reported	1e-200	0.014	exposure	TRUE	reported	2	TRUE	39618
rs142552223	BMI	TRAIL	Folkersen	Wald ratio	1	-0.100213	0.0425532	0.0185227	0.550536	A	G	A	G	-0.47	0.0471			FALSE	FALSE	FALSE	BMI	0.01848	0.02	outcome	TRUE	reported	6.7e-48	0.032	exposure	TRUE	reported	2	TRUE	39618
rs34095724	BMI	CHRD	Ferkingstad	Wald ratio	1	0.336316	0.145789	0.0210627	0.563426	T	C	T	C	-0.19	-0.0639			FALSE	FALSE	FALSE	BMI	0.02103	0.0277	outcome	TRUE	reported	7.07946e-27	0.0177014	exposure	TRUE	reported	2	TRUE	34644
rs17368582	BMI	MMP12	Suhre	Wald ratio	1	0.0350806	0.0151882	0.0209029	0.563426	T	C	T	C	-0.744	-0.0261	0.12		FALSE	FALSE	FALSE	BMI	0.02104	0.0113	outcome	TRUE	reported	1.5e-37	0.056	exposure	TRUE	reported	2	TRUE	37506
rs2830585	BMI	ADAMTS5	Suhre	Wald ratio	1	0.0219944	0.00997204	0.0274115	0.663294	C	T	C	T	-1.073	-0.0236	0.16		FALSE	FALSE	FALSE	BMI	0.02761	0.0107	outcome	TRUE	reported	3.9e-104	0.044	exposure	TRUE	reported	2	TRUE	36152
rs2518136	BMI	AHSG	Suhre	Wald ratio	1	0.0303957	0.0138489	0.0281776	0.663294	C	T	C	T	-0.556	-0.0169	0.46		FALSE	FALSE	FALSE	BMI	0.02906	0.0077	outcome	TRUE	reported	1.7e-39	0.04	exposure	TRUE	reported	2	TRUE	38160
rs498045	BMI	CCS	Ferkingstad	Wald ratio	1	-0.148182	0.0681818	0.0297552	0.663294	A	G	A	G	-0.11	0.0163			FALSE	FALSE	FALSE	BMI	0.02959	0.0075	outcome	TRUE	reported	8.31764e-45	0.00783221	exposure	TRUE	reported	2	TRUE	39719
rs753381	BMI	PLCG1	Ferkingstad	Wald ratio	1	-0.242857	0.111429	0.0292955	0.663294	T	C	T	C	-0.07	0.017			FALSE	FALSE	FALSE	BMI	0.0287	0.0078	outcome	TRUE	reported	5.7544e-17	0.00836305	exposure	TRUE	reported	2	TRUE	36818
rs1974468	BMI	IGHV3-64	Niu	Inverse variance weighted	2	-0.0380802	0.0178283	0.0326839	0.672534	A	G	A	G	0.420275	-0.0146			FALSE	FALSE	FALSE	BMI	0.0613	0.0078	outcome	TRUE	reported	1.32316e-37	0.0320835	exposure	TRUE	reported	2	TRUE	38002
rs734186	BMI	NRP1	Niu	Wald ratio	1	-0.0785406	0.0366523	0.0321246	0.672534	G	A	G	A	-0.210082	0.0165			FALSE	FALSE	FALSE	BMI	0.03262	0.0077	outcome	TRUE	reported	3.10519e-10	0.0332036	exposure	TRUE	reported	2	TRUE	39723
rs10466126	BMI	Enoyl-CoA hydratase	Ferkingstad	Wald ratio	1	0.376667	0.18	0.0363855	0.672612	A	G	A	G	0.06	0.0226			FALSE	FALSE	FALSE	BMI	0.03649	0.0108	outcome	TRUE	reported	9.12011e-11	0.00925803	exposure	TRUE	reported	2	TRUE	35179
rs4792858	BMI	HEXI1	Ferkingstad	Wald ratio	1	-0.193333	0.0922222	0.036048	0.672612	C	A	C	A	0.09	-0.0174			FALSE	FALSE	FALSE	BMI	0.03644	0.0083	outcome	TRUE	reported	1.77828e-23	0.00901379	exposure	TRUE	reported	2	TRUE	38693
rs1922291	BMI	IL1RL2	Suhre	Wald ratio	1	-0.0469208	0.0225806	0.0377165	0.672612	G	A	G	A	0.341	-0.016	0.4		FALSE	FALSE	FALSE	BMI	0.03875	0.0077	outcome	TRUE	reported	1.3e-14	0.044	exposure	TRUE	reported	2	TRUE	39618
rs11603020	BMI	SERPING1	Suhre	Wald ratio	1	0.0184829	0.00886752	0.0371295	0.672612	T	C	T	C	-0.936	-0.0173	0.28		FALSE	FALSE	FALSE	BMI	0.03765	0.0083	outcome	TRUE	reported	5e-96	0.04	exposure	TRUE	reported	2	TRUE	39722
rs520354	BMI	APOB	Suhre	Wald ratio	1	-0.0511551	0.0254125	0.044116	0.685663	A	G	A	G	0.303	-0.0155	0.47		FALSE	FALSE	FALSE	BMI	0.04368	0.0077	outcome	TRUE	reported	6.9e-13	0.042	exposure	TRUE	reported	2	TRUE	38693
rs2527910	BMI	AZGP1	Niu	Wald ratio	1	0.065816	0.0327156	0.0442447	0.685663	T	G	T	G	-0.259815	-0.0171			FALSE	FALSE	FALSE	BMI	0.04492	0.0085	outcome	TRUE	reported	1.44755e-13	0.0348926	exposure	TRUE	reported	2	TRUE	38159.9
rs56124762	BMI	B7-H2	Ferkingstad	Wald ratio	1	-0.20625	0.10875	0.0578871	0.685663	G	A	G	A	-0.08	0.0165			FALSE	FALSE	FALSE	BMI	0.05889	0.0087	outcome	TRUE	reported	4.2658e-18	0.00922566	exposure	TRUE	reported	2	TRUE	38159.9
rs35748882	BMI	DLL4	Ferkingstad	Wald ratio	1	-0.306667	0.154444	0.0470765	0.685663	T	C	T	C	0.18	-0.0552			FALSE	FALSE	FALSE	BMI	0.0469	0.0278	outcome	TRUE	reported	5.01187e-12	0.0260672	exposure	TRUE	reported	2	TRUE	36337
rs2147190	BMI	GPC5	Suhre	Wald ratio	2	0.024385	0.0122555	0.0466219	0.685663	C	T	C	T	0.334	0.0182	0.34		FALSE	FALSE	FALSE	BMI	0.0253	0.0081	outcome	TRUE	reported	2.3e-13	0.045	exposure	TRUE	reported	2	TRUE	38160.1
rs76480089	BMI	Gal-3	Folkersen	Wald ratio	1	0.0451667	0.023	0.049557	0.685663	A	G	A	G	0.6	0.0271			FALSE	FALSE	FALSE	BMI	0.05006	0.0138	outcome	TRUE	reported	1e-200	0.015	exposure	TRUE	reported	2	TRUE	39618
rs4792867	BMI	HEXI2	Ferkingstad	Wald ratio	1	-0.182222	0.0922222	0.0481657	0.685663	T	C	T	C	0.09	-0.0164			FALSE	FALSE	FALSE	BMI	0.04939	0.0083	outcome	TRUE	reported	3.89045e-25	0.00868979	exposure	TRUE	reported	2	TRUE	38693
rs11727676	BMI	HHIP	Ferkingstad	Wald ratio	1	-0.125	0.06375	0.0499042	0.685663	C	T	C	T	0.24	-0.03			FALSE	FALSE	FALSE	BMI	0.04957	0.0153	outcome	TRUE	reported	5.01187e-70	0.013567	exposure	TRUE	reported	2	TRUE	38160
rs11558819	BMI	ICOSLG	Niu	Wald ratio	1	0.0662074	0.0338234	0.050295	0.685663	C	T	C	T	-0.277915	-0.0184			FALSE	FALSE	FALSE	BMI	0.04976	0.0094	outcome	TRUE	reported	2.77957e-14	0.0362467	exposure	TRUE	reported	2	TRUE	33465
rs34231037	BMI	KDR	Suhre	Wald ratio	1	-0.046867	0.0241202	0.0520088	0.685663	A	G	A	G	-1.165	0.0546	0.03		FALSE	FALSE	FALSE	BMI	0.0524	0.0281	outcome	TRUE	reported	4.6e-21	0.121	exposure	TRUE	reported	2	TRUE	33332.9
rs35070799	BMI	LGALS3	Suhre	Wald ratio	1	-0.0449206	0.0234921	0.0558554	0.685663	T	C	T	C	-0.63	0.0283	0.08		FALSE	FALSE	FALSE	BMI	0.05523	0.0148	outcome	TRUE	reported	4.5e-16	0.076	exposure	TRUE	reported	2	TRUE	34923
rs1034826	BMI	Nr-CAM	Ferkingstad	Wald ratio	1	-0.227143	0.118571	0.055408	0.685663	C	T	C	T	-0.07	0.0159			FALSE	FALSE	FALSE	BMI	0.05506	0.0083	outcome	TRUE	reported	3.31131e-12	0.0100519	exposure	TRUE	reported	2	TRUE	39722
rs2305144	BMI	PCYOX1	Niu	Inverse variance weighted	2	-0.0305577	0.0161527	0.0585178	0.685663	A	C	A	C	0.285108	-0.0131			FALSE	FALSE	FALSE	BMI	0.1145	0.0083	outcome	TRUE	reported	1.93925e-18	0.0322125	exposure	TRUE	reported	2	TRUE	38160
rs144767533	BMI	RCL	Ferkingstad	Wald ratio	1	-0.1475	0.0775	0.0570111	0.685663	C	T	C	T	-0.16	0.0236			FALSE	FALSE	FALSE	BMI	0.05682	0.0124	outcome	TRUE	reported	3.16228e-30	0.0140052	exposure	TRUE	reported	2	TRUE	39618
rs79344818	BMI	SBDS	Ferkingstad	Wald ratio	1	0.185312	0.098125	0.0589542	0.685663	G	A	G	A	-0.32	-0.0593			FALSE	FALSE	FALSE	BMI	0.05908	0.0314	outcome	TRUE	reported	1.25893e-43	0.0231034	exposure	TRUE	reported	2	TRUE	24246
rs141494464	BMI	SF3B4	Ferkingstad	Wald ratio	1	-0.337778	0.175556	0.0543482	0.685663	T	C	T	C	-0.09	0.0304			FALSE	FALSE	FALSE	BMI	0.05467	0.0158	outcome	TRUE	reported	1.09648e-09	0.0147669	exposure	TRUE	reported	2	TRUE	36393
rs1260326	BMI	GCKR	Ferkingstad	Wald ratio	1	-0.165556	0.0911111	0.0692059	0.706	T	C	T	C	-0.09	0.0149			FALSE	FALSE	FALSE	BMI	0.07023	0.0082	outcome	TRUE	reported	5.7544e-25	0.00872138	exposure	TRUE	reported	2	TRUE	34279
rs5757912	BMI	IGLV9-49	Niu	Wald ratio	1	0.0577301	0.0317364	0.0689042	0.706	G	A	G	A	0.33085	0.0191			FALSE	FALSE	FALSE	BMI	0.06766	0.0105	outcome	TRUE	reported	3.15505e-14	0.0432453	exposure	TRUE	reported	2	TRUE	38693
rs4938792	BMI	Layilin	Ferkingstad	Wald ratio	1	-0.29	0.158	0.0664401	0.706	C	T	C	T	-0.05	0.0145			FALSE	FALSE	FALSE	BMI	0.0668	0.0079	outcome	TRUE	reported	3.31131e-10	0.00795741	exposure	TRUE	reported	2	TRUE	38266
rs20654	BMI	MARE1	Ferkingstad	Wald ratio	1	0.215714	0.118571	0.0688692	0.706	G	A	G	A	-0.07	-0.0151			FALSE	FALSE	FALSE	BMI	0.06948	0.0083	outcome	TRUE	reported	3.98107e-14	0.00925729	exposure	TRUE	reported	2	TRUE	39722
rs6044699	BMI	NEC2	Ferkingstad	Wald ratio	1	-0.1725	0.095	0.0694027	0.706	A	G	A	G	0.08	-0.0138			FALSE	FALSE	FALSE	BMI	0.06954	0.0076	outcome	TRUE	reported	1.31826e-24	0.00781283	exposure	TRUE	reported	2	TRUE	39618
rs8071756	BMI	SCARF1	Suhre	Wald ratio	1	0.0286441	0.0157627	0.0691858	0.706	A	G	A	G	0.59	0.0169	0.22		FALSE	FALSE	FALSE	BMI	0.0686	0.0093	outcome	TRUE	reported	9.4e-31	0.049	exposure	TRUE	reported	2	TRUE	39724
rs41278571	BMI	VEGF-C	Ferkingstad	Wald ratio	1	0.14	0.07725	0.0699402	0.706	T	C	T	C	0.4	0.056			FALSE	FALSE	FALSE	BMI	0.07017	0.0309	outcome	TRUE	reported	1.20226e-45	0.0282069	exposure	TRUE	reported	2	TRUE	27777
rs3828998	BMI	IGFBP-1	Ferkingstad	Wald ratio	1	0.1775	0.09875	0.0722613	0.715922	C	T	C	T	-0.08	-0.0142			FALSE	FALSE	FALSE	BMI	0.07186	0.0079	outcome	TRUE	reported	3.63078e-21	0.0084721	exposure	TRUE	reported	2	TRUE	38668
rs6695321	BMI	CFHR5	Suhre	Wald ratio	1	0.0334135	0.01875	0.0747409	0.718463	A	G	A	G	-0.416	-0.0139	0.37		FALSE	FALSE	FALSE	BMI	0.07398	0.0078	outcome	TRUE	reported	2.7e-20	0.044	exposure	TRUE	reported	2	TRUE	39618
rs10887871	BMI	CJ058	Ferkingstad	Wald ratio	1	-0.152222	0.0855556	0.0752036	0.718463	G	A	G	A	-0.09	0.0137			FALSE	FALSE	FALSE	BMI	0.07461	0.0077	outcome	TRUE	reported	4.57088e-32	0.00763572	exposure	TRUE	reported	2	TRUE	39618
rs3012572	BMI	CD109	Niu	Weighted median	5	-0.0230752	0.0131193	0.0785991	0.723235	T	C	T	C	-0.297201	0.0034			FALSE	FALSE	FALSE	BMI	0.6728	0.008	outcome	TRUE	reported	9.46528e-19	0.033267	exposure	TRUE	reported	2	TRUE	38160
rs7249890	BMI	FCGBP	Niu	Wald ratio	1	0.06799	0.0388514	0.0801183	0.723235	T	C	T	C	0.288278	0.0196			FALSE	FALSE	FALSE	BMI	0.08123	0.0112	outcome	TRUE	reported	4.59437e-09	0.048956	exposure	TRUE	reported	2	TRUE	37235
rs17413015	BMI	FCGR2A FCGR2B	Suhre	Wald ratio	1	0.0135929	0.00786187	0.0838141	0.723235	C	T	C	T	1.361	0.0185	0.15		FALSE	FALSE	FALSE	BMI	0.08435	0.0107	outcome	TRUE	reported	9.2e-137	0.046	exposure	TRUE	reported	2	TRUE	38159.9
rs4879780	BMI	K1161	Ferkingstad	Wald ratio	1	-0.114167	0.065	0.0790184	0.723235	A	G	A	G	-0.12	0.0137			FALSE	FALSE	FALSE	BMI	0.07727	0.0078	outcome	TRUE	reported	7.07946e-51	0.00799871	exposure	TRUE	reported	2	TRUE	39618
rs6467443	BMI	PLXA4	Ferkingstad	Wald ratio	1	0.166	0.096	0.0837793	0.723235	T	G	T	G	0.1	0.0166			FALSE	FALSE	FALSE	BMI	0.08222	0.0096	outcome	TRUE	reported	2.88403e-22	0.0103045	exposure	TRUE	reported	2	TRUE	38160
rs74479613	BMI	SCO2	Ferkingstad	Wald ratio	1	-0.155625	0.09	0.0837793	0.723235	T	C	T	C	-0.16	0.0249			FALSE	FALSE	FALSE	BMI	0.0843	0.0144	outcome	TRUE	reported	8.70964e-31	0.0138699	exposure	TRUE	reported	2	TRUE	36162
rs17783344	BMI	GRAN	Ferkingstad	Wald ratio	1	-0.0483721	0.0283721	0.0882097	0.743273	G	T	G	T	-0.43	0.0208			FALSE	FALSE	FALSE	BMI	0.08828	0.0122	outcome	TRUE	reported	1e-200	0.0134947	exposure	TRUE	reported	2	TRUE	37358
rs348452	BMI	Retinal dehydrogenase 1	Ferkingstad	Wald ratio	1	-0.148	0.087	0.0889149	0.743273	T	C	T	C	0.1	-0.0148			FALSE	FALSE	FALSE	BMI	0.08926	0.0087	outcome	TRUE	reported	1.38038e-27	0.00918816	exposure	TRUE	reported	2	TRUE	38667.9
rs75466623	BMI	RGM-C	Ferkingstad	Wald ratio	1	-0.152857	0.0902857	0.0904482	0.744459	T	C	T	C	-0.35	0.0535			FALSE	FALSE	FALSE	BMI	0.09069	0.0316	outcome	TRUE	reported	5.24807e-18	0.0404725	exposure	TRUE	reported	2	TRUE	30973
rs10779750	BMI	MASP2	Niu	Wald ratio	1	0.0477835	0.028389	0.0923425	0.748534	T	C	T	C	0.355772	0.017			FALSE	FALSE	FALSE	BMI	0.09332	0.0101	outcome	TRUE	reported	1.15398e-17	0.0411706	exposure	TRUE	reported	2	TRUE	36393
rs7482118	BMI	AP2A2	Ferkingstad	Wald ratio	1	-0.226667	0.138333	0.101306	0.802164	A	G	A	G	0.06	-0.0136			FALSE	FALSE	FALSE	BMI	0.09893	0.0083	outcome	TRUE	reported	1.02329e-13	0.00806684	exposure	TRUE	reported	2	TRUE	38160
rs61745945	BMI	AP4AT	Ferkingstad	Wald ratio	1	-0.297727	0.183636	0.104956	0.802164	A	G	A	G	-0.22	0.0655			FALSE	FALSE	FALSE	BMI	0.1054	0.0404	outcome	TRUE	reported	2.45471e-16	0.0268375	exposure	TRUE	reported	2	TRUE	31201
rs217181	BMI	HP	Suhre	Wald ratio	1	0.0163883	0.0100209	0.101962	0.802164	C	T	C	T	0.958	0.0157	0.2		FALSE	FALSE	FALSE	BMI	0.1028	0.0096	outcome	TRUE	reported	1.3e-75	0.048	exposure	TRUE	reported	2	TRUE	38160
rs12137007	BMI	SLAF6	Ferkingstad	Wald ratio	1	0.0728571	0.0447619	0.103597	0.802164	G	A	G	A	-0.21	-0.0153			FALSE	FALSE	FALSE	BMI	0.1027	0.0094	outcome	TRUE	reported	2.34423e-91	0.0103599	exposure	TRUE	reported	2	TRUE	39723
rs4672	BMI	FKBP2	Ferkingstad	Wald ratio	1	0.30625	0.19	0.106996	0.80624	A	G	A	G	-0.08	-0.0245			FALSE	FALSE	FALSE	BMI	0.1064	0.0152	outcome	TRUE	reported	1.34896e-09	0.0131982	exposure	TRUE	reported	2	TRUE	35738.9
rs6542680	BMI	COLEC11	Niu	Wald ratio	1	0.0469801	0.0292863	0.108677	0.807533	C	T	C	T	-0.327798	-0.0154			FALSE	FALSE	FALSE	BMI	0.1079	0.0096	outcome	TRUE	reported	2.91733e-15	0.0411787	exposure	TRUE	reported	2	TRUE	38160
rs35871176	BMI	CCL18	Suhre	Wald ratio	2	-0.0259677	0.0166438	0.118711	0.870009	C	T	C	T	-0.308	0.0101	0.48		FALSE	FALSE	FALSE	BMI	0.2164	0.0082	outcome	TRUE	reported	7.3e-13	0.042	exposure	TRUE	reported	2	TRUE	38160
rs12459668	BMI	A1BG	Niu	Wald ratio	1	0.0430515	0.0409684	0.293329	0.872889	G	A	G	A	0.43204	0.0186			FALSE	FALSE	FALSE	BMI	0.2931	0.0177	outcome	TRUE	reported	2.09859e-10	0.0676271	exposure	TRUE	reported	2	TRUE	37077
rs7305336	BMI	A2M	Niu	Wald ratio	1	-0.0490524	0.0343367	0.153127	0.872889	C	A	C	A	-0.244636	0.012			FALSE	FALSE	FALSE	BMI	0.1523	0.0084	outcome	TRUE	reported	1.84561e-11	0.0361964	exposure	TRUE	reported	2	TRUE	39618
rs3118663	BMI	ADAMTS13	Suhre	Wald ratio	1	0.0270886	0.0192405	0.159162	0.872889	G	A	G	A	0.395	0.0107	0.49		FALSE	FALSE	FALSE	BMI	0.1566	0.0076	outcome	TRUE	reported	1.4e-20	0.041	exposure	TRUE	reported	2	TRUE	38800
rs1229984	BMI	ADH1B	Ferkingstad	Wald ratio	1	-0.05	0.0509302	0.32623	0.872889	T	C	T	C	-0.43	0.0215			FALSE	FALSE	FALSE	BMI	0.3247	0.0219	outcome	TRUE	reported	3.54813e-12	0.061834	exposure	TRUE	reported	2	TRUE	38159.9
rs7184253	BMI	AGRP	Suhre	Wald ratio	1	0.0297199	0.0224117	0.184811	0.872889	T	C	T	C	0.821	0.0244	0.05		FALSE	FALSE	FALSE	BMI	0.1856	0.0184	outcome	TRUE	reported	6.7e-18	0.093	exposure	TRUE	reported	2	TRUE	39618
rs4820224	BMI	APOL1	Niu	Wald ratio	1	0.0511159	0.042653	0.230756	0.872889	G	A	G	A	-0.295407	-0.0151			FALSE	FALSE	FALSE	BMI	0.2309	0.0126	outcome	TRUE	reported	1.62435e-08	0.0520786	exposure	TRUE	reported	2	TRUE	37956
rs504683	BMI	ARRB1	Ferkingstad	Wald ratio	1	0.11875	0.1125	0.291171	0.872889	G	A	G	A	0.08	0.0095			FALSE	FALSE	FALSE	BMI	0.2925	0.009	outcome	TRUE	reported	9.77237e-20	0.00879947	exposure	TRUE	reported	2	TRUE	38160
rs60252802	BMI	B3GT6	Ferkingstad	Wald ratio	1	0.204286	0.164286	0.213692	0.872889	C	T	C	T	-0.07	-0.0143			FALSE	FALSE	FALSE	BMI	0.2109	0.0115	outcome	TRUE	reported	2.95121e-10	0.0111088	exposure	TRUE	reported	2	TRUE	37235
rs4255564	BMI	BR serine/threonine kinase 2	Ferkingstad	Wald ratio	1	-0.0535294	0.0541176	0.322599	0.872889	C	T	C	T	0.17	-0.0091			FALSE	FALSE	FALSE	BMI	0.32	0.0092	outcome	TRUE	reported	2.45471e-70	0.0095882	exposure	TRUE	reported	2	TRUE	38160
rs11085194	BMI	C3	Niu	Inverse variance weighted	2	0.0326373	0.0214063	0.127345	0.872889	C	T	C	T	0.216984	0.0026			FALSE	FALSE	FALSE	BMI	0.7528	0.0081	outcome	TRUE	reported	8.88215e-11	0.0332715	exposure	TRUE	reported	2	TRUE	37609
rs1013579	BMI	C8A C8B C8G	Suhre	Wald ratio	1	0.0329975	0.0301008	0.272976	0.872889	T	C	T	C	-0.794	-0.0262	0.04		FALSE	FALSE	FALSE	BMI	0.2735	0.0239	outcome	TRUE	reported	9.3e-13	0.11	exposure	TRUE	reported	2	TRUE	36743
rs112887513	BMI	C8G	Niu	MR Egger	10	-0.02872	0.0242656	0.270559	0.872889	G	A	G	A	-0.435277	-0.0213			FALSE	FALSE	FALSE	BMI	0.4017	0.0254	outcome	TRUE	reported	1.65392e-12	0.0612353	exposure	TRUE	reported	2	TRUE	29869
rs17741049	BMI	CA13	Suhre	Wald ratio	1	-0.0333333	0.022043	0.130484	0.872889	C	T	C	T	-0.744	0.0248	0.07		FALSE	FALSE	FALSE	BMI	0.131	0.0164	outcome	TRUE	reported	7.9e-20	0.08	exposure	TRUE	reported	2	TRUE	38668
rs56148170	BMI	CA198	Ferkingstad	Wald ratio	1	0.0935714	0.075	0.212171	0.872889	G	A	G	A	0.14	0.0131			FALSE	FALSE	FALSE	BMI	0.2138	0.0105	outcome	TRUE	reported	3.98107e-33	0.0116758	exposure	TRUE	reported	2	TRUE	39618
rs10895987	BMI	CAPN1 CAPNS1	Suhre	Wald ratio	1	0.0254902	0.0196078	0.193601	0.872889	C	T	C	T	-0.459	-0.0117	0.23		FALSE	FALSE	FALSE	BMI	0.1956	0.009	outcome	TRUE	reported	1e-18	0.051	exposure	TRUE	reported	2	TRUE	38267
rs41341749	BMI	CCL14	Suhre	Wald ratio	1	0.0139197	0.0137489	0.311336	0.872889	A	G	A	G	-1.171	-0.0163	0.06		FALSE	FALSE	FALSE	BMI	0.3103	0.0161	outcome	TRUE	reported	3e-43	0.081	exposure	TRUE	reported	2	TRUE	39618
rs41341749	BMI	CCL23	Suhre	Wald ratio	1	-0.0157946	0.0156008	0.311336	0.872889	A	G	A	G	1.032	-0.0163	0.06		FALSE	FALSE	FALSE	BMI	0.3103	0.0161	outcome	TRUE	reported	3.1e-32	0.084	exposure	TRUE	reported	2	TRUE	39618
rs41341749	BMI	CCL3	Suhre	Wald ratio	1	-0.0299632	0.0295956	0.311336	0.872889	A	G	A	G	0.544	-0.0163	0.06		FALSE	FALSE	FALSE	BMI	0.3103	0.0161	outcome	TRUE	reported	1e-09	0.088	exposure	TRUE	reported	2	TRUE	39618
rs4239252	BMI	CCL5	Suhre	Wald ratio	1	0.0364162	0.0286127	0.203115	0.872889	G	A	G	A	-0.346	-0.0126	0.21		FALSE	FALSE	FALSE	BMI	0.2044	0.0099	outcome	TRUE	reported	7.8e-11	0.053	exposure	TRUE	reported	2	TRUE	38160
rs6958168	BMI	CCM2	Ferkingstad	Wald ratio	1	-0.138571	0.132857	0.296943	0.872889	G	T	G	T	0.07	-0.0097			FALSE	FALSE	FALSE	BMI	0.2981	0.0093	outcome	TRUE	reported	1.04713e-11	0.0102943	exposure	TRUE	reported	2	TRUE	39618.1
rs8106657	BMI	CD209	Suhre	Wald ratio	1	0.0301105	0.0265193	0.256201	0.872889	T	C	T	C	-0.362	-0.0109	0.26		FALSE	FALSE	FALSE	BMI	0.2567	0.0096	outcome	TRUE	reported	4.2e-13	0.049	exposure	TRUE	reported	2	TRUE	37235.1
rs4810485	BMI	CD40	Folkersen	Wald ratio	1	-0.0186	0.0178	0.296049	0.872889	T	G	T	G	-0.5	0.0093			FALSE	FALSE	FALSE	BMI	0.2956	0.0089	outcome	TRUE	reported	1e-200	0.012	exposure	TRUE	reported	2	TRUE	36963
rs12134133	BMI	CD55	Suhre	Wald ratio	1	0.0182149	0.0153005	0.233859	0.872889	G	A	G	A	-0.549	-0.01	0.29		FALSE	FALSE	FALSE	BMI	0.2324	0.0084	outcome	TRUE	reported	1.6e-33	0.044	exposure	TRUE	reported	2	TRUE	39723
rs3740909	BMI	CDON	Suhre	Wald ratio	1	-0.0236429	0.0160434	0.140567	0.872889	C	T	C	T	-0.829	0.0196	0.07		FALSE	FALSE	FALSE	BMI	0.1423	0.0133	outcome	TRUE	reported	4.4e-25	0.078	exposure	TRUE	reported	2	TRUE	36154
rs72674829	BMI	CFI	Niu	Inverse variance weighted	2	-0.0224231	0.018516	0.225889	0.872889	G	A	G	A	-0.249134	0.0086			FALSE	FALSE	FALSE	BMI	0.3045	0.0084	outcome	TRUE	reported	1.67166e-12	0.0350558	exposure	TRUE	reported	2	TRUE	39618
rs58134724	BMI	CHST4	Ferkingstad	Wald ratio	1	0.12	0.1025	0.241707	0.872889	T	C	T	C	0.08	0.0096			FALSE	FALSE	FALSE	BMI	0.242	0.0082	outcome	TRUE	reported	6.45654e-20	0.00875618	exposure	TRUE	reported	2	TRUE	39618
rs6571678	BMI	COF2	Ferkingstad	Wald ratio	1	-0.082	0.0753333	0.276376	0.872889	G	A	G	A	0.15	-0.0123			FALSE	FALSE	FALSE	BMI	0.2763	0.0113	outcome	TRUE	reported	1.1749e-43	0.0108259	exposure	TRUE	reported	2	TRUE	37210
rs113952349	BMI	CPN1	Niu	Inverse variance weighted	9	0.0103789	0.00763915	0.174258	0.872889	C	T	C	T	-0.465603	0.0012			FALSE	FALSE	FALSE	BMI	0.9335	0.0139	outcome	TRUE	reported	4.37173e-15	0.0588735	exposure	TRUE	reported	2	TRUE	39618
rs2425143	BMI	CPNE1	Suhre	Wald ratio	1	0.0135158	0.0104478	0.195786	0.872889	C	T	C	T	-1.206	-0.0163	0.11		FALSE	FALSE	FALSE	BMI	0.1969	0.0126	outcome	TRUE	reported	3.6e-73	0.061	exposure	TRUE	reported	2	TRUE	39618.1
rs17112191	BMI	CTBS	Niu	Wald ratio	1	-0.0639499	0.042081	0.12859	0.872889	T	G	T	G	-0.301799	0.0193			FALSE	FALSE	FALSE	BMI	0.128	0.0127	outcome	TRUE	reported	1.88577e-09	0.0499942	exposure	TRUE	reported	2	TRUE	39618
rs3947	BMI	CTSB	Suhre	Wald ratio	1	0.0174757	0.0178641	0.327945	0.872889	G	A	G	A	0.515	0.009	0.28		FALSE	FALSE	FALSE	BMI	0.3269	0.0092	outcome	TRUE	reported	1.5e-27	0.046	exposure	TRUE	reported	2	TRUE	37506
rs3117604	BMI	CXCL1	Folkersen	Wald ratio	1	-0.0407143	0.0307143	0.184978	0.872889	T	C	T	C	-0.28	0.0114			FALSE	FALSE	FALSE	BMI	0.1864	0.0086	outcome	TRUE	reported	5.8e-117	0.012	exposure	TRUE	reported	2	TRUE	37235
rs12749939	BMI	DCUP	Ferkingstad	Wald ratio	1	0.0359259	0.0325926	0.270343	0.872889	T	C	T	C	-0.27	-0.0097			FALSE	FALSE	FALSE	BMI	0.2684	0.0088	outcome	TRUE	reported	1e-200	0.0085958	exposure	TRUE	reported	2	TRUE	39618.1
rs61757207	BMI	DD19A	Ferkingstad	Wald ratio	1	0.137333	0.134333	0.306624	0.872889	G	A	G	A	-0.3	-0.0412			FALSE	FALSE	FALSE	BMI	0.3065	0.0403	outcome	TRUE	reported	6.60693e-12	0.0436941	exposure	TRUE	reported	2	TRUE	28192
rs61757207	BMI	DEAD-box protein 19B	Ferkingstad	Wald ratio	1	0.142069	0.138966	0.306624	0.872889	G	A	G	A	-0.29	-0.0412			FALSE	FALSE	FALSE	BMI	0.3065	0.0403	outcome	TRUE	reported	3.89045e-11	0.0438849	exposure	TRUE	reported	2	TRUE	28192
rs715544	BMI	DGC14	Ferkingstad	Wald ratio	1	0.0883333	0.0727778	0.224847	0.872889	A	G	A	G	-0.18	-0.0159			FALSE	FALSE	FALSE	BMI	0.2226	0.0131	outcome	TRUE	reported	2.0893e-24	0.0176559	exposure	TRUE	reported	2	TRUE	37032
rs55797991	BMI	DJB14	Ferkingstad	Wald ratio	1	-0.1775	0.14	0.204849	0.872889	T	C	T	C	-0.08	0.0142			FALSE	FALSE	FALSE	BMI	0.2052	0.0112	outcome	TRUE	reported	3.01995e-12	0.0114666	exposure	TRUE	reported	2	TRUE	38160
rs12668458	BMI	DNJB6	Ferkingstad	Wald ratio	1	0.186	0.162	0.250907	0.872889	C	T	C	T	0.05	0.0093			FALSE	FALSE	FALSE	BMI	0.2524	0.0081	outcome	TRUE	reported	2.75423e-10	0.0079214	exposure	TRUE	reported	2	TRUE	38160
rs221205	BMI	DPY30	Ferkingstad	Wald ratio	1	0.172	0.125	0.168822	0.872889	T	C	T	C	0.1	0.0172			FALSE	FALSE	FALSE	BMI	0.1707	0.0125	outcome	TRUE	reported	1.34896e-16	0.0120931	exposure	TRUE	reported	2	TRUE	39618
rs78111814	BMI	DSCAM	Ferkingstad	Wald ratio	1	0.0672727	0.0636364	0.290446	0.872889	C	T	C	T	0.33	0.0222			FALSE	FALSE	FALSE	BMI	0.2918	0.021	outcome	TRUE	reported	7.24436e-81	0.0173275	exposure	TRUE	reported	2	TRUE	36393
rs919129	BMI	DUT	Ferkingstad	Wald ratio	1	-0.155	0.13125	0.237622	0.872889	G	A	G	A	-0.08	0.0124			FALSE	FALSE	FALSE	BMI	0.2376	0.0105	outcome	TRUE	reported	1.12202e-12	0.0112444	exposure	TRUE	reported	2	TRUE	38773
rs13294	BMI	ECM1	Suhre	Wald ratio	1	-0.0134276	0.00918728	0.143868	0.872889	G	A	G	A	-0.849	0.0114	0.4		FALSE	FALSE	FALSE	BMI	0.1463	0.0078	outcome	TRUE	reported	7.7e-102	0.035	exposure	TRUE	reported	2	TRUE	37613
rs147307766	BMI	ECP	Folkersen	Wald ratio	1	0.0388	0.0378	0.304677	0.872889	T	C	T	C	0.5	0.0194			FALSE	FALSE	FALSE	BMI	0.3025	0.0189	outcome	TRUE	reported	9e-26	0.048	exposure	TRUE	reported	2	TRUE	37609
rs6750059	BMI	EDAR	Suhre	Wald ratio	1	-0.0204545	0.0202273	0.311904	0.872889	T	C	T	C	-0.44	0.009	0.25		FALSE	FALSE	FALSE	BMI	0.3156	0.0089	outcome	TRUE	reported	1.3e-18	0.049	exposure	TRUE	reported	2	TRUE	39618
rs72930984	BMI	EIF1A	Ferkingstad	Wald ratio	1	-0.0544444	0.0407937	0.181997	0.872889	T	C	T	C	0.63	-0.0343			FALSE	FALSE	FALSE	BMI	0.1824	0.0257	outcome	TRUE	reported	3.0903e-118	0.0272521	exposure	TRUE	reported	2	TRUE	39618.1
rs6050446	BMI	ENTP6	Ferkingstad	Wald ratio	1	0.0947059	0.0705882	0.179704	0.872889	A	G	A	G	-0.34	-0.0322			FALSE	FALSE	FALSE	BMI	0.179	0.024	outcome	TRUE	reported	2.29087e-47	0.0235193	exposure	TRUE	reported	2	TRUE	36637
rs62389053	BMI	EPN4	Ferkingstad	Wald ratio	1	0.18875	0.1375	0.169837	0.872889	T	C	T	C	-0.08	-0.0151			FALSE	FALSE	FALSE	BMI	0.1723	0.011	outcome	TRUE	reported	2.04174e-11	0.0119349	exposure	TRUE	reported	2	TRUE	39618
rs2289252	BMI	F11	Suhre	Wald ratio	1	-0.0205882	0.0180995	0.255329	0.872889	C	T	C	T	0.442	-0.0091	0.41		FALSE	FALSE	FALSE	BMI	0.2558	0.008	outcome	TRUE	reported	4.6e-25	0.042	exposure	TRUE	reported	2	TRUE	38160
rs5980	BMI	F13A1	Niu	Inverse variance weighted	2	0.0267329	0.0216366	0.216631	0.872889	C	T	C	T	-0.233193	-0.0044			FALSE	FALSE	FALSE	BMI	0.6294	0.0091	outcome	TRUE	reported	1.76931e-09	0.0385624	exposure	TRUE	reported	2	TRUE	39618
rs13165400	BMI	F172A	Ferkingstad	Wald ratio	1	-0.131	0.123	0.286858	0.872889	A	G	A	G	0.1	-0.0131			FALSE	FALSE	FALSE	BMI	0.29	0.0123	outcome	TRUE	reported	1.34896e-12	0.014106	exposure	TRUE	reported	2	TRUE	39618
rs34028712	BMI	F176C	Ferkingstad	Wald ratio	1	-0.147143	0.115714	0.203514	0.872889	C	T	C	T	0.07	-0.0103			FALSE	FALSE	FALSE	BMI	0.2009	0.0081	outcome	TRUE	reported	6.76083e-18	0.0081217	exposure	TRUE	reported	2	TRUE	38160.1
rs10919544	BMI	FCGR3B	Suhre	Wald ratio	1	-0.0205451	0.0188679	0.276203	0.872889	T	C	T	C	0.477	-0.0098	0.38		FALSE	FALSE	FALSE	BMI	0.2723	0.009	outcome	TRUE	reported	3.5e-28	0.042	exposure	TRUE	reported	2	TRUE	38159.9
rs7522061	BMI	FCRL3	Suhre	Wald ratio	1	-0.0115385	0.0116864	0.323475	0.872889	T	C	T	C	0.676	-0.0078	0.43		FALSE	FALSE	FALSE	BMI	0.3225	0.0079	outcome	TRUE	reported	5.4e-57	0.04	exposure	TRUE	reported	2	TRUE	35230
rs57198275	BMI	FCRL6	Ferkingstad	Wald ratio	1	0.0926667	0.0653333	0.156084	0.872889	A	G	A	G	-0.15	-0.0139			FALSE	FALSE	FALSE	BMI	0.1545	0.0098	outcome	TRUE	reported	3.01995e-47	0.0103898	exposure	TRUE	reported	2	TRUE	39618
rs10922098	BMI	FHR3	Ferkingstad	Wald ratio	1	-0.08	0.0709091	0.259233	0.872889	C	T	C	T	0.11	-0.0088			FALSE	FALSE	FALSE	BMI	0.2564	0.0078	outcome	TRUE	reported	1.1749e-41	0.00813546	exposure	TRUE	reported	2	TRUE	39618
rs288326	BMI	FRZB	Suhre	Wald ratio	1	-0.0210602	0.0181948	0.247076	0.872889	G	A	G	A	0.698	-0.0147	0.13		FALSE	FALSE	FALSE	BMI	0.2478	0.0127	outcome	TRUE	reported	8.6e-28	0.062	exposure	TRUE	reported	2	TRUE	36581
rs778986	BMI	FUT3	Suhre	Wald ratio	1	-0.0164516	0.011828	0.164253	0.872889	G	A	G	A	-0.93	0.0153	0.2		FALSE	FALSE	FALSE	BMI	0.1651	0.011	outcome	TRUE	reported	8.8e-73	0.047	exposure	TRUE	reported	2	TRUE	32406
rs139011716	BMI	GALP	Ferkingstad	Wald ratio	1	0.163478	0.151304	0.279937	0.872889	A	G	A	G	0.23	0.0376			FALSE	FALSE	FALSE	BMI	0.279	0.0348	outcome	TRUE	reported	2.51189e-15	0.029066	exposure	TRUE	reported	2	TRUE	35443.1
rs6556885	BMI	GLRX1	Ferkingstad	Wald ratio	1	0.12125	0.1125	0.281133	0.872889	A	G	A	G	-0.08	-0.0097			FALSE	FALSE	FALSE	BMI	0.2789	0.009	outcome	TRUE	reported	1.31826e-20	0.00859593	exposure	TRUE	reported	2	TRUE	39618.1
rs72835078	BMI	GP1BA	Niu	Wald ratio	1	-0.0431823	0.039681	0.276491	0.872889	G	T	G	T	0.342733	-0.0148			FALSE	FALSE	FALSE	BMI	0.2757	0.0136	outcome	TRUE	reported	5.41721e-09	0.0584797	exposure	TRUE	reported	2	TRUE	39618
rs1654439	BMI	GP6	Suhre	Wald ratio	1	0.0156773	0.0159817	0.326616	0.872889	G	T	G	T	-0.657	-0.0103	0.17		FALSE	FALSE	FALSE	BMI	0.3241	0.0105	outcome	TRUE	reported	6.6e-31	0.055	exposure	TRUE	reported	2	TRUE	39618.1
rs883394	BMI	Galectin-4	Ferkingstad	Wald ratio	1	0.2	0.154	0.194046	0.872889	T	C	T	C	-0.05	-0.01			FALSE	FALSE	FALSE	BMI	0.1927	0.0077	outcome	TRUE	reported	3.98107e-11	0.00757027	exposure	TRUE	reported	2	TRUE	38160
rs2035675	BMI	HPX	Niu	Inverse variance weighted	2	-0.0197547	0.0193625	0.307608	0.872889	A	G	A	G	0.422793	-0.0063			FALSE	FALSE	FALSE	BMI	0.4852	0.009	outcome	TRUE	reported	1.25521e-28	0.0374711	exposure	TRUE	reported	2	TRUE	39618
rs6081231	BMI	Histidyl-tRNA synthetase-related	Ferkingstad	Wald ratio	1	-0.0415	0.04	0.299503	0.872889	A	G	A	G	-0.2	0.0083			FALSE	FALSE	FALSE	BMI	0.298	0.008	outcome	TRUE	reported	1.69824e-128	0.00829325	exposure	TRUE	reported	2	TRUE	39618
rs5498	BMI	ICAM1	Suhre	Wald ratio	1	-0.00624486	0.00632703	0.323636	0.872889	A	G	A	G	-1.217	0.0076	0.43		FALSE	FALSE	FALSE	BMI	0.3293	0.0077	outcome	TRUE	reported	1e-200	0.025	exposure	TRUE	reported	2	TRUE	37613
rs5498	BMI	ICAM5	Suhre	Wald ratio	1	0.0148728	0.0150685	0.323636	0.872889	A	G	A	G	0.511	0.0076	0.43		FALSE	FALSE	FALSE	BMI	0.3293	0.0077	outcome	TRUE	reported	2.4e-32	0.042	exposure	TRUE	reported	2	TRUE	37613
rs3944157	BMI	IGHV3-74	Niu	Wald ratio	1	-0.0516604	0.0363019	0.154714	0.872889	C	T	C	T	0.214865	-0.0111			FALSE	FALSE	FALSE	BMI	0.1564	0.0078	outcome	TRUE	reported	2.37422e-10	0.0337346	exposure	TRUE	reported	2	TRUE	38002
rs13411893	BMI	IGKV1-17	Niu	Wald ratio	1	-0.0619091	0.0451052	0.169893	0.872889	G	A	G	A	-0.339207	0.021			FALSE	FALSE	FALSE	BMI	0.1704	0.0153	outcome	TRUE	reported	1.05028e-08	0.0590149	exposure	TRUE	reported	2	TRUE	38160.1
rs139977220	BMI	IL-22	Ferkingstad	Wald ratio	1	-0.157692	0.139231	0.257384	0.872889	A	G	A	G	0.13	-0.0205			FALSE	FALSE	FALSE	BMI	0.257	0.0181	outcome	TRUE	reported	1.54882e-12	0.0183874	exposure	TRUE	reported	2	TRUE	39618
rs12126142	BMI	IL-6RA	Folkersen	Wald ratio	1	-0.011875	0.00833333	0.154157	0.872889	A	G	A	G	0.96	-0.0114			FALSE	FALSE	FALSE	BMI	0.1509	0.008	outcome	TRUE	reported	1e-200	0.0069	exposure	TRUE	reported	2	TRUE	38160
rs1564641	BMI	IL16	Folkersen	Wald ratio	2	-0.0170534	0.0152762	0.264278	0.872889	A	G	A	G	0.067	0.0035			FALSE	FALSE	FALSE	BMI	0.6425	0.0076	outcome	TRUE	reported	1.2e-09	0.011	exposure	TRUE	reported	2	TRUE	39722
rs6543140	BMI	IL18RAP	Suhre	Wald ratio	1	0.0235052	0.016701	0.159307	0.872889	G	T	G	T	0.485	0.0114	0.3		FALSE	FALSE	FALSE	BMI	0.1583	0.0081	outcome	TRUE	reported	1e-24	0.046	exposure	TRUE	reported	2	TRUE	39618
rs11209026	BMI	IL23R	Suhre	Wald ratio	1	0.0301887	0.0212938	0.156272	0.872889	G	A	G	A	-0.742	-0.0224	0.06		FALSE	FALSE	FALSE	BMI	0.1575	0.0158	outcome	TRUE	reported	3.4e-16	0.089	exposure	TRUE	reported	2	TRUE	37604
rs4129267	BMI	IL6R	Suhre	Wald ratio	1	0.0080298	0.00678808	0.236838	0.872889	C	T	C	T	1.208	0.0097	0.38		FALSE	FALSE	FALSE	BMI	0.2317	0.0082	outcome	TRUE	reported	1e-200	0.025	exposure	TRUE	reported	2	TRUE	35610
rs11957503	BMI	IL7R	Suhre	Wald ratio	1	0.0261176	0.0181176	0.149427	0.872889	T	G	T	G	0.425	0.0111	0.44		FALSE	FALSE	FALSE	BMI	0.151	0.0077	outcome	TRUE	reported	1.9e-21	0.044	exposure	TRUE	reported	2	TRUE	39618
rs140904849	BMI	IMA7	Ferkingstad	Wald ratio	1	0.188889	0.141111	0.180707	0.872889	T	C	T	C	0.18	0.034			FALSE	FALSE	FALSE	BMI	0.1797	0.0254	outcome	TRUE	reported	8.70964e-14	0.0241315	exposure	TRUE	reported	2	TRUE	39618
rs11809759	BMI	INSL5	Ferkingstad	Wald ratio	1	0.166667	0.133333	0.2113	0.872889	G	A	G	A	0.06	0.01			FALSE	FALSE	FALSE	BMI	0.2108	0.008	outcome	TRUE	reported	1.54882e-12	0.00848651	exposure	TRUE	reported	2	TRUE	38160
rs316617	BMI	IP3KA	Ferkingstad	Wald ratio	1	0.12	0.115714	0.299719	0.872889	C	T	C	T	0.07	0.0084			FALSE	FALSE	FALSE	BMI	0.3044	0.0081	outcome	TRUE	reported	4.2658e-18	0.00807245	exposure	TRUE	reported	2	TRUE	38160
rs10415576	BMI	IRF-3	Ferkingstad	Wald ratio	1	-0.144286	0.121429	0.234741	0.872889	C	T	C	T	-0.07	0.0101			FALSE	FALSE	FALSE	BMI	0.2326	0.0085	outcome	TRUE	reported	8.51138e-18	0.00814666	exposure	TRUE	reported	2	TRUE	38160
rs6555820	BMI	KIM-1	Folkersen	Wald ratio	1	-0.018125	0.0160417	0.258531	0.872889	A	C	A	C	-0.48	0.0087			FALSE	FALSE	FALSE	BMI	0.2611	0.0077	outcome	TRUE	reported	1e-200	0.0095	exposure	TRUE	reported	2	TRUE	38160
rs7259090	BMI	KIR2DL4	Suhre	Wald ratio	1	0.0322034	0.0324455	0.320935	0.872889	G	A	G	A	0.413	0.0133	0.17		FALSE	FALSE	FALSE	BMI	0.3239	0.0134	outcome	TRUE	reported	1.3e-12	0.057	exposure	TRUE	reported	2	TRUE	35324
rs2659067	BMI	KLK7	Suhre	Wald ratio	1	-0.0262542	0.0232441	0.258688	0.872889	G	A	G	A	-0.598	0.0157	0.09		FALSE	FALSE	FALSE	BMI	0.2591	0.0139	outcome	TRUE	reported	1.2e-15	0.074	exposure	TRUE	reported	2	TRUE	38159.9
rs4796667	BMI	Keratin 20	Ferkingstad	Wald ratio	1	-0.135	0.131667	0.305214	0.872889	T	C	T	C	0.06	-0.0081			FALSE	FALSE	FALSE	BMI	0.3069	0.0079	outcome	TRUE	reported	1.69824e-12	0.00850189	exposure	TRUE	reported	2	TRUE	39618
rs854469	BMI	LD78-beta	Ferkingstad	Wald ratio	1	0.132222	0.122222	0.279333	0.872889	G	A	G	A	0.09	0.0119			FALSE	FALSE	FALSE	BMI	0.278	0.011	outcome	TRUE	reported	1.44544e-11	0.0133269	exposure	TRUE	reported	2	TRUE	39618
rs78459351	BMI	LEGL	Ferkingstad	Wald ratio	1	0.12125	0.11625	0.296943	0.872889	A	G	A	G	0.16	0.0194			FALSE	FALSE	FALSE	BMI	0.2962	0.0186	outcome	TRUE	reported	3.46737e-17	0.0189806	exposure	TRUE	reported	2	TRUE	39244
rs10505752	BMI	LOX-1	Folkersen	Wald ratio	1	0.133636	0.0936364	0.153527	0.872889	A	G	A	G	0.11	0.0147			FALSE	FALSE	FALSE	BMI	0.1513	0.0103	outcome	TRUE	reported	2.4e-12	0.015	exposure	TRUE	reported	2	TRUE	39173
rs11160753	BMI	MARK3	Ferkingstad	Wald ratio	1	0.163333	0.155	0.291991	0.872889	C	T	C	T	-0.06	-0.0098			FALSE	FALSE	FALSE	BMI	0.2924	0.0093	outcome	TRUE	reported	1.77828e-10	0.00940533	exposure	TRUE	reported	2	TRUE	37209.9
rs8181938	BMI	MAX	Ferkingstad	Wald ratio	1	-0.0461111	0.0438889	0.293427	0.872889	G	A	G	A	-0.18	0.0083			FALSE	FALSE	FALSE	BMI	0.2909	0.0079	outcome	TRUE	reported	1.41254e-106	0.00820878	exposure	TRUE	reported	2	TRUE	39618
rs10824796	BMI	MBL2	Suhre	Wald ratio	1	-0.013804	0.00948367	0.145516	0.872889	G	A	G	A	-0.949	0.0131	0.22		FALSE	FALSE	FALSE	BMI	0.1471	0.009	outcome	TRUE	reported	1e-89	0.043	exposure	TRUE	reported	2	TRUE	39725
rs6740268	BMI	MCEE	Ferkingstad	Wald ratio	1	-0.1575	0.13375	0.238968	0.872889	G	T	G	T	-0.08	0.0126			FALSE	FALSE	FALSE	BMI	0.2391	0.0107	outcome	TRUE	reported	6.45654e-16	0.00990052	exposure	TRUE	reported	2	TRUE	37093
rs1047286	BMI	MCEM1	Ferkingstad	Wald ratio	1	0.291667	0.195	0.134725	0.872889	A	G	A	G	-0.06	-0.0175			FALSE	FALSE	FALSE	BMI	0.133	0.0117	outcome	TRUE	reported	1.44544e-11	0.00888458	exposure	TRUE	reported	2	TRUE	33356
rs2739338	BMI	MIF	Ferkingstad	Wald ratio	1	0.147143	0.121429	0.225602	0.872889	T	C	T	C	0.07	0.0103			FALSE	FALSE	FALSE	BMI	0.2245	0.0085	outcome	TRUE	reported	4.57088e-18	0.00807978	exposure	TRUE	reported	2	TRUE	36891
rs4859571	BMI	NAAA	Suhre	Wald ratio	1	0.0163121	0.0126241	0.19631	0.872889	C	T	C	T	-0.705	-0.0115	0.24		FALSE	FALSE	FALSE	BMI	0.1956	0.0089	outcome	TRUE	reported	1.1e-46	0.047	exposure	TRUE	reported	2	TRUE	37612
rs6714900	BMI	NAGK	Suhre	Wald ratio	1	-0.023301	0.0157282	0.138478	0.872889	A	G	A	G	-0.515	0.012	0.33		FALSE	FALSE	FALSE	BMI	0.1361	0.0081	outcome	TRUE	reported	3.8e-29	0.045	exposure	TRUE	reported	2	TRUE	39618
rs7206272	BMI	NDE1	Ferkingstad	Wald ratio	1	-0.11125	0.11125	0.317311	0.872889	C	A	C	A	0.08	-0.0089			FALSE	FALSE	FALSE	BMI	0.3155	0.0089	outcome	TRUE	reported	1.7378e-16	0.00971002	exposure	TRUE	reported	2	TRUE	39618
rs12052479	BMI	PDK1	Suhre	Wald ratio	1	-0.0183566	0.0152098	0.227472	0.872889	C	A	C	A	-0.572	0.0105	0.21		FALSE	FALSE	FALSE	BMI	0.2286	0.0087	outcome	TRUE	reported	2.5e-28	0.05	exposure	TRUE	reported	2	TRUE	39618
rs73072196	BMI	PECR	Ferkingstad	Wald ratio	1	-0.124	0.0966667	0.199577	0.872889	C	T	C	T	-0.15	0.0186			FALSE	FALSE	FALSE	BMI	0.1986	0.0145	outcome	TRUE	reported	2.5704e-32	0.0126742	exposure	TRUE	reported	2	TRUE	38160.1
rs7040970	BMI	PGD2 synthase	Ferkingstad	Wald ratio	1	0.0564286	0.0557143	0.311146	0.872889	C	T	C	T	0.14	0.0079			FALSE	FALSE	FALSE	BMI	0.3106	0.0078	outcome	TRUE	reported	7.4131e-67	0.00810477	exposure	TRUE	reported	2	TRUE	38160
rs62406520	BMI	PI16	Niu	Wald ratio	1	-0.0662179	0.0441453	0.133614	0.872889	A	G	A	G	-0.317135	0.021			FALSE	FALSE	FALSE	BMI	0.1343	0.014	outcome	TRUE	reported	2.07762e-08	0.0563362	exposure	TRUE	reported	2	TRUE	38160.1
rs6032067	BMI	PI3	Suhre	Wald ratio	1	-0.026799	0.0240695	0.265536	0.872889	G	T	G	T	0.403	-0.0108	0.18		FALSE	FALSE	FALSE	BMI	0.2663	0.0097	outcome	TRUE	reported	3.2e-14	0.052	exposure	TRUE	reported	2	TRUE	39618
rs2361355	BMI	PLXNC1	Suhre	Wald ratio	1	-0.0174569	0.0170259	0.305214	0.872889	A	G	A	G	-0.464	0.0081	0.41		FALSE	FALSE	FALSE	BMI	0.305	0.0079	outcome	TRUE	reported	8.6e-27	0.042	exposure	TRUE	reported	2	TRUE	38160
rs854538	BMI	PON3	Niu	Weighted mode	5	0.0232774	0.0180428	0.26654	0.872889	G	A	G	A	0.204313	-0.01			FALSE	FALSE	FALSE	BMI	0.1924	0.0077	outcome	TRUE	reported	1.15496e-09	0.0334016	exposure	TRUE	reported	2	TRUE	39618
rs10823500	BMI	PPA1	Suhre	Wald ratio	1	0.0284289	0.0197007	0.14901	0.872889	A	G	A	G	0.401	0.0114	0.37		FALSE	FALSE	FALSE	BMI	0.1501	0.0079	outcome	TRUE	reported	1.5e-18	0.045	exposure	TRUE	reported	2	TRUE	38160
rs111647176	BMI	PTN9	Ferkingstad	Wald ratio	1	0.165714	0.125714	0.187443	0.872889	A	G	A	G	-0.07	-0.0116			FALSE	FALSE	FALSE	BMI	0.1837	0.0088	outcome	TRUE	reported	1.62181e-15	0.00878591	exposure	TRUE	reported	2	TRUE	38160
rs12607866	BMI	RAB31	Ferkingstad	Wald ratio	1	-0.100769	0.0692308	0.145516	0.872889	C	T	C	T	0.13	-0.0131			FALSE	FALSE	FALSE	BMI	0.146	0.009	outcome	TRUE	reported	6.91831e-47	0.00904039	exposure	TRUE	reported	2	TRUE	38160
rs12293998	BMI	RELT	Ferkingstad	Wald ratio	1	-0.198333	0.148333	0.181197	0.872889	G	T	G	T	0.06	-0.0119			FALSE	FALSE	FALSE	BMI	0.1834	0.0089	outcome	TRUE	reported	1.1749e-11	0.0088453	exposure	TRUE	reported	2	TRUE	39618
rs2505535	BMI	RET	Suhre	Wald ratio	1	0.02529	0.0192575	0.189098	0.872889	G	A	G	A	-0.431	-0.0109	0.27		FALSE	FALSE	FALSE	BMI	0.1906	0.0083	outcome	TRUE	reported	2.8e-19	0.047	exposure	TRUE	reported	2	TRUE	39718
rs1993373	BMI	SAA1	Suhre	Wald ratio	1	-0.0141767	0.00916031	0.121714	0.872889	G	A	G	A	0.917	-0.013	0.34		FALSE	FALSE	FALSE	BMI	0.1221	0.0084	outcome	TRUE	reported	2.2e-105	0.037	exposure	TRUE	reported	2	TRUE	39067
rs12938	BMI	SELL	Suhre	Wald ratio	1	0.0201232	0.0180698	0.265435	0.872889	A	G	A	G	-0.487	-0.0098	0.28		FALSE	FALSE	FALSE	BMI	0.2672	0.0088	outcome	TRUE	reported	4.5e-25	0.046	exposure	TRUE	reported	2	TRUE	38160
rs61976132	BMI	SERPINA3	Niu	Simple mode	4	-0.0330824	0.0231033	0.247573	0.872889	G	A	G	A	-0.275768	-0.0038			FALSE	FALSE	FALSE	BMI	0.7223	0.0106	outcome	TRUE	reported	1.70433e-11	0.0407315	exposure	TRUE	reported	2	TRUE	38160
rs882732	BMI	SERPINA4	Suhre	Wald ratio	1	0.0136432	0.0128936	0.289992	0.872889	G	A	G	A	0.667	0.0091	0.25		FALSE	FALSE	FALSE	BMI	0.2921	0.0086	outcome	TRUE	reported	7.7e-48	0.043	exposure	TRUE	reported	2	TRUE	39617.9
rs3826539	BMI	SERPINF2	Niu	Wald ratio	1	0.0439201	0.0352189	0.212376	0.872889	T	C	T	C	-0.241348	-0.0106			FALSE	FALSE	FALSE	BMI	0.2095	0.0085	outcome	TRUE	reported	1.21116e-11	0.0353839	exposure	TRUE	reported	2	TRUE	38160
rs1641549	BMI	SHBG	Niu	Inverse variance weighted	2	-0.0382419	0.0299896	0.202248	0.872889	C	T	C	T	-0.202284	0.0141			FALSE	FALSE	FALSE	BMI	0.1207	0.0091	outcome	TRUE	reported	2.11615e-08	0.0359546	exposure	TRUE	reported	2	TRUE	38160
rs6448333	BMI	SPCS	Ferkingstad	Wald ratio	1	-0.15125	0.115	0.188437	0.872889	T	C	T	C	-0.16	0.0242			FALSE	FALSE	FALSE	BMI	0.1886	0.0184	outcome	TRUE	reported	4.67735e-14	0.0212184	exposure	TRUE	reported	2	TRUE	39618.1
rs1869085	BMI	STIM1	Ferkingstad	Wald ratio	1	-0.105	0.081	0.194873	0.872889	C	A	C	A	-0.1	0.0105			FALSE	FALSE	FALSE	BMI	0.197	0.0081	outcome	TRUE	reported	5.37032e-29	0.00894809	exposure	TRUE	reported	2	TRUE	39618
rs7508539	BMI	SYSM	Ferkingstad	Wald ratio	1	-0.0818182	0.0718182	0.254603	0.872889	G	A	G	A	0.11	-0.009			FALSE	FALSE	FALSE	BMI	0.2537	0.0079	outcome	TRUE	reported	1.34896e-40	0.00824569	exposure	TRUE	reported	2	TRUE	39618
rs62466701	BMI	TFPI -2	Ferkingstad	Wald ratio	1	0.238182	0.178182	0.181309	0.872889	C	T	C	T	0.11	0.0262			FALSE	FALSE	FALSE	BMI	0.181	0.0196	outcome	TRUE	reported	1.62181e-11	0.0163288	exposure	TRUE	reported	2	TRUE	36074
rs73238029	BMI	TIGIT	Ferkingstad	Wald ratio	1	0.135	0.115	0.24043	0.872889	C	A	C	A	0.08	0.0108			FALSE	FALSE	FALSE	BMI	0.2413	0.0092	outcome	TRUE	reported	6.60693e-20	0.00875857	exposure	TRUE	reported	2	TRUE	37235.1
rs45602433	BMI	TNC	Suhre	Wald ratio	1	-0.0129524	0.0109524	0.236964	0.872889	C	T	C	T	1.05	-0.0136	0.15		FALSE	FALSE	FALSE	BMI	0.2373	0.0115	outcome	TRUE	reported	3.9e-74	0.053	exposure	TRUE	reported	2	TRUE	34380
rs56339337	BMI	TNFSF15	Ferkingstad	Wald ratio	1	-0.195714	0.161429	0.225363	0.872889	G	A	G	A	-0.07	0.0137			FALSE	FALSE	FALSE	BMI	0.2234	0.0113	outcome	TRUE	reported	9.54993e-10	0.011444	exposure	TRUE	reported	2	TRUE	37210
rs35717222	BMI	TRIM3	Ferkingstad	Wald ratio	1	0.0807143	0.0742857	0.277241	0.872889	A	G	A	G	-0.14	-0.0113			FALSE	FALSE	FALSE	BMI	0.2768	0.0104	outcome	TRUE	reported	2.95121e-39	0.0106803	exposure	TRUE	reported	2	TRUE	39618
rs11555995	BMI	TSSC4	Ferkingstad	Wald ratio	1	0.2575	0.24	0.283309	0.872889	G	A	G	A	0.08	0.0206			FALSE	FALSE	FALSE	BMI	0.2832	0.0192	outcome	TRUE	reported	8.51138e-11	0.0123242	exposure	TRUE	reported	2	TRUE	31748
rs10194022	BMI	TTL	Ferkingstad	Wald ratio	1	-0.16125	0.1625	0.321047	0.872889	T	C	T	C	0.08	-0.0129			FALSE	FALSE	FALSE	BMI	0.323	0.013	outcome	TRUE	reported	5.12861e-13	0.0110775	exposure	TRUE	reported	2	TRUE	38160.1
rs2071065	BMI	Triosephosphate isomerase	Ferkingstad	Wald ratio	1	-0.201667	0.148333	0.173972	0.872889	C	T	C	T	-0.06	0.0121			FALSE	FALSE	FALSE	BMI	0.174	0.0089	outcome	TRUE	reported	2.13796e-10	0.0094472	exposure	TRUE	reported	2	TRUE	37235
rs3803884	BMI	WFIKKN2	Suhre	Wald ratio	1	0.0206039	0.0154529	0.182422	0.872889	T	C	T	C	0.563	0.0116	0.31		FALSE	FALSE	FALSE	BMI	0.1794	0.0087	outcome	TRUE	reported	1.4e-40	0.04	exposure	TRUE	reported	2	TRUE	36048
rs522162	BMI		Niu	Wald ratio	1	0.0174262	0.0169318	0.303387	0.872889	T	C	T	C	0.809128	0.0141			FALSE	FALSE	FALSE	BMI	0.3034	0.0137	outcome	TRUE	reported	2.8044e-43	0.0571972	exposure	TRUE	reported	2	TRUE	37851
rs117002784	BMI	pTEN	Ferkingstad	Wald ratio	1	-0.206154	0.207692	0.320909	0.872889	T	C	T	C	0.13	-0.0268			FALSE	FALSE	FALSE	BMI	0.3202	0.027	outcome	TRUE	reported	2.88403e-10	0.0206189	exposure	TRUE	reported	2	TRUE	39244
rs2020921	BMI	tPA	Ferkingstad	Wald ratio	1	0.0598305	0.0533898	0.262443	0.872889	A	G	A	G	-0.59	-0.0353			FALSE	FALSE	FALSE	BMI	0.2614	0.0315	outcome	TRUE	reported	3.63078e-144	0.0230774	exposure	TRUE	reported	2	TRUE	31463
rs2241883	BMI	FABPL	Ferkingstad	Wald ratio	1	-0.0709091	0.0736364	0.335566	0.881432	C	T	C	T	-0.11	0.0078			FALSE	FALSE	FALSE	BMI	0.3356	0.0081	outcome	TRUE	reported	4.0738e-37	0.0086416	exposure	TRUE	reported	2	TRUE	37612
rs36054946	BMI	SCG1	Ferkingstad	Wald ratio	1	0.131724	0.136552	0.334722	0.881432	C	T	C	T	-0.29	-0.0382			FALSE	FALSE	FALSE	BMI	0.3351	0.0396	outcome	TRUE	reported	1.44544e-16	0.035105	exposure	TRUE	reported	2	TRUE	34657.9
rs12278812	BMI	THYN1	Ferkingstad	Wald ratio	1	-0.168333	0.175	0.336097	0.881432	C	A	C	A	-0.06	0.0101			FALSE	FALSE	FALSE	BMI	0.335	0.0105	outcome	TRUE	reported	1.12202e-10	0.00930301	exposure	TRUE	reported	2	TRUE	38160
rs62263730	BMI	MO2R1	Ferkingstad	Wald ratio	1	0.0666667	0.07	0.340904	0.885696	A	G	A	G	0.12	0.008			FALSE	FALSE	FALSE	BMI	0.3422	0.0084	outcome	TRUE	reported	1.44544e-42	0.00877557	exposure	TRUE	reported	2	TRUE	38160
rs344560	BMI	TNFSF14	Folkersen	Wald ratio	1	-0.0265079	0.0279365	0.34269	0.885696	T	C	T	C	-0.63	0.0167			FALSE	FALSE	FALSE	BMI	0.341	0.0176	outcome	TRUE	reported	1.6e-137	0.025	exposure	TRUE	reported	2	TRUE	33459
rs61916271	BMI	sCD4	Ferkingstad	Wald ratio	1	-0.16	0.168333	0.341861	0.885696	A	G	A	G	-0.06	0.0096			FALSE	FALSE	FALSE	BMI	0.3422	0.0101	outcome	TRUE	reported	4.67735e-10	0.00963149	exposure	TRUE	reported	2	TRUE	38160
rs12459419	BMI	CD33	Suhre	Wald ratio	1	-0.00661959	0.0070609	0.348501	0.892097	C	T	C	T	-1.133	0.0075	0.28		FALSE	FALSE	FALSE	BMI	0.3495	0.008	outcome	TRUE	reported	2.9e-165	0.034	exposure	TRUE	reported	2	TRUE	39618
rs806109	BMI	KCAB2	Ferkingstad	Wald ratio	1	0.1125	0.12	0.348501	0.892097	G	A	G	A	-0.08	-0.009			FALSE	FALSE	FALSE	BMI	0.3493	0.0096	outcome	TRUE	reported	6.60693e-17	0.00957641	exposure	TRUE	reported	2	TRUE	38160.1
rs2071387	BMI	CRBP	Ferkingstad	Wald ratio	1	-0.0988889	0.106667	0.353883	0.897287	G	A	G	A	0.09	-0.0089			FALSE	FALSE	FALSE	BMI	0.3516	0.0096	outcome	TRUE	reported	1.14815e-20	0.0096552	exposure	TRUE	reported	2	TRUE	39724
rs2097326	BMI	TIMP3	Suhre	Wald ratio	1	0.0084855	0.00912997	0.352676	0.897287	A	G	A	G	0.931	0.0079	0.28		FALSE	FALSE	FALSE	BMI	0.353	0.0085	outcome	TRUE	reported	4.4e-97	0.04	exposure	TRUE	reported	2	TRUE	39618.1
rs11713634	BMI	CPN2	Niu	Inverse variance weighted	2	0.0109587	0.0118689	0.355842	0.897997	G	A	G	A	-0.614661	-0.0092			FALSE	FALSE	FALSE	BMI	0.2831	0.0085	outcome	TRUE	reported	5.82983e-68	0.0338863	exposure	TRUE	reported	2	TRUE	37235
rs225656	BMI	DRG-1	Ferkingstad	Wald ratio	1	-0.138	0.152	0.363934	0.904728	A	C	A	C	-0.05	0.0069			FALSE	FALSE	FALSE	BMI	0.3636	0.0076	outcome	TRUE	reported	7.24436e-10	0.00811602	exposure	TRUE	reported	2	TRUE	39618
rs26496	BMI	ERAP1	Suhre	Wald ratio	1	0.00734513	0.00814159	0.366964	0.904728	G	A	G	A	1.13	0.0083	0.2		FALSE	FALSE	FALSE	BMI	0.3666	0.0092	outcome	TRUE	reported	6.4e-123	0.041	exposure	TRUE	reported	2	TRUE	39618
rs3827278	BMI	IL17RA	Suhre	Wald ratio	1	0.00912821	0.0100513	0.363792	0.904728	C	A	C	A	0.975	0.0089	0.23		FALSE	FALSE	FALSE	BMI	0.3635	0.0098	outcome	TRUE	reported	2e-93	0.043	exposure	TRUE	reported	2	TRUE	35602
rs34097845	BMI	MPO	Folkersen	Wald ratio	1	-0.0534286	0.0591429	0.366323	0.904728	T	C	T	C	-0.35	0.0187			FALSE	FALSE	FALSE	BMI	0.3656	0.0207	outcome	TRUE	reported	2.7e-73	0.019	exposure	TRUE	reported	2	TRUE	36393
rs4149584	BMI	TNF-R1	Folkersen	Wald ratio	1	-0.1	0.110571	0.365787	0.904728	T	C	T	C	-0.35	0.035			FALSE	FALSE	FALSE	BMI	0.3665	0.0387	outcome	TRUE	reported	7.9e-20	0.038	exposure	TRUE	reported	2	TRUE	32345
rs145234879	BMI	OVCA2	Ferkingstad	Wald ratio	1	-0.0787805	0.0878049	0.3696	0.907047	A	C	A	C	0.41	-0.0323			FALSE	FALSE	FALSE	BMI	0.3701	0.036	outcome	TRUE	reported	8.70964e-21	0.0438471	exposure	TRUE	reported	2	TRUE	35345
rs36032232	BMI	ANXA2	Suhre	Wald ratio	1	-0.00927835	0.0115464	0.421645	0.930815	A	G	A	G	0.97	-0.009	0.15		FALSE	FALSE	FALSE	BMI	0.4249	0.0112	outcome	TRUE	reported	6.9e-66	0.052	exposure	TRUE	reported	2	TRUE	39618
rs1132216	BMI	C1R	Niu	MR Egger	4	0.0202392	0.0204417	0.426482	0.930815	C	G	C	G	-0.320019	0.005			FALSE	TRUE	TRUE	BMI	0.7036	0.0132	outcome	TRUE	reported	3.71859e-09	0.0540207	exposure	TRUE	reported	2	FALSE	38160
rs9302690	BMI	CCL17	Suhre	Wald ratio	1	-0.0194847	0.0227053	0.390806	0.930815	G	A	G	A	0.621	-0.0121	0.08		FALSE	FALSE	FALSE	BMI	0.3902	0.0141	outcome	TRUE	reported	4.2e-15	0.078	exposure	TRUE	reported	2	TRUE	39719
rs11556868	BMI	CH3L2	Ferkingstad	Wald ratio	1	-0.112222	0.135556	0.407745	0.930815	T	C	T	C	0.09	-0.0101			FALSE	FALSE	FALSE	BMI	0.4062	0.0122	outcome	TRUE	reported	2.13796e-13	0.0122618	exposure	TRUE	reported	2	TRUE	35030
rs35285321	BMI	CSTB	Folkersen	Wald ratio	1	0.0128302	0.015283	0.401185	0.930815	A	G	A	G	-0.53	-0.0068			FALSE	FALSE	FALSE	BMI	0.4021	0.0081	outcome	TRUE	reported	1e-200	0.01	exposure	TRUE	reported	2	TRUE	38159.9
rs16850073	BMI	CXCL6	Folkersen	Wald ratio	1	0.0132075	0.0164151	0.421052	0.930815	T	C	T	C	0.53	0.007			FALSE	FALSE	FALSE	BMI	0.4214	0.0087	outcome	TRUE	reported	1e-200	0.012	exposure	TRUE	reported	2	TRUE	37235
rs4725617	BMI	EPHA1	Suhre	Wald ratio	1	-0.00819549	0.0103759	0.429612	0.930815	G	A	G	A	-1.33	0.0109	0.09		FALSE	FALSE	FALSE	BMI	0.4281	0.0138	outcome	TRUE	reported	2.9e-80	0.064	exposure	TRUE	reported	2	TRUE	37611
rs3813498	BMI	FOXO3A	Ferkingstad	Wald ratio	1	-0.133333	0.156667	0.394734	0.930815	C	T	C	T	0.06	-0.008			FALSE	FALSE	FALSE	BMI	0.3925	0.0094	outcome	TRUE	reported	9.77237e-10	0.00981501	exposure	TRUE	reported	2	TRUE	39618
rs112253475	BMI	GDF-15	Folkersen	Wald ratio	2	0.027105	0.0312616	0.385922	0.930815	A	G	A	G	0.27	0.0009			FALSE	FALSE	FALSE	BMI	0.9773	0.0317	outcome	TRUE	reported	6.5e-10	0.044	exposure	TRUE	reported	2	TRUE	32734.9
rs78564162	BMI	Granzyme B	Ferkingstad	Wald ratio	1	0.0775	0.090625	0.392456	0.930815	G	A	G	A	0.16	0.0124			FALSE	FALSE	FALSE	BMI	0.3944	0.0145	outcome	TRUE	reported	2.29087e-23	0.016065	exposure	TRUE	reported	2	TRUE	39618
rs2949833	BMI	IGFBP3	Suhre	Wald ratio	1	-0.0151869	0.0193925	0.433549	0.930815	C	T	C	T	0.428	-0.0065	0.29		FALSE	FALSE	FALSE	BMI	0.4377	0.0083	outcome	TRUE	reported	2.6e-22	0.043	exposure	TRUE	reported	2	TRUE	38266
rs73153741	BMI	IGLV6-57	Niu	Simple mode	3	-0.0286557	0.0265427	0.393206	0.930815	G	C	G	C	0.29462	0.0173			FALSE	TRUE	TRUE	BMI	0.1563	0.0122	outcome	TRUE	reported	3.46854e-09	0.0496357	exposure	TRUE	reported	2	FALSE	37786
rs5744249	BMI	IL-18	Folkersen	Wald ratio	1	0.0322727	0.04	0.419771	0.930815	A	C	A	C	0.22	0.0071			FALSE	FALSE	FALSE	BMI	0.4201	0.0088	outcome	TRUE	reported	3.7e-74	0.012	exposure	TRUE	reported	2	TRUE	39618
rs4848312	BMI	IL-1ra	Folkersen	Wald ratio	2	0.0403528	0.0486536	0.406884	0.930815	A	G	A	G	0.14	-0.0042			FALSE	FALSE	FALSE	BMI	0.6106	0.0083	outcome	TRUE	reported	1e-37	0.011	exposure	TRUE	reported	2	TRUE	39618
rs10005645	BMI	KLKB1	Niu	MR Egger	8	-0.0217998	0.0239407	0.397625	0.930815	T	C	T	C	0.202325	0.0085			FALSE	FALSE	FALSE	BMI	0.2919	0.008	outcome	TRUE	reported	1.71246e-09	0.0334282	exposure	TRUE	reported	2	TRUE	38160
rs2504925	BMI	LPA	Niu	Inverse variance weighted	8	0.00699576	0.00826178	0.397128	0.930815	T	C	T	C	0.253999	0.013			FALSE	FALSE	FALSE	BMI	0.1707	0.0095	outcome	TRUE	reported	1.96543e-10	0.0396947	exposure	TRUE	reported	2	TRUE	38693
rs3011487	BMI	MCF2L	Ferkingstad	Wald ratio	1	0.0314286	0.0380952	0.409372	0.930815	C	T	C	T	0.21	0.0066			FALSE	FALSE	FALSE	BMI	0.4136	0.008	outcome	TRUE	reported	6.91831e-149	0.00808092	exposure	TRUE	reported	2	TRUE	38001.9
rs1997365	BMI	MK08	Ferkingstad	Wald ratio	1	-0.105	0.135	0.4367	0.930815	C	A	C	A	-0.06	0.0063			FALSE	FALSE	FALSE	BMI	0.4345	0.0081	outcome	TRUE	reported	2.29087e-10	0.00946304	exposure	TRUE	reported	2	TRUE	38160
rs12360820	BMI	MUCDL	Ferkingstad	Wald ratio	1	-0.128571	0.147143	0.382235	0.930815	A	C	A	C	-0.07	0.009			FALSE	FALSE	FALSE	BMI	0.3821	0.0103	outcome	TRUE	reported	2.5704e-11	0.0104959	exposure	TRUE	reported	2	TRUE	38160
rs17584278	BMI	NEK7	Ferkingstad	Wald ratio	1	0.0461429	0.0587143	0.431933	0.930815	G	A	G	A	-0.7	-0.0323			FALSE	FALSE	FALSE	BMI	0.4315	0.0411	outcome	TRUE	reported	2.69153e-27	0.0646797	exposure	TRUE	reported	2	TRUE	29405.9
rs13060373	BMI	PCNP	Ferkingstad	Wald ratio	1	-0.0775	0.09375	0.408426	0.930815	A	G	A	G	-0.08	0.0062			FALSE	FALSE	FALSE	BMI	0.4104	0.0075	outcome	TRUE	reported	1.20226e-23	0.00798128	exposure	TRUE	reported	2	TRUE	39618
rs111669928	BMI	PEPD	Niu	Weighted median	4	0.0145247	0.0185185	0.432842	0.930815	A	G	A	G	0.391651	-0.0013			FALSE	FALSE	FALSE	BMI	0.9398	0.0175	outcome	TRUE	reported	1.51452e-09	0.0644942	exposure	TRUE	reported	2	TRUE	38160
rs10212397	BMI	RAB6B	Ferkingstad	Wald ratio	1	-0.0334615	0.0388462	0.389025	0.930815	A	G	A	G	-0.26	0.0087			FALSE	FALSE	FALSE	BMI	0.3907	0.0101	outcome	TRUE	reported	9.54993e-135	0.0105244	exposure	TRUE	reported	2	TRUE	39618
rs160438	BMI	RIPK2	Ferkingstad	Wald ratio	1	-0.11	0.1375	0.423711	0.930815	G	A	G	A	0.08	-0.0088			FALSE	FALSE	FALSE	BMI	0.4227	0.011	outcome	TRUE	reported	8.91251e-13	0.0111945	exposure	TRUE	reported	2	TRUE	38160
rs11608458	BMI	SCF	Folkersen	Wald ratio	1	0.0928571	0.115714	0.422282	0.930815	T	C	T	C	-0.07	-0.0065			FALSE	FALSE	FALSE	BMI	0.4199	0.0081	outcome	TRUE	reported	5.9e-09	0.012	exposure	TRUE	reported	2	TRUE	38264
rs704	BMI	SDF2	Ferkingstad	Wald ratio	1	0.0275	0.0341667	0.42089	0.930815	G	A	G	A	-0.24	-0.0066			FALSE	FALSE	FALSE	BMI	0.4224	0.0082	outcome	TRUE	reported	7.24436e-194	0.00808028	exposure	TRUE	reported	2	TRUE	33623
rs4656716	BMI	SELE	Folkersen	Wald ratio	1	-0.0572727	0.0736364	0.4367	0.930815	A	G	A	G	0.11	-0.0063			FALSE	FALSE	FALSE	BMI	0.4382	0.0081	outcome	TRUE	reported	6.9e-25	0.01	exposure	TRUE	reported	2	TRUE	39618
rs4796791	BMI	STAT3	Ferkingstad	Wald ratio	1	0.044	0.0533333	0.409372	0.930815	T	C	T	C	-0.15	-0.0066			FALSE	FALSE	FALSE	BMI	0.4112	0.008	outcome	TRUE	reported	4.2658e-78	0.00801799	exposure	TRUE	reported	2	TRUE	38160
rs2231569	BMI	TBCB	Ferkingstad	Wald ratio	1	0.115625	0.140625	0.41095	0.930815	T	G	T	G	0.16	0.0185			FALSE	FALSE	FALSE	BMI	0.4112	0.0225	outcome	TRUE	reported	1.90546e-12	0.0227233	exposure	TRUE	reported	2	TRUE	38159.9
rs2235256	BMI	TENR	Ferkingstad	Wald ratio	1	-0.0484615	0.0607692	0.425179	0.930815	G	A	G	A	-0.13	0.0063			FALSE	FALSE	FALSE	BMI	0.4206	0.0079	outcome	TRUE	reported	4.89779e-62	0.00782136	exposure	TRUE	reported	2	TRUE	38160
rs36097961	BMI	VAV	Ferkingstad	Wald ratio	1	-0.126364	0.16	0.429661	0.930815	T	C	T	C	-0.11	0.0139			FALSE	FALSE	FALSE	BMI	0.4276	0.0176	outcome	TRUE	reported	1.41254e-16	0.0133113	exposure	TRUE	reported	2	TRUE	35497
rs704	BMI	VTN	Niu	Wald ratio	1	0.0265474	0.0329831	0.42089	0.930815	G	A	G	A	-0.248612	-0.0066			FALSE	FALSE	FALSE	BMI	0.4224	0.0082	outcome	TRUE	reported	1.01344e-14	0.0318744	exposure	TRUE	reported	2	TRUE	33623
rs466104	BMI	WIF-1	Ferkingstad	Wald ratio	1	-0.101667	0.125	0.416027	0.930815	C	T	C	T	-0.06	0.0061			FALSE	FALSE	FALSE	BMI	0.4181	0.0075	outcome	TRUE	reported	5.62341e-13	0.00832257	exposure	TRUE	reported	2	TRUE	39618.1
rs2302465	BMI	BST1	Suhre	Wald ratio	1	-0.00680949	0.00879878	0.438982	0.931238	G	A	G	A	-1.307	0.0089	0.13		FALSE	FALSE	FALSE	BMI	0.438	0.0115	outcome	TRUE	reported	1.4e-108	0.052	exposure	TRUE	reported	2	TRUE	37612
rs5746026	BMI	TNF-R2	Folkersen	Wald ratio	1	0.0471053	0.0610526	0.44038	0.931238	A	G	A	G	-0.38	-0.0179			FALSE	FALSE	FALSE	BMI	0.4396	0.0232	outcome	TRUE	reported	1.1e-40	0.028	exposure	TRUE	reported	2	TRUE	38152
rs6031847	BMI	14-3-3 protein beta/alpha	Ferkingstad	Wald ratio	1	0.0361111	0.0488889	0.460128	0.931963	T	C	T	C	-0.18	-0.0065			FALSE	FALSE	FALSE	BMI	0.4583	0.0088	outcome	TRUE	reported	3.23594e-87	0.00909284	exposure	TRUE	reported	2	TRUE	38667.9
rs17693106	BMI	ANR27	Ferkingstad	Wald ratio	1	0.112	0.154	0.467059	0.931963	A	G	A	G	-0.05	-0.0056			FALSE	FALSE	FALSE	BMI	0.4676	0.0077	outcome	TRUE	reported	1.28825e-10	0.0077778	exposure	TRUE	reported	2	TRUE	39618
rs2842126	BMI	ASAH2	Suhre	Wald ratio	1	-0.0114809	0.0153078	0.453255	0.931963	G	A	G	A	-0.601	0.0069	0.23		FALSE	FALSE	FALSE	BMI	0.4531	0.0092	outcome	TRUE	reported	5.7e-34	0.048	exposure	TRUE	reported	2	TRUE	39617.9
rs4646787	BMI	Aldehyde dehydrogenase, class 3	Ferkingstad	Wald ratio	1	0.0446154	0.0607692	0.462841	0.931963	A	G	A	G	-0.13	-0.0058			FALSE	FALSE	FALSE	BMI	0.4608	0.0079	outcome	TRUE	reported	6.76083e-53	0.00849229	exposure	TRUE	reported	2	TRUE	39723
rs4356932	BMI	CXCL11	Suhre	Wald ratio	1	0.0176292	0.0234043	0.451302	0.931963	C	T	C	T	0.329	0.0058	0.45		FALSE	FALSE	FALSE	BMI	0.4532	0.0077	outcome	TRUE	reported	4.3e-14	0.043	exposure	TRUE	reported	2	TRUE	38043
rs4508864	BMI	FGB	Niu	Wald ratio	1	-0.0308714	0.0403043	0.443702	0.931963	C	T	C	T	0.233226	-0.0072			FALSE	FALSE	FALSE	BMI	0.4458	0.0094	outcome	TRUE	reported	7.17861e-09	0.0401217	exposure	TRUE	reported	2	TRUE	39725
rs148328786	BMI	GRB2-related adapter protein 2	Ferkingstad	Wald ratio	1	-0.176667	0.243333	0.467822	0.931963	G	A	G	A	0.15	-0.0265			FALSE	FALSE	FALSE	BMI	0.4667	0.0365	outcome	TRUE	reported	1.14815e-15	0.0187269	exposure	TRUE	reported	2	TRUE	28950.9
rs1203119	BMI	HGFAC	Suhre	Wald ratio	1	0.013198	0.0173604	0.447115	0.931963	G	A	G	A	-0.985	-0.013	0.08		FALSE	FALSE	FALSE	BMI	0.445	0.0171	outcome	TRUE	reported	1.1e-35	0.076	exposure	TRUE	reported	2	TRUE	39618
rs13411467	BMI	IGKV1-16	Niu	Inverse variance weighted	2	0.0265225	0.0349412	0.447816	0.931963	T	C	T	C	0.35754	0			FALSE	FALSE	FALSE	BMI	0.9995	0.0114	outcome	TRUE	reported	4.89292e-14	0.0470931	exposure	TRUE	reported	2	TRUE	38267
rs7288450	BMI	IGLV3-10	Niu	Wald ratio	1	-0.0299963	0.0417136	0.472079	0.931963	C	T	C	T	0.21336	-0.0064			FALSE	FALSE	FALSE	BMI	0.472	0.0089	outcome	TRUE	reported	1.53582e-09	0.0351477	exposure	TRUE	reported	2	TRUE	38160
rs111294128	BMI	LDHA	Ferkingstad	Wald ratio	1	0.1312	0.1824	0.471957	0.931963	G	A	G	A	-0.25	-0.0328			FALSE	FALSE	FALSE	BMI	0.4721	0.0456	outcome	TRUE	reported	1.94984e-23	0.0250612	exposure	TRUE	reported	2	TRUE	28368
rs6059848	BMI	MLP3A	Ferkingstad	Wald ratio	1	0.118	0.156	0.449403	0.931963	T	C	T	C	0.05	0.0059			FALSE	FALSE	FALSE	BMI	0.4493	0.0078	outcome	TRUE	reported	1.86209e-10	0.00784645	exposure	TRUE	reported	2	TRUE	37612
rs3776081	BMI	PDGFRB	Suhre	Wald ratio	1	-0.00634755	0.00842872	0.451398	0.931963	T	C	T	C	-0.961	0.0061	0.32		FALSE	FALSE	FALSE	BMI	0.4525	0.0081	outcome	TRUE	reported	3.3e-113	0.037	exposure	TRUE	reported	2	TRUE	39724
rs783150	BMI	PLG	Suhre	Wald ratio	1	-0.0158607	0.02147	0.460066	0.931963	C	T	C	T	-0.517	0.0082	0.11		FALSE	FALSE	FALSE	BMI	0.4597	0.0111	outcome	TRUE	reported	8.7e-15	0.066	exposure	TRUE	reported	2	TRUE	39618
rs34180190	BMI	SMAD1	Ferkingstad	Wald ratio	1	0.116	0.158	0.462841	0.931963	G	A	G	A	0.05	0.0058			FALSE	FALSE	FALSE	BMI	0.4583	0.0079	outcome	TRUE	reported	1.77828e-09	0.00830998	exposure	TRUE	reported	2	TRUE	38160
rs741949	BMI	SUMO3	Ferkingstad	Wald ratio	1	-0.106667	0.148333	0.472079	0.931963	G	T	G	T	0.06	-0.0064			FALSE	FALSE	FALSE	BMI	0.4721	0.0089	outcome	TRUE	reported	3.23594e-12	0.00861193	exposure	TRUE	reported	2	TRUE	38668
rs1395319	BMI	TS101	Ferkingstad	Wald ratio	1	-0.038	0.0526667	0.47059	0.931963	G	T	G	T	0.15	-0.0057			FALSE	FALSE	FALSE	BMI	0.475	0.0079	outcome	TRUE	reported	2.13796e-66	0.00871457	exposure	TRUE	reported	2	TRUE	39617.9
rs62019074	BMI	UBP8	Ferkingstad	Wald ratio	1	0.08	0.107	0.454663	0.931963	C	T	C	T	0.1	0.008			FALSE	FALSE	FALSE	BMI	0.4565	0.0107	outcome	TRUE	reported	1.09648e-20	0.0107224	exposure	TRUE	reported	2	TRUE	38159.9
rs429017	BMI	C7	Suhre	Wald ratio	1	0.0138568	0.0196305	0.480261	0.937736	G	A	G	A	0.433	0.006	0.25		FALSE	FALSE	FALSE	BMI	0.4817	0.0085	outcome	TRUE	reported	9e-18	0.05	exposure	TRUE	reported	2	TRUE	39618
rs56665454	BMI	DBNL	Ferkingstad	Wald ratio	1	0.09	0.127143	0.479029	0.937736	T	C	T	C	0.07	0.0063			FALSE	FALSE	FALSE	BMI	0.4753	0.0089	outcome	TRUE	reported	1.90546e-17	0.00823586	exposure	TRUE	reported	2	TRUE	38159.9
rs1159798	BMI	Dkk-1	Folkersen	Wald ratio	2	-0.0307236	0.0432254	0.477223	0.937736	A	C	A	C	-0.12	0.003			FALSE	FALSE	FALSE	BMI	0.7416	0.0091	outcome	TRUE	reported	7.7e-18	0.014	exposure	TRUE	reported	2	TRUE	39722
rs9471969	BMI	CNPY3	Ferkingstad	Wald ratio	1	0.045	0.0642857	0.483927	0.941459	T	G	T	G	-0.14	-0.0063			FALSE	FALSE	FALSE	BMI	0.4868	0.009	outcome	TRUE	reported	2.0893e-54	0.00901333	exposure	TRUE	reported	2	TRUE	37613
rs17817077	BMI	CNDP1	Suhre	Wald ratio	1	-0.0154286	0.0222857	0.488744	0.947384	G	A	G	A	0.35	-0.0054	0.41		FALSE	FALSE	FALSE	BMI	0.4852	0.0078	outcome	TRUE	reported	4.7e-15	0.044	exposure	TRUE	reported	2	TRUE	39723
rs3763267	BMI	THBS2	Suhre	Wald ratio	1	-0.0143328	0.0209226	0.493319	0.9528	T	C	T	C	0.607	-0.0087	0.11		FALSE	FALSE	FALSE	BMI	0.491	0.0127	outcome	TRUE	reported	8.6e-19	0.067	exposure	TRUE	reported	2	TRUE	38267
rs8103941	BMI	KLK12	Suhre	Wald ratio	1	0.00838972	0.0124493	0.500367	0.959484	A	G	A	G	0.739	0.0062	0.25		FALSE	FALSE	FALSE	BMI	0.502	0.0092	outcome	TRUE	reported	5.3e-50	0.047	exposure	TRUE	reported	2	TRUE	38160
rs9859018	BMI	PTX3	Folkersen	Wald ratio	1	0.058	0.086	0.500045	0.959484	A	G	A	G	0.1	0.0058			FALSE	FALSE	FALSE	BMI	0.4991	0.0086	outcome	TRUE	reported	4e-14	0.014	exposure	TRUE	reported	2	TRUE	39618
rs4453827	BMI	IL17RB	Suhre	Wald ratio	1	0.0183183	0.0273273	0.502648	0.960416	T	C	T	C	0.333	0.0061	0.24		FALSE	FALSE	FALSE	BMI	0.5043	0.0091	outcome	TRUE	reported	6.4e-11	0.05	exposure	TRUE	reported	2	TRUE	39618
rs1637732	BMI	8ODP	Ferkingstad	Wald ratio	1	0.0521622	0.0808108	0.518613	0.961092	C	T	C	T	-0.37	-0.0193			FALSE	FALSE	FALSE	BMI	0.5186	0.0299	outcome	TRUE	reported	6.91831e-16	0.0458377	exposure	TRUE	reported	2	TRUE	26730
rs17114671	BMI	ANG	Suhre	Wald ratio	1	-0.00744417	0.0152605	0.625688	0.961092	T	C	T	C	0.806	-0.006	0.12		FALSE	FALSE	FALSE	BMI	0.6274	0.0123	outcome	TRUE	reported	1.9e-38	0.06	exposure	TRUE	reported	2	TRUE	39618
rs145488887	BMI	ANP	Ferkingstad	Wald ratio	1	0.0669231	0.121538	0.581885	0.961092	C	T	C	T	0.13	0.0087			FALSE	FALSE	FALSE	BMI	0.5806	0.0158	outcome	TRUE	reported	4.16869e-12	0.0187554	exposure	TRUE	reported	2	TRUE	39618
rs12079353	BMI	APCS	Suhre	Wald ratio	1	0.0137097	0.027765	0.621464	0.961092	C	A	C	A	-0.868	-0.0119	0.02		FALSE	FALSE	FALSE	BMI	0.6203	0.0241	outcome	TRUE	reported	6.3e-11	0.131	exposure	TRUE	reported	2	TRUE	39617.9
rs1383251	BMI	ARMET	Ferkingstad	Wald ratio	1	-0.0566667	0.122222	0.642908	0.961092	G	A	G	A	-0.09	0.0051			FALSE	FALSE	FALSE	BMI	0.6456	0.011	outcome	TRUE	reported	3.0903e-13	0.012345	exposure	TRUE	reported	2	TRUE	39618
rs672413	BMI	ARSB	Suhre	Wald ratio	1	-0.0116531	0.0224932	0.604408	0.961092	G	A	G	A	0.369	-0.0043	0.35		FALSE	FALSE	FALSE	BMI	0.6077	0.0083	outcome	TRUE	reported	3.6e-16	0.045	exposure	TRUE	reported	2	TRUE	38774
rs116897071	BMI	ATS15	Ferkingstad	Wald ratio	1	0.0771875	0.148438	0.603064	0.961092	C	T	C	T	0.32	0.0247			FALSE	FALSE	FALSE	BMI	0.6037	0.0475	outcome	TRUE	reported	1.51356e-15	0.0401212	exposure	TRUE	reported	2	TRUE	26609
rs2616262	BMI	BSP	Ferkingstad	Wald ratio	1	-0.0422222	0.0844444	0.617075	0.961092	T	G	T	G	-0.09	0.0038			FALSE	FALSE	FALSE	BMI	0.6169	0.0076	outcome	TRUE	reported	3.54813e-31	0.00775007	exposure	TRUE	reported	2	TRUE	39618
rs6697763	BMI	CA6	Suhre	Wald ratio	1	-0.00845865	0.0161654	0.600796	0.961092	C	T	C	T	0.532	-0.0045	0.34		FALSE	FALSE	FALSE	BMI	0.5995	0.0086	outcome	TRUE	reported	3e-37	0.04	exposure	TRUE	reported	2	TRUE	37316
rs2284367	BMI	CAT	Suhre	Wald ratio	1	0.0113503	0.0181996	0.532854	0.961092	T	C	T	C	-0.511	-0.0058	0.22		FALSE	FALSE	FALSE	BMI	0.5326	0.0093	outcome	TRUE	reported	4.1e-25	0.048	exposure	TRUE	reported	2	TRUE	37851
rs4973334	BMI	CCL20	Folkersen	Wald ratio	1	0.0413793	0.0908046	0.648608	0.961092	T	C	T	C	-0.087	-0.0036			FALSE	FALSE	FALSE	BMI	0.6451	0.0079	outcome	TRUE	reported	9e-15	0.011	exposure	TRUE	reported	2	TRUE	39618
rs7703662	BMI	CCL28	Ferkingstad	Wald ratio	1	0.075	0.131667	0.568935	0.961092	T	G	T	G	0.06	0.0045			FALSE	FALSE	FALSE	BMI	0.5681	0.0079	outcome	TRUE	reported	1.94984e-11	0.00894224	exposure	TRUE	reported	2	TRUE	37210
rs3138036	BMI	CCL7	Suhre	Wald ratio	1	-0.0052	0.0102	0.610189	0.961092	A	G	A	G	-1	0.0052	0.15		FALSE	FALSE	FALSE	BMI	0.6115	0.0102	outcome	TRUE	reported	1.8e-69	0.052	exposure	TRUE	reported	2	TRUE	39724
rs3138036	BMI	CCL8	Suhre	Wald ratio	1	-0.0110638	0.0217021	0.610189	0.961092	A	G	A	G	-0.47	0.0052	0.15		FALSE	FALSE	FALSE	BMI	0.6115	0.0102	outcome	TRUE	reported	1.3e-14	0.06	exposure	TRUE	reported	2	TRUE	39724
rs10737680	BMI	CFH	Suhre	Wald ratio	1	0.00865191	0.0162978	0.595513	0.961092	A	C	A	C	0.497	0.0043	0.42		FALSE	FALSE	FALSE	BMI	0.5953	0.0081	outcome	TRUE	reported	1.3e-36	0.038	exposure	TRUE	reported	2	TRUE	35505
rs12602950	BMI	CN37	Ferkingstad	Wald ratio	1	-0.04875	0.1075	0.650197	0.961092	G	A	G	A	-0.08	0.0039			FALSE	FALSE	FALSE	BMI	0.6469	0.0086	outcome	TRUE	reported	1.12202e-19	0.00881405	exposure	TRUE	reported	2	TRUE	38160
rs4951168	BMI	CNTN2	Suhre	Wald ratio	1	0.00853503	0.0147771	0.563544	0.961092	T	C	T	C	0.785	0.0067	0.15		FALSE	FALSE	FALSE	BMI	0.5628	0.0116	outcome	TRUE	reported	2.1e-39	0.057	exposure	TRUE	reported	2	TRUE	37506
rs1461672	BMI	CNTN5	Suhre	Wald ratio	1	0.0115804	0.0192098	0.546617	0.961092	C	T	C	T	0.734	0.0085	0.06		FALSE	FALSE	FALSE	BMI	0.5462	0.0141	outcome	TRUE	reported	2.2e-18	0.082	exposure	TRUE	reported	2	TRUE	39617.9
rs6114248	BMI	CST1	Suhre	Wald ratio	1	0.00851064	0.0143617	0.553454	0.961092	G	A	G	A	0.564	0.0048	0.32		FALSE	FALSE	FALSE	BMI	0.5544	0.0081	outcome	TRUE	reported	5e-37	0.043	exposure	TRUE	reported	2	TRUE	39618.1
rs6114248	BMI	CST2	Suhre	Wald ratio	1	0.00932039	0.0157282	0.553454	0.961092	G	A	G	A	0.515	0.0048	0.32		FALSE	FALSE	FALSE	BMI	0.5544	0.0081	outcome	TRUE	reported	4.4e-31	0.043	exposure	TRUE	reported	2	TRUE	39618.1
rs6036478	BMI	CST3	Suhre	Wald ratio	1	0.0150895	0.0230179	0.51211	0.961092	C	A	C	A	-0.391	-0.0059	0.21		FALSE	FALSE	FALSE	BMI	0.5125	0.009	outcome	TRUE	reported	9.6e-15	0.05	exposure	TRUE	reported	2	TRUE	39704
rs683544	BMI	CX3CL1	Folkersen	Wald ratio	1	-0.0235	0.0395	0.551886	0.961092	T	C	T	C	-0.2	0.0047			FALSE	FALSE	FALSE	BMI	0.55	0.0079	outcome	TRUE	reported	2.8e-73	0.011	exposure	TRUE	reported	2	TRUE	38159.9
rs7527761	BMI	Cysteine-rich protein 1	Ferkingstad	Wald ratio	1	0.049	0.082	0.550133	0.961092	C	T	C	T	-0.1	-0.0049			FALSE	FALSE	FALSE	BMI	0.5515	0.0082	outcome	TRUE	reported	1.14815e-27	0.00917402	exposure	TRUE	reported	2	TRUE	38160
rs11022119	BMI	DKK3	Suhre	Wald ratio	1	-0.0151515	0.0272727	0.578515	0.961092	G	A	G	A	0.33	-0.005	0.28		FALSE	FALSE	FALSE	BMI	0.5772	0.009	outcome	TRUE	reported	2.8e-13	0.045	exposure	TRUE	reported	2	TRUE	38160
rs2237045	BMI	EGF	Folkersen	Wald ratio	1	0.04	0.0615385	0.515692	0.961092	A	G	A	G	-0.13	-0.0052			FALSE	FALSE	FALSE	BMI	0.5194	0.008	outcome	TRUE	reported	2e-13	0.018	exposure	TRUE	reported	2	TRUE	39617.9
rs3014874	BMI	EN-RAGE	Folkersen	Wald ratio	1	0.0294118	0.0570588	0.606229	0.961092	A	G	A	G	-0.17	-0.005			FALSE	FALSE	FALSE	BMI	0.6062	0.0097	outcome	TRUE	reported	1.6e-29	0.015	exposure	TRUE	reported	2	TRUE	37608.9
rs12074120	BMI	EPHAA	Ferkingstad	Wald ratio	1	0.0725	0.11125	0.514604	0.961092	G	T	G	T	0.08	0.0058			FALSE	FALSE	FALSE	BMI	0.5167	0.0089	outcome	TRUE	reported	1.12202e-18	0.009068	exposure	TRUE	reported	2	TRUE	38160
rs6687487	BMI	EPHB2	Suhre	Wald ratio	1	-0.0124764	0.0241966	0.606116	0.961092	G	A	G	A	-0.529	0.0066	0.09		FALSE	FALSE	FALSE	BMI	0.6042	0.0128	outcome	TRUE	reported	3.5e-12	0.075	exposure	TRUE	reported	2	TRUE	39725
rs11219769	BMI	ESAM	Suhre	Wald ratio	1	-0.0161194	0.0259701	0.534804	0.961092	G	T	G	T	-0.335	0.0054	0.25		FALSE	FALSE	FALSE	BMI	0.5355	0.0087	outcome	TRUE	reported	7.8e-12	0.048	exposure	TRUE	reported	2	TRUE	39618
rs78185702	BMI	ETFA	Ferkingstad	Wald ratio	1	-0.0777778	0.138889	0.575479	0.961092	T	C	T	C	0.09	-0.007			FALSE	FALSE	FALSE	BMI	0.5752	0.0125	outcome	TRUE	reported	7.4131e-12	0.0131397	exposure	TRUE	reported	2	TRUE	39618.1
rs3136516	BMI	F2	Niu	Wald ratio	1	-0.0138613	0.0264026	0.599583	0.961092	G	A	G	A	-0.303001	0.0042			FALSE	FALSE	FALSE	BMI	0.6026	0.008	outcome	TRUE	reported	9.2421e-21	0.0320512	exposure	TRUE	reported	2	TRUE	37235
rs1557571	BMI	F5	Niu	MR Egger	4	0.0244021	0.0401221	0.604926	0.961092	T	C	T	C	-0.733484	-0.0044			FALSE	FALSE	FALSE	BMI	0.7809	0.0157	outcome	TRUE	reported	1.69184e-25	0.0692712	exposure	TRUE	reported	2	TRUE	39618.1
rs1047115	BMI	FETUB	Niu	Inverse variance weighted	2	-0.0136421	0.0288721	0.636568	0.961092	A	C	A	C	-0.300054	0.0035			FALSE	FALSE	FALSE	BMI	0.793	0.0132	outcome	TRUE	reported	5.1439e-10	0.0480311	exposure	TRUE	reported	2	TRUE	38160
rs72679193	BMI	FGA	Niu	Wald ratio	1	-0.0248146	0.0422284	0.556781	0.961092	A	G	A	G	0.229703	-0.0057			FALSE	FALSE	FALSE	BMI	0.5581	0.0097	outcome	TRUE	reported	1.56562e-08	0.0404497	exposure	TRUE	reported	2	TRUE	39618
rs138865936	BMI	FLII	Ferkingstad	Wald ratio	1	0.0732	0.1172	0.532251	0.961092	T	C	T	C	0.25	0.0183			FALSE	FALSE	FALSE	BMI	0.5331	0.0293	outcome	TRUE	reported	1.02329e-21	0.026111	exposure	TRUE	reported	2	TRUE	37476.9
rs6678766	BMI	FUMH	Ferkingstad	Wald ratio	1	0.03	0.0566667	0.59652	0.961092	A	G	A	G	-0.15	-0.0045			FALSE	FALSE	FALSE	BMI	0.5986	0.0085	outcome	TRUE	reported	2.18776e-64	0.0088535	exposure	TRUE	reported	2	TRUE	39721
rs1153858	BMI	GATM	Ferkingstad	Wald ratio	1	0.0233333	0.0472222	0.621223	0.961092	T	C	T	C	-0.18	-0.0042			FALSE	FALSE	FALSE	BMI	0.6173	0.0085	outcome	TRUE	reported	7.58578e-86	0.00916674	exposure	TRUE	reported	2	TRUE	39618
rs4443656	BMI	GFRA2	Suhre	Wald ratio	1	-0.0101737	0.0191067	0.594402	0.961092	A	G	A	G	0.403	-0.0041	0.42		FALSE	FALSE	FALSE	BMI	0.59	0.0077	outcome	TRUE	reported	2.2e-19	0.044	exposure	TRUE	reported	2	TRUE	38799
rs7534175	BMI	GGPPS	Ferkingstad	Wald ratio	1	0.0438462	0.09	0.626131	0.961092	G	A	G	A	0.13	0.0057			FALSE	FALSE	FALSE	BMI	0.6255	0.0117	outcome	TRUE	reported	2.81838e-28	0.0117888	exposure	TRUE	reported	2	TRUE	39618
rs16834610	BMI	GLT13	Ferkingstad	Wald ratio	1	0.0869231	0.133846	0.516064	0.961092	T	C	T	C	0.13	0.0113			FALSE	FALSE	FALSE	BMI	0.5145	0.0174	outcome	TRUE	reported	1.25893e-11	0.0191931	exposure	TRUE	reported	2	TRUE	39618
rs10946702	BMI	GPLD1	Niu	Wald ratio	1	0.0163616	0.0347684	0.637935	0.961092	C	T	C	T	0.244475	0.004			FALSE	FALSE	FALSE	BMI	0.6378	0.0085	outcome	TRUE	reported	5.83178e-12	0.03529	exposure	TRUE	reported	2	TRUE	38160
rs3759074	BMI	HBG1	Niu	Inverse variance weighted	2	-0.0136877	0.0281672	0.627005	0.961092	G	A	G	A	-0.218432	0.0025			FALSE	FALSE	FALSE	BMI	0.7752	0.0086	outcome	TRUE	reported	6.0399e-10	0.0351096	exposure	TRUE	reported	2	TRUE	38160
rs9919979	BMI	HDGR3	Ferkingstad	Wald ratio	1	0.0522222	0.0811111	0.519682	0.961092	A	C	A	C	0.18	0.0094			FALSE	FALSE	FALSE	BMI	0.5198	0.0146	outcome	TRUE	reported	6.76083e-29	0.0161361	exposure	TRUE	reported	2	TRUE	39618
rs1256430	BMI	HOME2	Ferkingstad	Wald ratio	1	0.0566667	0.115556	0.623862	0.961092	A	G	A	G	-0.09	-0.0051			FALSE	FALSE	FALSE	BMI	0.6263	0.0104	outcome	TRUE	reported	3.38844e-16	0.0110313	exposure	TRUE	reported	2	TRUE	38771
rs2731168	BMI	IGHV4-34	Niu	Inverse variance weighted	2	-0.0137564	0.021867	0.529286	0.961092	T	C	T	C	0.423087	-0.0124			FALSE	FALSE	FALSE	BMI	0.1271	0.0081	outcome	TRUE	reported	9.92401e-37	0.0327167	exposure	TRUE	reported	2	TRUE	38002
rs429774	BMI	IL-12 Rb1	Ferkingstad	Wald ratio	1	-0.05875	0.1	0.556868	0.961092	C	T	C	T	-0.08	0.0047			FALSE	FALSE	FALSE	BMI	0.5579	0.008	outcome	TRUE	reported	3.46737e-20	0.00869242	exposure	TRUE	reported	2	TRUE	39724
rs4905	BMI	IL-27	Folkersen	Wald ratio	1	0.00701493	0.0125373	0.575804	0.961092	A	G	A	G	0.67	0.0047			FALSE	FALSE	FALSE	BMI	0.5779	0.0084	outcome	TRUE	reported	1e-200	0.01	exposure	TRUE	reported	2	TRUE	39618
rs376008	BMI	IL12RB1	Suhre	Wald ratio	1	0.00528402	0.0108322	0.625688	0.961092	C	T	C	T	-0.757	-0.004	0.34		FALSE	FALSE	FALSE	BMI	0.6261	0.0082	outcome	TRUE	reported	6.3e-69	0.04	exposure	TRUE	reported	2	TRUE	39617.9
rs7097780	BMI	IL15RA	Suhre	Wald ratio	1	0.0152941	0.0235294	0.515692	0.961092	A	G	A	G	0.34	0.0052	0.34		FALSE	FALSE	FALSE	BMI	0.5129	0.008	outcome	TRUE	reported	3.8e-14	0.044	exposure	TRUE	reported	2	TRUE	39725
rs2058622	BMI	IL18R1	Suhre	Wald ratio	1	-0.00472362	0.00944724	0.617075	0.961092	G	A	G	A	0.995	-0.0047	0.23		FALSE	FALSE	FALSE	BMI	0.6185	0.0094	outcome	TRUE	reported	9e-108	0.04	exposure	TRUE	reported	2	TRUE	37035
rs2290610	BMI	IL5RA	Suhre	Wald ratio	1	0.0118609	0.0192229	0.537221	0.961092	T	C	T	C	0.489	0.0058	0.36		FALSE	FALSE	FALSE	BMI	0.5343	0.0094	outcome	TRUE	reported	7.6e-28	0.043	exposure	TRUE	reported	2	TRUE	34173
rs7730934	BMI	IL6ST	Suhre	Wald ratio	1	-0.0115865	0.0204991	0.571926	0.961092	G	A	G	A	0.561	-0.0065	0.11		FALSE	FALSE	FALSE	BMI	0.5701	0.0115	outcome	TRUE	reported	2.6e-15	0.07	exposure	TRUE	reported	2	TRUE	39618
rs1630171	BMI	ISK4	Ferkingstad	Wald ratio	1	-0.02	0.0378571	0.59729	0.961092	G	A	G	A	0.28	-0.0056			FALSE	FALSE	FALSE	BMI	0.5979	0.0106	outcome	TRUE	reported	6.60693e-139	0.0111604	exposure	TRUE	reported	2	TRUE	39618
rs181769	BMI	Integrin alpha-2	Ferkingstad	Wald ratio	1	0.0488889	0.09	0.586985	0.961092	C	A	C	A	0.09	0.0044			FALSE	FALSE	FALSE	BMI	0.5863	0.0081	outcome	TRUE	reported	1.47911e-28	0.00811889	exposure	TRUE	reported	2	TRUE	38668.1
rs12884809	BMI	KLC1	Ferkingstad	Wald ratio	1	-0.05	0.0888889	0.573775	0.961092	A	G	A	G	0.09	-0.0045			FALSE	FALSE	FALSE	BMI	0.5703	0.008	outcome	TRUE	reported	1.34896e-24	0.00879135	exposure	TRUE	reported	2	TRUE	39618
rs11589734	BMI	KS6A1	Ferkingstad	Wald ratio	1	-0.037	0.078	0.635244	0.961092	G	A	G	A	-0.1	0.0037			FALSE	FALSE	FALSE	BMI	0.6387	0.0078	outcome	TRUE	reported	4.2658e-54	0.00645715	exposure	TRUE	reported	2	TRUE	38159.9
rs17415296	BMI	LEPR	Suhre	Wald ratio	1	-0.00392857	0.00735714	0.593355	0.961092	C	A	C	A	-1.4	0.0055	0.19		FALSE	FALSE	FALSE	BMI	0.5891	0.0103	outcome	TRUE	reported	1e-200	0.033	exposure	TRUE	reported	2	TRUE	39618
rs7959452	BMI	LYZ	Suhre	Wald ratio	1	0.00551416	0.0113264	0.62637	0.961092	A	G	A	G	-0.671	-0.0037	0.5		FALSE	FALSE	FALSE	BMI	0.6215	0.0076	outcome	TRUE	reported	1.2e-60	0.038	exposure	TRUE	reported	2	TRUE	39618
rs471994	BMI	MMP-1	Folkersen	Wald ratio	1	0.0105556	0.0219444	0.630508	0.961092	A	G	A	G	-0.36	-0.0038			FALSE	FALSE	FALSE	BMI	0.6335	0.0079	outcome	TRUE	reported	1e-200	0.011	exposure	TRUE	reported	2	TRUE	39618
rs181929025	BMI	MXRA8	Ferkingstad	Wald ratio	1	-0.0597059	0.0932353	0.521927	0.961092	T	C	T	C	-0.34	0.0203			FALSE	FALSE	FALSE	BMI	0.5208	0.0317	outcome	TRUE	reported	2.39883e-22	0.0349676	exposure	TRUE	reported	2	TRUE	31462.9
rs7244879	BMI	Maspin	Ferkingstad	Wald ratio	1	-0.0335714	0.0578571	0.561748	0.961092	A	G	A	G	-0.14	0.0047			FALSE	FALSE	FALSE	BMI	0.5598	0.0081	outcome	TRUE	reported	4.57088e-63	0.00835186	exposure	TRUE	reported	2	TRUE	39618
rs12449302	BMI	OMGP	Ferkingstad	Wald ratio	1	0.0591667	0.0958333	0.536977	0.961092	C	T	C	T	-0.12	-0.0071			FALSE	FALSE	FALSE	BMI	0.5389	0.0115	outcome	TRUE	reported	1.62181e-27	0.0110407	exposure	TRUE	reported	2	TRUE	38267
rs9326248	BMI	PCSK7	Suhre	Wald ratio	1	0.00422961	0.00876133	0.629267	0.961092	G	T	G	T	-0.993	-0.0042	0.24		FALSE	FALSE	FALSE	BMI	0.6303	0.0087	outcome	TRUE	reported	1.7e-105	0.04	exposure	TRUE	reported	2	TRUE	39618
rs2292260	BMI	PDLI4	Ferkingstad	Wald ratio	1	0.0280769	0.0503846	0.577355	0.961092	A	G	A	G	-0.26	-0.0073			FALSE	FALSE	FALSE	BMI	0.5776	0.0131	outcome	TRUE	reported	5.24807e-66	0.0151511	exposure	TRUE	reported	2	TRUE	38772
rs13283456	BMI	PGES2	Ferkingstad	Wald ratio	1	0.068	0.114	0.550847	0.961092	T	C	T	C	-0.1	-0.0068			FALSE	FALSE	FALSE	BMI	0.5478	0.0114	outcome	TRUE	reported	6.16595e-21	0.0106529	exposure	TRUE	reported	2	TRUE	35204
rs17354650	BMI	PLA2G2A	Suhre	Wald ratio	1	0.0117978	0.0238764	0.621223	0.961092	C	T	C	T	0.356	0.0042	0.28		FALSE	FALSE	FALSE	BMI	0.6237	0.0085	outcome	TRUE	reported	1.7e-14	0.046	exposure	TRUE	reported	2	TRUE	38266
rs17266357	BMI	PPP3CA PPP3R1	Suhre	Wald ratio	1	0.0108696	0.0217391	0.617075	0.961092	T	C	T	C	0.368	0.004	0.31		FALSE	FALSE	FALSE	BMI	0.6201	0.008	outcome	TRUE	reported	8.7e-16	0.045	exposure	TRUE	reported	2	TRUE	39618
rs4699179	BMI	PPase 2	Ferkingstad	Wald ratio	1	0.045	0.096	0.639248	0.961092	A	G	A	G	0.1	0.0045			FALSE	FALSE	FALSE	BMI	0.6406	0.0096	outcome	TRUE	reported	3.46737e-31	0.00860973	exposure	TRUE	reported	2	TRUE	38160
rs61754230	BMI	RAB21	Ferkingstad	Wald ratio	1	-0.0748485	0.162424	0.644927	0.961092	T	C	T	C	-0.33	0.0247			FALSE	FALSE	FALSE	BMI	0.6455	0.0536	outcome	TRUE	reported	3.23594e-25	0.0318085	exposure	TRUE	reported	2	TRUE	22833
rs35827173	BMI	RD23B	Ferkingstad	Wald ratio	1	0.075	0.155	0.628477	0.961092	C	T	C	T	0.06	0.0045			FALSE	FALSE	FALSE	BMI	0.632	0.0093	outcome	TRUE	reported	1.07152e-10	0.00929296	exposure	TRUE	reported	2	TRUE	38668.1
rs10401670	BMI	RETN	Folkersen	Wald ratio	1	0.0306667	0.0673333	0.648789	0.961092	T	C	T	C	0.15	0.0046			FALSE	FALSE	FALSE	BMI	0.6514	0.0101	outcome	TRUE	reported	9e-37	0.012	exposure	TRUE	reported	2	TRUE	35219.1
rs4495675	BMI	RGS18	Ferkingstad	Wald ratio	1	0.0683333	0.128333	0.594402	0.961092	T	G	T	G	0.06	0.0041			FALSE	FALSE	FALSE	BMI	0.5931	0.0077	outcome	TRUE	reported	7.94328e-12	0.00877248	exposure	TRUE	reported	2	TRUE	38160
rs2749530	BMI	SERPINA6	Niu	Inverse variance weighted	2	0.0168383	0.0255905	0.510545	0.961092	A	G	A	G	-0.23697	-0.0048			FALSE	FALSE	FALSE	BMI	0.5283	0.0076	outcome	TRUE	reported	2.3524e-13	0.0321101	exposure	TRUE	reported	2	TRUE	39618
rs2124910	BMI	SIGLEC6	Suhre	Wald ratio	1	-0.00520674	0.0114855	0.650309	0.961092	C	T	C	T	0.653	-0.0034	0.41		FALSE	FALSE	FALSE	BMI	0.6477	0.0075	outcome	TRUE	reported	2.7e-46	0.043	exposure	TRUE	reported	2	TRUE	39722
rs8112211	BMI	SPINT2	Suhre	Wald ratio	1	-0.00527983	0.00887012	0.551684	0.961092	C	T	C	T	-0.947	0.005	0.26		FALSE	FALSE	FALSE	BMI	0.5534	0.0084	outcome	TRUE	reported	1e-88	0.043	exposure	TRUE	reported	2	TRUE	39725
rs2293772	BMI	Serpin B1	Ferkingstad	Wald ratio	1	0.0525	0.10125	0.604097	0.961092	A	G	A	G	-0.08	-0.0042			FALSE	FALSE	FALSE	BMI	0.6016	0.0081	outcome	TRUE	reported	6.30957e-22	0.00831224	exposure	TRUE	reported	2	TRUE	37609
rs116350534	BMI	TFPI	Ferkingstad	Wald ratio	1	0.0811111	0.149259	0.586838	0.961092	G	T	G	T	-0.27	-0.0219			FALSE	FALSE	FALSE	BMI	0.5873	0.0403	outcome	TRUE	reported	9.54993e-11	0.0417059	exposure	TRUE	reported	2	TRUE	29257
rs4986791	BMI	TLR4 LY96	Suhre	Wald ratio	1	-0.00583136	0.0122931	0.635244	0.961092	C	T	C	T	-1.269	0.0074	0.07		FALSE	FALSE	FALSE	BMI	0.6343	0.0156	outcome	TRUE	reported	1.8e-50	0.08	exposure	TRUE	reported	2	TRUE	38404
rs4915486	BMI	TMEM9	Ferkingstad	Wald ratio	1	-0.0514286	0.11	0.640119	0.961092	T	C	T	C	0.07	-0.0036			FALSE	FALSE	FALSE	BMI	0.6453	0.0077	outcome	TRUE	reported	2.63027e-15	0.00885258	exposure	TRUE	reported	2	TRUE	39618
rs2293400	BMI	TRAIL-R2	Folkersen	Wald ratio	1	0.0541667	0.0825	0.51146	0.961092	A	T	A	T	-0.31	0.0191			FALSE	TRUE	TRUE	BMI	0.02308	0.0084	outcome	TRUE	reported	3.4e-152	0.012	exposure	TRUE	reported	2	FALSE	38160
rs34221241	BMI	VEGF sR3	Ferkingstad	Wald ratio	1	0.0384211	0.0842105	0.64821	0.961092	C	T	C	T	-0.19	-0.0073			FALSE	FALSE	FALSE	BMI	0.6489	0.016	outcome	TRUE	reported	3.54813e-58	0.0118162	exposure	TRUE	reported	2	TRUE	33652
rs4501820	BMI	lymphotactin beta	Ferkingstad	Wald ratio	1	0.0914286	0.17	0.590705	0.961092	T	C	T	C	0.07	0.0064			FALSE	FALSE	FALSE	BMI	0.5901	0.0119	outcome	TRUE	reported	3.16228e-14	0.00922084	exposure	TRUE	reported	2	TRUE	38160
rs198389	BMI	BNP	Ferkingstad	Wald ratio	1	0.0377778	0.0877778	0.666919	0.96173	G	A	G	A	0.09	0.0034			FALSE	FALSE	FALSE	BMI	0.6629	0.0079	outcome	TRUE	reported	2.18776e-29	0.00799643	exposure	TRUE	reported	2	TRUE	38160
rs12141375	BMI	CHIT1	Suhre	Wald ratio	1	-0.00414141	0.00949495	0.662713	0.96173	C	A	C	A	-0.99	0.0041	0.2		FALSE	FALSE	FALSE	BMI	0.6646	0.0094	outcome	TRUE	reported	9.3e-108	0.039	exposure	TRUE	reported	2	TRUE	39722
rs5850	BMI	GPNMB	Suhre	Wald ratio	1	-0.0103858	0.0240356	0.66567	0.96173	C	T	C	T	-0.337	0.0035	0.39		FALSE	FALSE	FALSE	BMI	0.6699	0.0081	outcome	TRUE	reported	8.1e-14	0.044	exposure	TRUE	reported	2	TRUE	38160
rs4704846	BMI	HAVCR2	Suhre	Wald ratio	1	-0.00640466	0.0147016	0.663095	0.96173	A	G	A	G	0.687	-0.0044	0.19		FALSE	FALSE	FALSE	BMI	0.6623	0.0101	outcome	TRUE	reported	1.8e-39	0.05	exposure	TRUE	reported	2	TRUE	38160.1
rs56307603	BMI	LCN1	Ferkingstad	Wald ratio	1	0.0533333	0.122222	0.662573	0.96173	C	T	C	T	-0.09	-0.0048			FALSE	FALSE	FALSE	BMI	0.6627	0.011	outcome	TRUE	reported	9.54993e-17	0.01083	exposure	TRUE	reported	2	TRUE	38160
rs9919018	BMI	Myokinase, human	Ferkingstad	Wald ratio	1	0.075	0.168333	0.655926	0.96173	A	G	A	G	-0.06	-0.0045			FALSE	FALSE	FALSE	BMI	0.6546	0.0101	outcome	TRUE	reported	2.04174e-10	0.00943668	exposure	TRUE	reported	2	TRUE	38160
rs198389	BMI	NT-pro_BNP	Folkersen	Wald ratio	1	0.0161905	0.037619	0.666919	0.96173	A	G	A	G	-0.21	-0.0034			FALSE	FALSE	FALSE	BMI	0.6629	0.0079	outcome	TRUE	reported	4.4e-41	0.016	exposure	TRUE	reported	2	TRUE	38160
rs7250849	BMI	SIGLEC14	Suhre	Wald ratio	1	0.00422764	0.0095122	0.656721	0.96173	G	T	G	T	-1.23	-0.0052	0.12		FALSE	FALSE	FALSE	BMI	0.6596	0.0117	outcome	TRUE	reported	4.3e-82	0.058	exposure	TRUE	reported	2	TRUE	38267
rs1995640	BMI	TGM4	Ferkingstad	Wald ratio	1	0.066	0.152	0.664136	0.96173	T	C	T	C	-0.05	-0.0033			FALSE	FALSE	FALSE	BMI	0.6637	0.0076	outcome	TRUE	reported	2.34423e-10	0.00789028	exposure	TRUE	reported	2	TRUE	39618
rs77326813	BMI	ADH1A	Ferkingstad	Wald ratio	1	-0.0266667	0.0643333	0.678502	0.965422	T	C	T	C	-0.6	0.016			FALSE	FALSE	FALSE	BMI	0.6787	0.0386	outcome	TRUE	reported	4.2658e-52	0.0395056	exposure	TRUE	reported	2	TRUE	28365
rs982764	BMI	FAS	Folkersen	Wald ratio	1	0.0136	0.0328	0.67841	0.965422	T	C	T	C	0.25	0.0034			FALSE	FALSE	FALSE	BMI	0.6794	0.0082	outcome	TRUE	reported	1.5e-132	0.01	exposure	TRUE	reported	2	TRUE	38265
rs11260013	BMI	FCER2	Suhre	Wald ratio	1	-0.0097561	0.0231707	0.673717	0.965422	C	T	C	T	-0.328	0.0032	0.49		FALSE	FALSE	FALSE	BMI	0.6754	0.0076	outcome	TRUE	reported	3.9e-14	0.043	exposure	TRUE	reported	2	TRUE	39618
rs1455434	BMI	MIA	Suhre	Wald ratio	2	0.0076777	0.0184006	0.676493	0.965422	G	T	G	T	1.111	-0.0051	0.05		FALSE	FALSE	FALSE	BMI	0.7897	0.0192	outcome	TRUE	reported	1.7e-28	0.097	exposure	TRUE	reported	2	TRUE	37851
rs17372936	BMI	PAPPA	Folkersen	Wald ratio	1	0.0425532	0.101064	0.673717	0.965422	T	C	T	C	0.094	0.004			FALSE	FALSE	FALSE	BMI	0.6769	0.0095	outcome	TRUE	reported	2.4e-12	0.013	exposure	TRUE	reported	2	TRUE	38160
rs11539938	BMI	AES	Ferkingstad	Wald ratio	1	-0.078	0.198	0.693626	0.968903	C	T	C	T	-0.05	0.0039			FALSE	FALSE	FALSE	BMI	0.6975	0.0099	outcome	TRUE	reported	5.37032e-11	0.00762161	exposure	TRUE	reported	2	TRUE	33677.9
rs1006026	BMI	CD30 Ligand	Ferkingstad	Wald ratio	1	0.0221429	0.0542857	0.683351	0.968903	G	A	G	A	-0.14	-0.0031			FALSE	FALSE	FALSE	BMI	0.6803	0.0076	outcome	TRUE	reported	4.89779e-63	0.0083539	exposure	TRUE	reported	2	TRUE	39618
rs2274611	BMI	CTSL1	Folkersen	Wald ratio	1	-0.025	0.0625	0.689157	0.968903	T	C	T	C	-0.12	0.003			FALSE	FALSE	FALSE	BMI	0.6894	0.0075	outcome	TRUE	reported	4.8e-30	0.01	exposure	TRUE	reported	2	TRUE	39719
rs31226	BMI	FS	Folkersen	Wald ratio	1	0.0230769	0.0584615	0.693037	0.968903	T	C	T	C	0.13	0.003			FALSE	FALSE	FALSE	BMI	0.6958	0.0076	outcome	TRUE	reported	1.6e-33	0.011	exposure	TRUE	reported	2	TRUE	39723
rs250727	BMI	PAR-1	Folkersen	Wald ratio	1	0.025	0.0633333	0.693037	0.968903	T	C	T	C	0.12	0.003			FALSE	FALSE	FALSE	BMI	0.6897	0.0076	outcome	TRUE	reported	1.2e-29	0.011	exposure	TRUE	reported	2	TRUE	39618
rs61762372	BMI	PKC-A	Ferkingstad	Wald ratio	1	0.04	0.1	0.689157	0.968903	A	G	A	G	0.08	0.0032			FALSE	FALSE	FALSE	BMI	0.6836	0.008	outcome	TRUE	reported	1.58489e-21	0.00839524	exposure	TRUE	reported	2	TRUE	38160
rs1158867	BMI	PROC	Niu	Wald ratio	1	0.0150411	0.0376028	0.689157	0.968903	C	T	C	T	0.21275	0.0032			FALSE	FALSE	FALSE	BMI	0.687	0.008	outcome	TRUE	reported	1.03376e-10	0.0327392	exposure	TRUE	reported	2	TRUE	36963.1
rs6138458	BMI	CST7	Suhre	Wald ratio	1	0.00498034	0.012844	0.698197	0.972749	G	A	G	A	-0.763	-0.0038	0.23		FALSE	FALSE	FALSE	BMI	0.7011	0.0098	outcome	TRUE	reported	7.6e-53	0.047	exposure	TRUE	reported	2	TRUE	38667.9
rs870825	BMI	CASP3	Suhre	Wald ratio	1	0.0108586	0.0290404	0.708469	0.976884	A	G	A	G	-0.396	-0.0043	0.16		FALSE	FALSE	FALSE	BMI	0.7105	0.0115	outcome	TRUE	reported	1.8e-11	0.058	exposure	TRUE	reported	2	TRUE	38160
rs308403	BMI	FGF2	Suhre	Wald ratio	1	0.00559322	0.0149153	0.70766	0.976884	C	T	C	T	-0.59	-0.0033	0.32		FALSE	FALSE	FALSE	BMI	0.7062	0.0088	outcome	TRUE	reported	5.8e-39	0.043	exposure	TRUE	reported	2	TRUE	38160
rs268891	BMI	KLK6	Folkersen	Wald ratio	1	-0.0173684	0.0463158	0.70766	0.976884	A	C	A	C	0.19	-0.0033			FALSE	FALSE	FALSE	BMI	0.7099	0.0088	outcome	TRUE	reported	2.2e-72	0.01	exposure	TRUE	reported	2	TRUE	37210
rs3745540	BMI	kallikrein 12	Ferkingstad	Wald ratio	1	-0.0214286	0.0564286	0.704133	0.976884	A	G	A	G	0.14	-0.003			FALSE	FALSE	FALSE	BMI	0.706	0.0079	outcome	TRUE	reported	4.16869e-63	0.00834913	exposure	TRUE	reported	2	TRUE	37058
rs7632402	BMI	A4GCT	Ferkingstad	Wald ratio	1	0.05	0.135	0.711107	0.977485	T	G	T	G	0.06	0.003			FALSE	FALSE	FALSE	BMI	0.7097	0.0081	outcome	TRUE	reported	1.47911e-14	0.00780302	exposure	TRUE	reported	2	TRUE	39618
rs7736592	BMI	XRCC4	Ferkingstad	Wald ratio	1	-0.028	0.076	0.712559	0.977485	A	G	A	G	0.15	-0.0042			FALSE	FALSE	FALSE	BMI	0.711	0.0114	outcome	TRUE	reported	2.95121e-36	0.0119298	exposure	TRUE	reported	2	TRUE	39618
rs4512994	BMI	TRANCE	Folkersen	Wald ratio	1	0.0233333	0.0641667	0.71613	0.97987	A	C	A	C	0.12	0.0028			FALSE	FALSE	FALSE	BMI	0.7141	0.0077	outcome	TRUE	reported	4.6e-29	0.011	exposure	TRUE	reported	2	TRUE	38160
rs4950931	BMI	CHI3L1	Folkersen	Wald ratio	1	-0.00492537	0.0137313	0.719823	0.980914	A	G	A	G	0.67	-0.0033			FALSE	FALSE	FALSE	BMI	0.7203	0.0092	outcome	TRUE	reported	1e-200	0.01	exposure	TRUE	reported	2	TRUE	39618
rs10832172	BMI	SPON1	Folkersen	Wald ratio	1	-0.0117391	0.0330435	0.722392	0.980914	T	C	T	C	-0.23	0.0027			FALSE	FALSE	FALSE	BMI	0.7241	0.0076	outcome	TRUE	reported	6.2e-94	0.011	exposure	TRUE	reported	2	TRUE	39618
rs9925556	BMI	U773	Ferkingstad	Wald ratio	1	0.0166667	0.0466667	0.720985	0.980914	C	T	C	T	-0.18	-0.003			FALSE	FALSE	FALSE	BMI	0.7211	0.0084	outcome	TRUE	reported	1e-103	0.00832291	exposure	TRUE	reported	2	TRUE	38160
rs507506	BMI	ACADV	Ferkingstad	Wald ratio	1	-0.052	0.156	0.738883	0.983339	A	G	A	G	0.05	-0.0026			FALSE	FALSE	FALSE	BMI	0.736	0.0078	outcome	TRUE	reported	1.14815e-09	0.00821379	exposure	TRUE	reported	2	TRUE	39618.1
rs4420638	BMI	APOE	Suhre	Wald ratio	1	0.00859189	0.0252983	0.734141	0.983339	A	G	A	G	0.419	0.0036	0.17		FALSE	FALSE	FALSE	BMI	0.7307	0.0106	outcome	TRUE	reported	1.9e-13	0.056	exposure	TRUE	reported	2	TRUE	37459
rs16971895	BMI	CCL3L1	Suhre	Wald ratio	1	-0.00863402	0.0253866	0.73378	0.983339	G	A	G	A	0.776	-0.0067	0.04		FALSE	FALSE	FALSE	BMI	0.7339	0.0197	outcome	TRUE	reported	1.2e-12	0.108	exposure	TRUE	reported	2	TRUE	39618
rs3742264	BMI	CPB2	Suhre	Wald ratio	1	-0.003298	0.00977621	0.735854	0.983339	C	T	C	T	0.849	-0.0028	0.32		FALSE	FALSE	FALSE	BMI	0.7313	0.0083	outcome	TRUE	reported	2.8e-83	0.04	exposure	TRUE	reported	2	TRUE	37506
rs374015	BMI	IGLV3-1	Niu	Inverse variance weighted	2	0.00693174	0.0204896	0.735133	0.983339	G	A	G	A	-0.335122	-0.0056			FALSE	FALSE	FALSE	BMI	0.5269	0.0088	outcome	TRUE	reported	2.13114e-19	0.0368098	exposure	TRUE	reported	2	TRUE	38160
rs2304456	BMI	KNG1	Suhre	Wald ratio	1	-0.00307467	0.00900439	0.732755	0.983339	T	G	T	G	-1.366	0.0042	0.1		FALSE	FALSE	FALSE	BMI	0.7349	0.0123	outcome	TRUE	reported	2.9e-97	0.058	exposure	TRUE	reported	2	TRUE	36154
rs4774967	BMI	MYZAP	Ferkingstad	Wald ratio	1	0.0414286	0.118571	0.726791	0.983339	T	G	T	G	0.07	0.0029			FALSE	FALSE	FALSE	BMI	0.7297	0.0083	outcome	TRUE	reported	1.90546e-18	0.00798836	exposure	TRUE	reported	2	TRUE	39618.1
rs3792900	BMI	TGFBI	Suhre	Wald ratio	1	0.00556793	0.0167038	0.738883	0.983339	T	C	T	C	0.449	0.0025	0.47		FALSE	FALSE	FALSE	BMI	0.745	0.0075	outcome	TRUE	reported	4.2e-29	0.039	exposure	TRUE	reported	2	TRUE	39618
rs33995560	BMI	CCL16	Suhre	Wald ratio	1	0.00358938	0.0111271	0.747013	0.989237	T	C	T	C	-1.393	-0.005	0.08		FALSE	FALSE	FALSE	BMI	0.7472	0.0155	outcome	TRUE	reported	1.9e-95	0.06	exposure	TRUE	reported	2	TRUE	39618
rs3786314	BMI	MARE2	Ferkingstad	Wald ratio	1	0.0166667	0.0513333	0.745427	0.989237	G	A	G	A	-0.15	-0.0025			FALSE	FALSE	FALSE	BMI	0.7431	0.0077	outcome	TRUE	reported	1.20226e-73	0.00826282	exposure	TRUE	reported	2	TRUE	39618
rs6470800	BMI	FA49B	Ferkingstad	Wald ratio	1	-0.048	0.15	0.748968	0.989378	G	T	G	T	0.05	-0.0024			FALSE	FALSE	FALSE	BMI	0.7514	0.0075	outcome	TRUE	reported	6.60693e-10	0.00809687	exposure	TRUE	reported	2	TRUE	39724
rs204074	BMI	41	Ferkingstad	Wald ratio	1	-0.038	0.141	0.787542	0.989691	C	T	C	T	-0.1	0.0038			FALSE	FALSE	FALSE	BMI	0.7851	0.0141	outcome	TRUE	reported	5.62341e-15	0.0128006	exposure	TRUE	reported	2	TRUE	38160
rs4316067	BMI	5NT3	Ferkingstad	Wald ratio	1	0.02375	0.1075	0.825147	0.989691	G	A	G	A	-0.08	-0.0019			FALSE	FALSE	FALSE	BMI	0.8211	0.0086	outcome	TRUE	reported	9.77237e-22	0.00835136	exposure	TRUE	reported	2	TRUE	38160
rs114464628	BMI	ABLM3	Ferkingstad	Wald ratio	1	-0.0211111	0.0818519	0.79647	0.989691	A	G	A	G	-0.27	0.0057			FALSE	FALSE	FALSE	BMI	0.7964	0.0221	outcome	TRUE	reported	8.12831e-46	0.0190029	exposure	TRUE	reported	2	TRUE	39618
rs7946718	BMI	ACAM	Ferkingstad	Wald ratio	1	-0.00714286	0.04	0.858274	0.989691	A	G	A	G	-0.21	0.0015			FALSE	FALSE	FALSE	BMI	0.8624	0.0084	outcome	TRUE	reported	3.0903e-142	0.00827032	exposure	TRUE	reported	2	TRUE	37609
rs12059975	BMI	AGT	Niu	Wald ratio	1	0.0108676	0.0351769	0.757365	0.989691	G	A	G	A	0.349662	0.0038			FALSE	FALSE	FALSE	BMI	0.759	0.0123	outcome	TRUE	reported	2.56945e-11	0.0521159	exposure	TRUE	reported	2	TRUE	39618
rs4745216	BMI	ANXA1	Suhre	Wald ratio	1	0.00737387	0.0271669	0.786061	0.989691	C	A	C	A	0.773	0.0057	0.04		FALSE	FALSE	FALSE	BMI	0.7849	0.021	outcome	TRUE	reported	5.2e-11	0.116	exposure	TRUE	reported	2	TRUE	39618
rs113345881	BMI	APOC1	Niu	Inverse variance weighted	2	0.00909599	0.0340183	0.789173	0.989691	A	G	A	G	0.300793	-0.004			FALSE	FALSE	FALSE	BMI	0.8208	0.0177	outcome	TRUE	reported	1.54504e-08	0.0529468	exposure	TRUE	reported	2	TRUE	33052.9
rs1552323	BMI	ATRN	Niu	Inverse variance weighted	2	-0.00415683	0.0238901	0.861867	0.989691	G	A	G	A	0.283672	0.0013			FALSE	FALSE	FALSE	BMI	0.9058	0.0109	outcome	TRUE	reported	2.33553e-09	0.0472677	exposure	TRUE	reported	2	TRUE	39725
rs3753436	BMI	BY55	Ferkingstad	Wald ratio	1	0.0138462	0.0623077	0.824141	0.989691	C	T	C	T	-0.13	-0.0018			FALSE	FALSE	FALSE	BMI	0.8265	0.0081	outcome	TRUE	reported	1.09648e-61	0.00784419	exposure	TRUE	reported	2	TRUE	38160
rs2303147	BMI	CAH11	Ferkingstad	Wald ratio	1	0.0155556	0.0605556	0.797271	0.989691	T	C	T	C	0.18	0.0028			FALSE	FALSE	FALSE	BMI	0.8007	0.0109	outcome	TRUE	reported	7.94328e-65	0.010587	exposure	TRUE	reported	2	TRUE	38265
rs17692864	BMI	CCL4	Folkersen	Wald ratio	2	0.00686531	0.0258656	0.790684	0.989691	T	C	T	C	0.24	-0.0062			FALSE	FALSE	FALSE	BMI	0.7911	0.0235	outcome	TRUE	reported	1.8e-15	0.03	exposure	TRUE	reported	2	TRUE	38160
rs3213636	BMI	CCL4L1	Suhre	Wald ratio	1	0.00374449	0.0295154	0.899047	0.989691	C	A	C	A	-0.454	-0.0017	0.19		FALSE	FALSE	FALSE	BMI	0.9005	0.0134	outcome	TRUE	reported	6.1e-15	0.057	exposure	TRUE	reported	2	TRUE	31286
rs4151669	BMI	CFB	Suhre	Wald ratio	1	0.00418803	0.015812	0.791114	0.989691	G	A	G	A	-1.17	-0.0049	0.04		FALSE	FALSE	FALSE	BMI	0.7901	0.0185	outcome	TRUE	reported	6.3e-28	0.104	exposure	TRUE	reported	2	TRUE	37851
rs753307	BMI	CGA CGB	Suhre	Wald ratio	1	0.00546875	0.0324219	0.866053	0.989691	T	C	T	C	0.256	0.0014	0.48		FALSE	FALSE	FALSE	BMI	0.8696	0.0083	outcome	TRUE	reported	9.4e-15	0.033	exposure	TRUE	reported	2	TRUE	34580
rs3122012	BMI	CRP	Niu	Wald ratio	1	-0.00976725	0.0320366	0.760459	0.989691	T	C	T	C	0.255957	-0.0025			FALSE	FALSE	FALSE	BMI	0.7598	0.0082	outcome	TRUE	reported	2.92794e-13	0.0348246	exposure	TRUE	reported	2	TRUE	38160
rs11579145	BMI	CSF-1	Folkersen	Wald ratio	1	-0.00555556	0.0416667	0.89393	0.989691	A	G	A	G	-0.18	0.001			FALSE	FALSE	FALSE	BMI	0.8991	0.0075	outcome	TRUE	reported	7.3e-56	0.011	exposure	TRUE	reported	2	TRUE	39724
rs6138152	BMI	CST5	Suhre	Wald ratio	1	0.00278552	0.0140669	0.84303	0.989691	A	G	A	G	0.718	0.002	0.2		FALSE	FALSE	FALSE	BMI	0.8427	0.0101	outcome	TRUE	reported	1.8e-42	0.05	exposure	TRUE	reported	2	TRUE	38160
rs41271951	BMI	CTSS	Suhre	Wald ratio	1	-0.00476684	0.0157513	0.762171	0.989691	A	G	A	G	-0.965	0.0046	0.09		FALSE	FALSE	FALSE	BMI	0.7629	0.0152	outcome	TRUE	reported	4.1e-40	0.07	exposure	TRUE	reported	2	TRUE	37506.1
rs35186877	BMI	CXCL16	Folkersen	Wald ratio	2	-0.013665	0.0754253	0.856232	0.989691	A	G	A	G	-0.17	0.0117			FALSE	FALSE	FALSE	BMI	0.2695	0.0106	outcome	TRUE	reported	6.4e-42	0.012	exposure	TRUE	reported	2	TRUE	38160
rs2291671	BMI	Carboxypeptidase B1	Ferkingstad	Wald ratio	1	-0.0075	0.0379167	0.8432	0.989691	A	G	A	G	0.24	-0.0018			FALSE	FALSE	FALSE	BMI	0.8382	0.0091	outcome	TRUE	reported	1.14815e-132	0.00979182	exposure	TRUE	reported	2	TRUE	39618.1
rs17806420	BMI	Cytochrome b5	Ferkingstad	Wald ratio	1	0.031	0.098	0.751755	0.989691	T	C	T	C	-0.1	-0.0031			FALSE	FALSE	FALSE	BMI	0.7515	0.0098	outcome	TRUE	reported	7.58578e-24	0.00993162	exposure	TRUE	reported	2	TRUE	39617.9
rs494189	BMI	DPT	Suhre	Wald ratio	1	0.00366197	0.024507	0.881218	0.989691	G	A	G	A	-0.355	-0.0013	0.25		FALSE	FALSE	FALSE	BMI	0.8809	0.0087	outcome	TRUE	reported	1.1e-14	0.045	exposure	TRUE	reported	2	TRUE	38160
rs7225351	BMI	DYL2	Ferkingstad	Wald ratio	1	-0.02	0.131667	0.879267	0.989691	G	A	G	A	-0.06	0.0012			FALSE	FALSE	FALSE	BMI	0.8828	0.0079	outcome	TRUE	reported	1.1749e-10	0.0093131	exposure	TRUE	reported	2	TRUE	39724
rs2229259	BMI	ECH1	Ferkingstad	Wald ratio	1	-0.00933333	0.0302222	0.757456	0.989691	T	C	T	C	0.45	-0.0042			FALSE	FALSE	FALSE	BMI	0.7556	0.0136	outcome	TRUE	reported	1e-200	0.0138607	exposure	TRUE	reported	2	TRUE	37664.1
rs7260110	BMI	EMR2	Suhre	Wald ratio	1	0.00606061	0.0323232	0.851269	0.989691	A	G	A	G	0.297	0.0018	0.36		FALSE	FALSE	FALSE	BMI	0.8531	0.0096	outcome	TRUE	reported	5.2e-11	0.045	exposure	TRUE	reported	2	TRUE	37235
rs352045	BMI	ENA-78	Ferkingstad	Wald ratio	1	0.008	0.062	0.897332	0.989691	T	G	T	G	0.2	0.0016			FALSE	FALSE	FALSE	BMI	0.8974	0.0124	outcome	TRUE	reported	2.75423e-73	0.0110448	exposure	TRUE	reported	2	TRUE	37235
rs17094448	BMI	ENTPD5	Suhre	Wald ratio	1	-0.00238984	0.0116505	0.837472	0.989691	A	G	A	G	-1.339	0.0032	0.07		FALSE	FALSE	FALSE	BMI	0.8354	0.0156	outcome	TRUE	reported	1.2e-60	0.076	exposure	TRUE	reported	2	TRUE	39618
rs947409	BMI	ESD	Suhre	Wald ratio	1	0.00377003	0.0121583	0.756502	0.989691	A	G	A	G	-1.061	-0.004	0.1		FALSE	FALSE	FALSE	BMI	0.7556	0.0129	outcome	TRUE	reported	2.2e-52	0.066	exposure	TRUE	reported	2	TRUE	39243.9
rs10858300	BMI	FCN1	Suhre	Wald ratio	1	-0.00586797	0.0202934	0.772462	0.989691	C	T	C	T	0.409	-0.0024	0.25		FALSE	FALSE	FALSE	BMI	0.7761	0.0083	outcome	TRUE	reported	6.2e-17	0.048	exposure	TRUE	reported	2	TRUE	39724
rs2989736	BMI	FCN2	Suhre	Wald ratio	1	0.00308642	0.0234568	0.895317	0.989691	G	A	G	A	0.324	0.001	0.44		FALSE	FALSE	FALSE	BMI	0.8911	0.0076	outcome	TRUE	reported	1.3e-13	0.043	exposure	TRUE	reported	2	TRUE	39173
rs2134279	BMI	FGL1	Niu	Inverse variance weighted	2	-0.00409202	0.0181195	0.82133	0.989691	G	C	G	C	0.225575	0.0043			FALSE	TRUE	TRUE	BMI	0.6359	0.009	outcome	TRUE	reported	4.21549e-09	0.0382138	exposure	TRUE	reported	2	FALSE	39617.9
rs12248841	BMI	GLRX3	Ferkingstad	Wald ratio	1	-0.02125	0.0975	0.827469	0.989691	C	T	C	T	-0.08	0.0017			FALSE	FALSE	FALSE	BMI	0.8242	0.0078	outcome	TRUE	reported	1.31826e-21	0.00837844	exposure	TRUE	reported	2	TRUE	38159.9
rs3743846	BMI	HERV1	Ferkingstad	Wald ratio	1	-0.0314286	0.141429	0.824141	0.989691	G	A	G	A	-0.07	0.0022			FALSE	FALSE	FALSE	BMI	0.8218	0.0099	outcome	TRUE	reported	4.46684e-11	0.0106259	exposure	TRUE	reported	2	TRUE	38160
rs11085896	BMI	HSP 40	Ferkingstad	Wald ratio	1	0.026	0.16	0.870912	0.989691	A	C	A	C	0.05	0.0013			FALSE	FALSE	FALSE	BMI	0.8725	0.008	outcome	TRUE	reported	1.86209e-10	0.00784645	exposure	TRUE	reported	2	TRUE	38160
rs600324	BMI	IGF2R	Suhre	Wald ratio	1	-0.00152749	0.0118126	0.897112	0.989691	C	T	C	T	-0.982	0.0015	0.1		FALSE	FALSE	FALSE	BMI	0.8972	0.0116	outcome	TRUE	reported	7.1e-48	0.064	exposure	TRUE	reported	2	TRUE	38799
rs2412776	BMI	IGFBP7	Suhre	Wald ratio	1	-0.00293454	0.021219	0.890005	0.989691	A	G	A	G	0.443	-0.0013	0.19		FALSE	FALSE	FALSE	BMI	0.8942	0.0094	outcome	TRUE	reported	5.5e-17	0.052	exposure	TRUE	reported	2	TRUE	38160
rs7655660	BMI	IL-8	Folkersen	Wald ratio	1	0.0163158	0.0952632	0.864011	0.989691	A	G	A	G	-0.19	-0.0031			FALSE	FALSE	FALSE	BMI	0.8656	0.0181	outcome	TRUE	reported	2.7e-15	0.024	exposure	TRUE	reported	2	TRUE	36393.1
rs1463657	BMI	IL17RD	Suhre	Wald ratio	1	0.00307942	0.0134522	0.818934	0.989691	A	C	A	C	0.617	0.0019	0.33		FALSE	FALSE	FALSE	BMI	0.8198	0.0083	outcome	TRUE	reported	1.4e-42	0.043	exposure	TRUE	reported	2	TRUE	39618.1
rs12712135	BMI	IL1RL1	Suhre	Wald ratio	1	-0.00292398	0.0109649	0.789726	0.989691	G	A	G	A	0.684	-0.002	0.46		FALSE	FALSE	FALSE	BMI	0.7948	0.0075	outcome	TRUE	reported	4.4e-76	0.034	exposure	TRUE	reported	2	TRUE	39618
rs2255336	BMI	KLRK1	Suhre	Wald ratio	1	-0.00676692	0.0245614	0.782924	0.989691	C	T	C	T	0.399	-0.0027	0.22		FALSE	FALSE	FALSE	BMI	0.7806	0.0098	outcome	TRUE	reported	1.3e-13	0.053	exposure	TRUE	reported	2	TRUE	36155
rs9013	BMI	KYNU	Suhre	Wald ratio	1	-0.00133971	0.00956938	0.88866	0.989691	A	G	A	G	-1.045	0.0014	0.16		FALSE	FALSE	FALSE	BMI	0.8929	0.01	outcome	TRUE	reported	1e-81	0.05	exposure	TRUE	reported	2	TRUE	39567
rs12537573	BMI	LEP	Folkersen	Wald ratio	1	-0.0315789	0.105263	0.764177	0.989691	A	G	A	G	-0.076	0.0024			FALSE	FALSE	FALSE	BMI	0.7607	0.008	outcome	TRUE	reported	3.1e-09	0.013	exposure	TRUE	reported	2	TRUE	38160
rs103294	BMI	LILRB2	Suhre	Wald ratio	1	0.00275716	0.00986214	0.779808	0.989691	C	T	C	T	-0.943	-0.0026	0.19		FALSE	FALSE	FALSE	BMI	0.78	0.0093	outcome	TRUE	reported	1.7e-73	0.048	exposure	TRUE	reported	2	TRUE	37317
rs4265433	BMI	LZIC	Ferkingstad	Wald ratio	1	-0.0288235	0.201765	0.886403	0.989691	A	G	A	G	-0.17	0.0049			FALSE	FALSE	FALSE	BMI	0.886	0.0343	outcome	TRUE	reported	2.63027e-10	0.0269024	exposure	TRUE	reported	2	TRUE	34003
rs6669284	BMI	MAPKAPK2	Suhre	Wald ratio	1	0.00368098	0.0248466	0.882226	0.989691	G	A	G	A	0.326	0.0012	0.35		FALSE	FALSE	FALSE	BMI	0.8775	0.0081	outcome	TRUE	reported	3.9e-13	0.044	exposure	TRUE	reported	2	TRUE	39618
rs7676259	BMI	METAP1	Ferkingstad	Wald ratio	1	0.0166667	0.128333	0.896669	0.989691	A	G	A	G	0.06	0.001			FALSE	FALSE	FALSE	BMI	0.9009	0.0077	outcome	TRUE	reported	4.16869e-15	0.00764356	exposure	TRUE	reported	2	TRUE	39618.1
rs17860955	BMI	MMP-10	Folkersen	Wald ratio	2	0.00451861	0.0267644	0.865931	0.989691	T	C	T	C	1.1	-0.0064			FALSE	FALSE	FALSE	BMI	0.8501	0.0341	outcome	TRUE	reported	6.4e-143	0.044	exposure	TRUE	reported	2	TRUE	30502
rs11031140	BMI	MPPD2	Ferkingstad	Wald ratio	1	-0.01	0.065	0.877731	0.989691	A	G	A	G	-0.16	0.0016			FALSE	FALSE	FALSE	BMI	0.878	0.0104	outcome	TRUE	reported	2.5704e-53	0.0104094	exposure	TRUE	reported	2	TRUE	38160.1
rs9858542	BMI	MST1	Suhre	Wald ratio	1	0.00123172	0.00646651	0.848936	0.989691	G	A	G	A	-1.299	-0.0016	0.28		FALSE	FALSE	FALSE	BMI	0.8522	0.0084	outcome	TRUE	reported	1e-200	0.029	exposure	TRUE	reported	2	TRUE	37069
rs10179340	BMI	MTND	Ferkingstad	Wald ratio	1	0.0245455	0.0954545	0.797068	0.989691	A	G	A	G	0.11	0.0027			FALSE	FALSE	FALSE	BMI	0.7956	0.0105	outcome	TRUE	reported	7.76247e-22	0.0114547	exposure	TRUE	reported	2	TRUE	37851.1
rs4237446	BMI	NMT2	Ferkingstad	Wald ratio	1	-0.02125	0.11625	0.854958	0.989691	C	T	C	T	0.08	-0.0017			FALSE	FALSE	FALSE	BMI	0.8537	0.0093	outcome	TRUE	reported	1.1749e-13	0.0107823	exposure	TRUE	reported	2	TRUE	39724
rs2399786	BMI	NUDT5	Ferkingstad	Wald ratio	1	0.0271429	0.111429	0.807549	0.989691	C	T	C	T	-0.07	-0.0019			FALSE	FALSE	FALSE	BMI	0.8095	0.0078	outcome	TRUE	reported	7.07946e-19	0.00788853	exposure	TRUE	reported	2	TRUE	36153
rs4834770	BMI	PDE5A	Suhre	Wald ratio	1	0.00382166	0.0242038	0.87454	0.989691	G	A	G	A	-0.314	-0.0012	0.43		FALSE	FALSE	FALSE	BMI	0.8697	0.0076	outcome	TRUE	reported	3.6e-12	0.045	exposure	TRUE	reported	2	TRUE	39618
rs61765292	BMI	PGM1	Ferkingstad	Wald ratio	1	0.0183333	0.0766667	0.811004	0.989691	G	A	G	A	0.12	0.0022			FALSE	FALSE	FALSE	BMI	0.8116	0.0092	outcome	TRUE	reported	4.36516e-29	0.0107201	exposure	TRUE	reported	2	TRUE	39618
rs9919823	BMI	PKP2	Ferkingstad	Wald ratio	1	0.0233333	0.08375	0.780546	0.989691	C	T	C	T	0.24	0.0056			FALSE	FALSE	FALSE	BMI	0.7811	0.0201	outcome	TRUE	reported	2.5704e-36	0.0190711	exposure	TRUE	reported	2	TRUE	39618
rs8396	BMI	PPID	Suhre	Wald ratio	1	0.00359281	0.0175649	0.837927	0.989691	T	C	T	C	0.501	0.0018	0.29		FALSE	FALSE	FALSE	BMI	0.8418	0.0088	outcome	TRUE	reported	3.4e-26	0.046	exposure	TRUE	reported	2	TRUE	35505
rs9787249	BMI	PPIE	Suhre	Wald ratio	1	-0.00304348	0.0171739	0.859339	0.989691	G	A	G	A	-0.46	0.0014	0.38		FALSE	FALSE	FALSE	BMI	0.8561	0.0079	outcome	TRUE	reported	8.9e-24	0.045	exposure	TRUE	reported	2	TRUE	39618
rs3742500	BMI	PSME1	Ferkingstad	Wald ratio	1	0.0366667	0.15	0.806887	0.989691	T	G	T	G	0.06	0.0022			FALSE	FALSE	FALSE	BMI	0.8029	0.009	outcome	TRUE	reported	1.38038e-10	0.00934865	exposure	TRUE	reported	2	TRUE	38160
rs10758322	BMI	PSMP	Ferkingstad	Wald ratio	1	0.025	0.126667	0.843539	0.989691	T	C	T	C	0.06	0.0015			FALSE	FALSE	FALSE	BMI	0.8403	0.0076	outcome	TRUE	reported	2.63027e-13	0.00820559	exposure	TRUE	reported	2	TRUE	39721
rs55763631	BMI	PTPRS	Ferkingstad	Wald ratio	1	-0.0315	0.1085	0.771569	0.989691	A	C	A	C	0.2	-0.0063			FALSE	FALSE	FALSE	BMI	0.7704	0.0217	outcome	TRUE	reported	3.89045e-33	0.0166771	exposure	TRUE	reported	2	TRUE	36393
rs12371	BMI	QSOX1	Niu	Inverse variance weighted	2	0.0107845	0.0469344	0.818264	0.989691	A	G	A	G	-0.412134	0.012			FALSE	FALSE	FALSE	BMI	0.4151	0.0147	outcome	TRUE	reported	6.05366e-13	0.0568506	exposure	TRUE	reported	2	TRUE	37131.9
rs2422441	BMI	RAB1A	Ferkingstad	Wald ratio	1	0.02	0.136667	0.883652	0.989691	A	G	A	G	-0.06	-0.0012			FALSE	FALSE	FALSE	BMI	0.8885	0.0082	outcome	TRUE	reported	9.33254e-11	0.009263	exposure	TRUE	reported	2	TRUE	39725
rs9640161	BMI	RARRES2	Suhre	Wald ratio	1	0.00317003	0.0233429	0.891977	0.989691	C	A	C	A	0.347	0.0011	0.37		FALSE	FALSE	FALSE	BMI	0.8889	0.0081	outcome	TRUE	reported	3e-16	0.042	exposure	TRUE	reported	2	TRUE	38043
rs4951315	BMI	REN	Folkersen	Wald ratio	2	-0.0127035	0.058717	0.828713	0.989691	A	C	A	C	-0.088	-0.0026			FALSE	FALSE	FALSE	BMI	0.7575	0.0084	outcome	TRUE	reported	3.8e-12	0.013	exposure	TRUE	reported	2	TRUE	38160
rs11031142	BMI	RRM1	Ferkingstad	Wald ratio	1	0.035	0.126667	0.782306	0.989691	C	T	C	T	0.06	0.0021			FALSE	FALSE	FALSE	BMI	0.7852	0.0076	outcome	TRUE	reported	1.20226e-11	0.00884964	exposure	TRUE	reported	2	TRUE	39618
rs9373885	BMI	RT4I1	Ferkingstad	Wald ratio	1	0.03	0.131429	0.819443	0.989691	T	C	T	C	-0.07	-0.0021			FALSE	FALSE	FALSE	BMI	0.8182	0.0092	outcome	TRUE	reported	4.36516e-16	0.00861223	exposure	TRUE	reported	2	TRUE	38160
rs17284969	BMI	SEMA3E	Suhre	Wald ratio	1	0.00177239	0.0109142	0.870996	0.989691	G	A	G	A	-1.072	-0.0019	0.12		FALSE	FALSE	FALSE	BMI	0.8691	0.0117	outcome	TRUE	reported	2.4e-65	0.058	exposure	TRUE	reported	2	TRUE	39618
rs2749534	BMI	SERPINA1	Suhre	Wald ratio	1	-0.00351288	0.0203747	0.863112	0.989691	A	G	A	G	0.427	-0.0015	0.2		FALSE	FALSE	FALSE	BMI	0.8616	0.0087	outcome	TRUE	reported	5.6e-15	0.054	exposure	TRUE	reported	2	TRUE	39723
rs56301921	BMI	SERPINA10	Niu	Wald ratio	1	0.0059135	0.0413945	0.886403	0.989691	G	A	G	A	-0.422762	-0.0025			FALSE	FALSE	FALSE	BMI	0.8844	0.0175	outcome	TRUE	reported	1.04162e-10	0.0650687	exposure	TRUE	reported	2	TRUE	39618
rs2691273	BMI	SIGLEC9	Suhre	Wald ratio	1	0.0013089	0.00994764	0.895317	0.989691	A	G	A	G	0.764	0.001	0.46		FALSE	FALSE	FALSE	BMI	0.8911	0.0076	outcome	TRUE	reported	3.1e-73	0.039	exposure	TRUE	reported	2	TRUE	39724
rs6043409	BMI	SIRPG	Ferkingstad	Wald ratio	1	0.01	0.0546667	0.854855	0.989691	A	G	A	G	-0.15	-0.0015			FALSE	FALSE	FALSE	BMI	0.854	0.0082	outcome	TRUE	reported	8.51138e-70	0.00849373	exposure	TRUE	reported	2	TRUE	38668
rs2210969	BMI	SORC1	Ferkingstad	Wald ratio	1	-0.0283333	0.128333	0.825264	0.989691	G	A	G	A	0.06	-0.0017			FALSE	FALSE	FALSE	BMI	0.8278	0.0077	outcome	TRUE	reported	5.01187e-15	0.00766615	exposure	TRUE	reported	2	TRUE	37612
rs4693167	BMI	SPARCL1	Suhre	Wald ratio	1	0.00235294	0.0116176	0.839501	0.989691	T	C	T	C	0.68	0.0016	0.37		FALSE	FALSE	FALSE	BMI	0.8343	0.0079	outcome	TRUE	reported	2.6e-53	0.042	exposure	TRUE	reported	2	TRUE	39618
rs3806701	BMI	TDGF1	Suhre	Wald ratio	1	0.00180832	0.0079566	0.820212	0.989691	G	A	G	A	1.106	0.002	0.27		FALSE	FALSE	FALSE	BMI	0.818	0.0088	outcome	TRUE	reported	3.8e-145	0.036	exposure	TRUE	reported	2	TRUE	37210.1
rs35030851	BMI	TEK	Suhre	Wald ratio	1	0.00335498	0.0205628	0.870394	0.989691	G	T	G	T	0.924	0.0031	0.05		FALSE	FALSE	FALSE	BMI	0.8686	0.019	outcome	TRUE	reported	4.1e-21	0.096	exposure	TRUE	reported	2	TRUE	38404
rs35030851	BMI	TIE2	Folkersen	Wald ratio	1	-0.00378049	0.0231707	0.870394	0.989691	T	G	T	G	0.82	-0.0031			FALSE	FALSE	FALSE	BMI	0.8686	0.019	outcome	TRUE	reported	1e-200	0.026	exposure	TRUE	reported	2	TRUE	38404
rs289828	BMI	TNFAIP6	Suhre	Wald ratio	1	-0.00253165	0.0194937	0.896669	0.989691	T	C	T	C	0.395	-0.001	0.43		FALSE	FALSE	FALSE	BMI	0.8921	0.0077	outcome	TRUE	reported	2.1e-21	0.041	exposure	TRUE	reported	2	TRUE	39618
rs2302524	BMI	U-PAR	Folkersen	Wald ratio	1	0.0207143	0.0785714	0.79206	0.989691	T	C	T	C	0.14	0.0029			FALSE	FALSE	FALSE	BMI	0.7897	0.011	outcome	TRUE	reported	6e-28	0.013	exposure	TRUE	reported	2	TRUE	36155
rs936228	BMI	ULK3	Ferkingstad	Wald ratio	1	0.0177778	0.0944444	0.850692	0.989691	T	C	T	C	0.09	0.0016			FALSE	FALSE	FALSE	BMI	0.8502	0.0085	outcome	TRUE	reported	5.62341e-22	0.00933979	exposure	TRUE	reported	2	TRUE	38693
rs117268623	BMI	hK11	Folkersen	Wald ratio	1	0.00585714	0.0205714	0.775857	0.989691	T	C	T	C	-1.4	-0.0082			FALSE	FALSE	FALSE	BMI	0.7756	0.0288	outcome	TRUE	reported	1e-200	0.044	exposure	TRUE	reported	2	TRUE	34716.1
rs3829126	BMI	sPLA(2)-XIII	Ferkingstad	Wald ratio	1	0.026	0.0913333	0.775896	0.989691	T	G	T	G	-0.15	-0.0039			FALSE	FALSE	FALSE	BMI	0.7744	0.0137	outcome	TRUE	reported	1.28825e-27	0.0137743	exposure	TRUE	reported	2	TRUE	38267
rs922182	BMI	DAPK2	Suhre	Wald ratio	1	-0.00238727	0.0201592	0.905734	0.995006	C	T	C	T	0.377	-0.0009	0.45		FALSE	FALSE	FALSE	BMI	0.9082	0.0076	outcome	TRUE	reported	3.1e-18	0.042	exposure	TRUE	reported	2	TRUE	38266
rs2004318	BMI	LILRB1	Suhre	Wald ratio	1	-0.00111794	0.00994969	0.910538	0.996192	C	T	C	T	-1.789	0.002	0.05		FALSE	FALSE	FALSE	BMI	0.9087	0.0178	outcome	TRUE	reported	1.8e-80	0.086	exposure	TRUE	reported	2	TRUE	39618
rs7241196	BMI	SNAG	Ferkingstad	Wald ratio	1	-0.0128571	0.112857	0.909298	0.996192	C	T	C	T	-0.07	0.0009			FALSE	FALSE	FALSE	BMI	0.904	0.0079	outcome	TRUE	reported	6.0256e-19	0.00787263	exposure	TRUE	reported	2	TRUE	37210.1
rs6662572	BMI	AKR1A1	Suhre	Wald ratio	1	0.00245399	0.0266871	0.926735	0.996205	A	G	A	G	-0.326	-0.0008	0.26		FALSE	FALSE	FALSE	BMI	0.9271	0.0087	outcome	TRUE	reported	5.8e-11	0.049	exposure	TRUE	reported	2	TRUE	39618
rs2292959	BMI	CTSD	Folkersen	Wald ratio	2	0.0037119	0.0400088	0.926081	0.996205	A	C	A	C	0.15	0.0138			FALSE	FALSE	FALSE	BMI	0.1989	0.0107	outcome	TRUE	reported	7.8e-35	0.012	exposure	TRUE	reported	2	TRUE	39618
rs12151621	BMI	GNLY	Suhre	Wald ratio	1	-0.000886918	0.00997783	0.92917	0.996205	C	A	C	A	0.902	-0.0008	0.21		FALSE	FALSE	FALSE	BMI	0.9313	0.009	outcome	TRUE	reported	5.8e-76	0.045	exposure	TRUE	reported	2	TRUE	39618
rs62311449	BMI	HCDH	Ferkingstad	Wald ratio	1	0.0107143	0.115714	0.926227	0.996205	A	G	A	G	-0.14	-0.0015			FALSE	FALSE	FALSE	BMI	0.9258	0.0162	outcome	TRUE	reported	5.88844e-18	0.0162137	exposure	TRUE	reported	2	TRUE	39618
rs5745687	BMI	HGF	Folkersen	Wald ratio	1	0.008	0.0805	0.920837	0.996205	T	C	T	C	-0.2	-0.0016			FALSE	FALSE	FALSE	BMI	0.9188	0.0161	outcome	TRUE	reported	3.1e-18	0.023	exposure	TRUE	reported	2	TRUE	37613
rs4674100	BMI	IGFBP-2	Ferkingstad	Wald ratio	1	-0.015	0.163333	0.926828	0.996205	A	G	A	G	-0.06	0.0009			FALSE	FALSE	FALSE	BMI	0.9255	0.0098	outcome	TRUE	reported	1.69824e-09	0.00995963	exposure	TRUE	reported	2	TRUE	38159.9
rs1024948	BMI	IL1RAP	Suhre	Wald ratio	1	-0.000813609	0.00798817	0.918874	0.996205	T	C	T	C	1.352	-0.0011	0.13		FALSE	FALSE	FALSE	BMI	0.9194	0.0108	outcome	TRUE	reported	2.5e-165	0.04	exposure	TRUE	reported	2	TRUE	39618
rs3743392	BMI	MFGE8	Suhre	Wald ratio	1	0.00253968	0.0260317	0.922281	0.996205	A	G	A	G	-0.315	-0.0008	0.32		FALSE	FALSE	FALSE	BMI	0.9183	0.0082	outcome	TRUE	reported	4.8e-12	0.045	exposure	TRUE	reported	2	TRUE	39618
rs6916921	BMI	NCR3	Suhre	Wald ratio	1	-0.00242326	0.0234249	0.917607	0.996205	C	T	C	T	-0.619	0.0015	0.13		FALSE	FALSE	FALSE	BMI	0.9167	0.0145	outcome	TRUE	reported	2.2e-23	0.061	exposure	TRUE	reported	2	TRUE	35297
rs11589759	BMI	TF	Folkersen	Wald ratio	1	0.00388889	0.0433333	0.928491	0.996205	T	C	T	C	-0.18	-0.0007			FALSE	FALSE	FALSE	BMI	0.9289	0.0078	outcome	TRUE	reported	6.9e-62	0.011	exposure	TRUE	reported	2	TRUE	39618
rs41265665	BMI	AFM	Suhre	Wald ratio	1	-0.00197216	0.0325986	0.951759	1	G	A	G	A	-0.862	0.0017	0.03		FALSE	FALSE	FALSE	BMI	0.9526	0.0281	outcome	TRUE	reported	3e-12	0.122	exposure	TRUE	reported	2	TRUE	34081
rs7221769	BMI	CCL15	Suhre	Wald ratio	1	0.000526316	0.0107237	0.960856	1	T	C	T	C	1.52	0.0008	0.07		FALSE	FALSE	FALSE	BMI	0.9629	0.0163	outcome	TRUE	reported	3.6e-93	0.067	exposure	TRUE	reported	2	TRUE	38160
rs2230641	BMI	Cyclin H	Ferkingstad	Wald ratio	1	-0.002	0.097	0.98355	1	G	A	G	A	-0.1	0.0002			FALSE	FALSE	FALSE	BMI	0.9861	0.0097	outcome	TRUE	reported	1.38038e-22	0.0102256	exposure	TRUE	reported	2	TRUE	35070
rs4911994	BMI	DAN	Ferkingstad	Wald ratio	1	0	0.156	1	1	C	A	C	A	0.05	0			FALSE	FALSE	FALSE	BMI	0.9988	0.0078	outcome	TRUE	reported	1.41254e-10	0.0077948	exposure	TRUE	reported	2	TRUE	39618.1
rs4865884	BMI	ESM-1	Folkersen	Wald ratio	2	0.00127777	0.111816	0.990882	1	A	G	A	G	0.13	0.0129			FALSE	FALSE	FALSE	BMI	0.1408	0.0088	outcome	TRUE	reported	2.8e-11	0.02	exposure	TRUE	reported	2	TRUE	39618.1
rs67333363	BMI	Ephrin-A3	Ferkingstad	Wald ratio	1	-0.00555556	0.193333	0.977075	1	G	A	G	A	-0.09	0.0005			FALSE	FALSE	FALSE	BMI	0.9777	0.0174	outcome	TRUE	reported	2.51189e-10	0.0142264	exposure	TRUE	reported	2	TRUE	39617.9
rs776905	BMI	F7	Suhre	Wald ratio	1	-0.000362319	0.0126812	0.977206	1	A	C	A	C	-1.104	0.0004	0.11		FALSE	FALSE	FALSE	BMI	0.9797	0.014	outcome	TRUE	reported	9.2e-65	0.06	exposure	TRUE	reported	2	TRUE	35419
rs10794501	BMI	FCN3	Niu	Wald ratio	1	-0.000417071	0.0193243	0.982781	1	A	T	A	T	0.255086	0.0105			FALSE	TRUE	TRUE	BMI	0.313	0.0104	outcome	TRUE	reported	9.32436e-12	0.0371889	exposure	TRUE	reported	2	FALSE	38160
rs1250258	BMI	FN1	Suhre	Wald ratio	1	0	0.0126582	1	1	T	C	T	C	-0.711	0	0.26		FALSE	FALSE	FALSE	BMI	0.9992	0.009	outcome	TRUE	reported	1.3e-49	0.045	exposure	TRUE	reported	2	TRUE	38160
rs1250258	BMI	FN1.3	Ferkingstad	Wald ratio	1	0	0.05625	1	1	C	T	C	T	-0.16	0			FALSE	FALSE	FALSE	BMI	0.9992	0.009	outcome	TRUE	reported	5.24807e-83	0.00828964	exposure	TRUE	reported	2	TRUE	38160
rs1250258	BMI	Fibronectin	Ferkingstad	Wald ratio	1	0	0.05	1	1	C	T	C	T	-0.18	0			FALSE	FALSE	FALSE	BMI	0.9992	0.009	outcome	TRUE	reported	2.13796e-102	0.00837783	exposure	TRUE	reported	2	TRUE	38160
rs2228243	BMI	HRG	Suhre	Wald ratio	1	0.00019861	0.0100298	0.984201	1	A	G	A	G	1.007	0.0002	0.21		FALSE	FALSE	FALSE	BMI	0.9835	0.0101	outcome	TRUE	reported	4.7e-94	0.044	exposure	TRUE	reported	2	TRUE	35028
rs4890114	BMI	IGFBP-4	Ferkingstad	Wald ratio	1	-0.00833333	0.14	0.952535	1	G	A	G	A	0.06	-0.0005			FALSE	FALSE	FALSE	BMI	0.9531	0.0084	outcome	TRUE	reported	5.49541e-12	0.00870555	exposure	TRUE	reported	2	TRUE	38160
rs7598172	BMI	IGFBP-5	Ferkingstad	Wald ratio	1	-0.002	0.15	0.989362	1	G	T	G	T	0.05	-0.0001			FALSE	FALSE	FALSE	BMI	0.992	0.0075	outcome	TRUE	reported	2.51189e-10	0.00790357	exposure	TRUE	reported	2	TRUE	39723
rs13411467	BMI	IGKV1-8	Niu	Wald ratio	1	0	0.031205	1	1	T	C	T	C	0.365326	0			FALSE	FALSE	FALSE	BMI	0.9995	0.0114	outcome	TRUE	reported	3.55408e-14	0.0478505	exposure	TRUE	reported	2	TRUE	38267
rs1135816	BMI	KLRB1	Ferkingstad	Wald ratio	1	-0.00130435	0.0347826	0.970086	1	G	A	G	A	-0.23	0.0003			FALSE	FALSE	FALSE	BMI	0.9683	0.008	outcome	TRUE	reported	5.37032e-177	0.0081084	exposure	TRUE	reported	2	TRUE	36556
rs540254	BMI	LY9	Suhre	Wald ratio	1	-0.00143885	0.0191847	0.940215	1	T	C	T	C	0.417	-0.0006	0.35		FALSE	FALSE	FALSE	BMI	0.9377	0.008	outcome	TRUE	reported	7.8e-20	0.045	exposure	TRUE	reported	2	TRUE	38160
rs3814526	BMI	Lipocalin 2	Ferkingstad	Wald ratio	1	-0.00466667	0.110667	0.966364	1	G	A	G	A	-0.15	0.0007			FALSE	FALSE	FALSE	BMI	0.9677	0.0166	outcome	TRUE	reported	4.89779e-13	0.0207523	exposure	TRUE	reported	2	TRUE	39724
rs4614414	BMI	MMP-3	Folkersen	Wald ratio	2	0.000611122	0.0156796	0.96891	1	T	C	T	C	-0.086	0.0091			FALSE	FALSE	FALSE	BMI	0.3513	0.0097	outcome	TRUE	reported	2.3e-10	0.014	exposure	TRUE	reported	2	TRUE	38160
rs11568819	BMI	MMP-7	Folkersen	Wald ratio	1	0.00107143	0.0296429	0.971167	1	A	G	A	G	0.56	0.0006			FALSE	FALSE	FALSE	BMI	0.9701	0.0166	outcome	TRUE	reported	9.5e-116	0.024	exposure	TRUE	reported	2	TRUE	38160
rs11568819	BMI	MMP7	Suhre	Wald ratio	1	-0.000898204	0.0248503	0.971167	1	G	A	G	A	0.668	-0.0006	0.07		FALSE	FALSE	FALSE	BMI	0.9701	0.0166	outcome	TRUE	reported	5.8e-14	0.088	exposure	TRUE	reported	2	TRUE	38160
rs4536117	BMI	MMRN2	Niu	Wald ratio	1	-0.000349431	0.0443778	0.993718	1	A	G	A	G	-0.286179	0.0001			FALSE	FALSE	FALSE	BMI	0.9965	0.0127	outcome	TRUE	reported	4.56631e-08	0.0521308	exposure	TRUE	reported	2	TRUE	39618.1
rs8176749	BMI	NOTCH1	Suhre	Wald ratio	1	0.000223214	0.0310268	0.99426	1	C	T	C	T	0.448	0.0001	0.09		FALSE	FALSE	FALSE	BMI	0.9942	0.0139	outcome	TRUE	reported	6e-10	0.072	exposure	TRUE	reported	2	TRUE	37612
rs3134095	BMI	OPG	Folkersen	Wald ratio	2	-0.00363151	0.077629	0.962688	1	T	C	T	C	0.13	-0.0008			FALSE	FALSE	FALSE	BMI	0.9656	0.0174	outcome	TRUE	reported	8.8e-14	0.018	exposure	TRUE	reported	2	TRUE	38775
rs665677	BMI	PATE4	Ferkingstad	Wald ratio	1	-0.00461538	0.0623077	0.940951	1	A	G	A	G	0.13	-0.0006			FALSE	FALSE	FALSE	BMI	0.9369	0.0081	outcome	TRUE	reported	1.38038e-44	0.00927999	exposure	TRUE	reported	2	TRUE	39722
rs16923189	BMI	PDCD1LG2	Suhre	Wald ratio	1	0	0.0158397	1	1	A	G	A	G	0.524	0	0.28		FALSE	FALSE	FALSE	BMI	0.996	0.0083	outcome	TRUE	reported	1.6e-26	0.048	exposure	TRUE	reported	2	TRUE	39724
rs175510	BMI	PlGF	Folkersen	Wald ratio	1	0	0.07	1	1	A	G	A	G	0.11	0			FALSE	FALSE	FALSE	BMI	0.9988	0.0077	outcome	TRUE	reported	1.3e-29	0.01	exposure	TRUE	reported	2	TRUE	38160.1
rs2233859	BMI	RNase 2	Ferkingstad	Wald ratio	1	-0.00357143	0.06	0.952535	1	A	C	A	C	0.14	-0.0005			FALSE	FALSE	FALSE	BMI	0.9559	0.0084	outcome	TRUE	reported	1.7378e-74	0.00766723	exposure	TRUE	reported	2	TRUE	37235
rs6136	BMI	SELP	Suhre	Wald ratio	1	-0.00130208	0.0177083	0.941385	1	T	G	T	G	-0.768	0.001	0.1		FALSE	FALSE	FALSE	BMI	0.9396	0.0136	outcome	TRUE	reported	1.1e-25	0.071	exposure	TRUE	reported	2	TRUE	34473
rs489286	BMI	SLAMF7	Suhre	Wald ratio	1	0	0.0117221	1	1	G	A	G	A	-0.691	0	0.35		FALSE	FALSE	FALSE	BMI	0.9962	0.0081	outcome	TRUE	reported	1.5e-57	0.04	exposure	TRUE	reported	2	TRUE	39618
rs28385609	BMI	SMPDL3A	Suhre	Wald ratio	1	0.00075188	0.0231203	0.974057	1	C	T	C	T	-0.532	-0.0004	0.14		FALSE	FALSE	FALSE	BMI	0.9749	0.0123	outcome	TRUE	reported	1.7e-17	0.061	exposure	TRUE	reported	2	TRUE	34280.9
rs8104011	BMI	Tropomyosin 4	Ferkingstad	Wald ratio	1	0.00583333	0.16	0.970917	1	A	G	A	G	-0.24	-0.0014			FALSE	FALSE	FALSE	BMI	0.9719	0.0384	outcome	TRUE	reported	5.01187e-17	0.0286177	exposure	TRUE	reported	2	TRUE	33891.1
rs6921438	BMI	VEGF-A	Folkersen	Wald ratio	1	0.000666667	0.0173333	0.96932	1	A	G	A	G	-0.45	-0.0003			FALSE	FALSE	FALSE	BMI	0.9684	0.0078	outcome	TRUE	reported	1e-200	0.012	exposure	TRUE	reported	2	TRUE	37235
rs7742200	BMI	VNN1	Niu	Inverse variance weighted	2	-0.000388928	0.0220423	0.985922	1	C	A	C	A	0.291563	0.0047			FALSE	FALSE	FALSE	BMI	0.5529	0.008	outcome	TRUE	reported	2.0205e-18	0.0329596	exposure	TRUE	reported	2	TRUE	38668
rs9240	BMI	ZADH2	Ferkingstad	Wald ratio	1	0.00333333	0.0866667	0.96932	1	C	T	C	T	-0.09	-0.0003			FALSE	FALSE	FALSE	BMI	0.9742	0.0078	outcome	TRUE	reported	1.20226e-31	0.00768905	exposure	TRUE	reported	2	TRUE	39618
rs34990628	BMI	nectin-4	Ferkingstad	Wald ratio	1	-0.01	0.1575	0.949375	1	T	C	T	C	-0.08	0.0008			FALSE	FALSE	FALSE	BMI	0.9482	0.0126	outcome	TRUE	reported	2.75423e-13	0.0109501	exposure	TRUE	reported	2	TRUE	38160

## Sheet: S3-Power-BMI
Table S3. MR power caclulation. Proteins with less than 80% power are highlighted.
Outcome	Exposure (protein)	SNP	Study	Sample Size	SD protein level	SD BMI	alpha	R2	MR Beta	POWER	F-stat
childhood BMI	ENG	rs651007	Suhre	39620	1	1	0.00013422	0.107349	-0.0716418	0.81	4765.63
childhood BMI	FABP4	rs77878271	Folkersen	39620	1	1	0.00013422	0.00253006	-0.331923	0.38	101.5
childhood BMI	Nectin-like protein 2	rs11215406	Ferkingstad	39620	1	1	0.00013422	0.00855158	-0.260667	0.88	342.74
Replication
childhood BMI	ENG	rs11794565	Sun UKB	39620	1	1	0.5	0.00208187	0.0208494	0.51	83.66
childhood BMI	ENG	rs651007	Emilsson	39620	1	1	0.5	0.129337	0.0904494	1	5886.54
adult BMI	Nectin-like protein 2	rs11215406	Ferkingstad	39620	1	1	0.5	0.136589	-0.08	1	6268.75

## Sheet: S4-Coloc
Table S4. Colocalization results for candidate proteins (ENG, FABP4, Nectin-like protein 2) with childhood BMI
Number.SNPs	PP.H0	PP.H1	PP.H2	PP.H3	PP.H4
Endoglin (ENG)
118	3.935060e-19	1.036587E-20	0.04132184	0.0001299657	0.9585482
Fatty Acid Binding Protein 4 (FABP4)
2613	4.221201e-09	9.312715e-10	0.1981635	0.04295949	0.758877
Nectin-like protein 2
2416	8.286706e-65	1.696834e-63	0.002541686	0.05109869	0.9463596

## Sheet: S5-PheWAS-BMI-ENG
Table S5. PheWAS search for GWAS associations of cis-pQTL of ENG (rs651007) with compex traits. Anthropometric traits are denoted in bold. Associations with bmi are highlighted in red.
Study ID	Trait	Trait Category	P-value	Beta	Odds Ratio	PMID	Author (Year)	N Cases	N Overall	Has sumstats
NEALE2_1428_3	Other type of spread/margarine | spread type	measurement	0.00347252	0.0169654	1.01711		UKB Neale v2	169698	360291	TRUE
NEALE2_20110_1	Heart disease | illnesses of mother	cardiovascular disease	0.00062264	0.025487	1.02581		UKB Neale v2	66343	332966	TRUE
NEALE2_20111_1	Heart disease | illnesses of siblings	cardiovascular disease	0.000308638	0.037817	1.03854		UKB Neale v2	28696	280784	TRUE
NEALE2_6150_4	High blood pressure | vascular/heart problems diagnosed by doctor	measurement	4.92382e-09	-0.0373485	0.96334		UKB Neale v2	97139	360420	TRUE
NEALE2_20107_100	None of the above (group 1) | illnesses of father	Uncategorised	0.00418181	-0.018451	0.981718		UKB Neale v2	116736	314797	TRUE
NEALE2_6150_100	None of the above | vascular/heart problems diagnosed by doctor	Uncategorised	3.51857e-06	0.0284899	1.0289		UKB Neale v2	106855	360420	TRUE
NEALE2_20003_1140884600	Metformin | treatment/medication code	Uncategorised	0.0013364	0.059738	1.06156		UKB Neale v2	8968	361141	TRUE
NEALE2_20003_1140868226	Aspirin | treatment/medication code	measurement	0.000223207	0.030617	1.03109		UKB Neale v2	48081	361141	TRUE
NEALE2_23122_raw	Arm predicted mass (right)	measurement	9.40757e-07	-0.00591553			UKB Neale v2		354726	TRUE
NEALE2_1448_1	White | bread type	measurement	0.00117531	0.0215719	1.02181		UKB Neale v2	91452	348424	TRUE
NEALE2_46_raw	Hand grip strength (left)	measurement	5.41047e-07	-0.110158			UKB Neale v2		359704	TRUE
NEALE2_30190_raw	Monocyte percentage	measurement	1.07763e-06	-0.0383129			UKB Neale v2		349861	TRUE
NEALE2_4120_raw	Heel broadband ultrasound attenuation (right)	measurement	8.22126e-09	-0.544735			UKB Neale v2		114609	TRUE
NEALE2_30180_raw	Lymphocyte percentage	measurement	1.9792e-12	0.150476			UKB Neale v2		349861	TRUE
NEALE2_30210_raw	Eosinophill percentage	measurement	0.00317729	-0.0160266			UKB Neale v2		349861	TRUE
NEALE2_23123_raw	Arm fat percentage (left)	measurement	8.8426e-09	0.126522			UKB Neale v2		354707	TRUE
NEALE2_23109_raw	Impedance of arm (right)	Uncategorised	5.99867e-08	0.603794			UKB Neale v2		354792	TRUE
NEALE2_30150	Eosinophill count	measurement	1.34332e-15	-0.0173689			UKB Neale v2		349856	TRUE
NEALE2_30090_raw	Platelet crit	measurement	1.83922e-07	0.000717354			UKB Neale v2		350471	TRUE
NEALE2_30010_raw	Red blood cell (erythrocyte) count	measurement	1.5083e-108	-0.0227986			UKB Neale v2		350475	TRUE
NEALE2_30270_raw	Mean sphered cell volume	Uncategorised	7.65935e-17	0.129952			UKB Neale v2		344729	TRUE
NEALE2_3064_raw	Peak expiratory flow (pef)	measurement	6.9748e-12	-2.14027			UKB Neale v2		329404	TRUE
SAIGE_272	Disorders of lipoid metabolism	Uncategorised	6.4e-11	0.0672	1.06951		UKB SAIGE	35927	408961	TRUE
SAIGE_459	Other disorders of circulatory system	cardiovascular disease	7.9e-33	0.171	1.18649		UKB SAIGE	16544	404449	TRUE
SAIGE_564_9	Personal history of diseases of digestive system	Uncategorised	0.00174	-0.0458	0.955233		UKB SAIGE	15392	350175	TRUE
SAIGE_574	Cholelithiasis and cholecystitis	gastrointestinal disease	6.55e-05	0.0577	1.0594		UKB SAIGE	16225	407532	TRUE
SAIGE_507	Pleurisy; pleural effusion	phenotype	0.000416	0.0773	1.08037		UKB SAIGE	6448	403859	TRUE
SAIGE_681_6	Cellulitis and abscess of foot, toe	infectious disease	0.000633	0.0814	1.0848		UKB SAIGE	5502	403137	TRUE
SAIGE_573_7	Abnormal results of function study of liver	Uncategorised	0.00314	0.0887	1.09275		UKB SAIGE	3479	403534	TRUE
SAIGE_418_1	Precordial pain	Uncategorised	0.00444	0.0841	1.08774		UKB SAIGE	3582	381114	TRUE
NEALE2_1448_3	Wholemeal or wholegrain | bread type	measurement	0.000429472	-0.0208861	0.97933		UKB Neale v2	147411	348424	TRUE
NEALE2_20003_1140874420	Quinine | treatment/medication code	Uncategorised	0.000305697	0.128305	1.1369		UKB Neale v2	2429	361141	TRUE
NEALE2_1697	Comparative height size at age 10	measurement	8.90684e-05	-0.00776071			UKB Neale v2		355331	TRUE
NEALE2_20153_raw	Forced expiratory volume in 1-second (fev1), predicted	measurement	0.00290669	-0.00325526			UKB Neale v2		117241	TRUE
NEALE2_23099_raw	Body fat percentage	measurement	0.00378385	0.0534757			UKB Neale v2		354628	TRUE
NEALE2_3063_raw	Forced expiratory volume in 1-second (fev1)	measurement	1.39492e-10	-0.0112069			UKB Neale v2		329404	TRUE
NEALE2_30140_raw	Neutrophill count	measurement	2.10537e-22	-0.0403825			UKB Neale v2		349856	TRUE
NEALE2_30000_raw	White blood cell (leukocyte) count	measurement	1.85813e-21	-0.056989			UKB Neale v2		350470	TRUE
NEALE2_23110_raw	Impedance of arm (left)	Uncategorised	7.00944e-10	0.705033			UKB Neale v2		354807	TRUE
NEALE2_23107_raw	Impedance of leg (right)	Uncategorised	8.99367e-08	-0.504815			UKB Neale v2		354817	TRUE
NEALE2_30110_raw	Platelet distribution width	measurement	1.19179e-15	-0.0121113			UKB Neale v2		350470	TRUE
NEALE2_4123_raw	Heel quantitative ultrasound index (qui), direct entry (right)	measurement	2.16183e-07	-0.557932			UKB Neale v2		114614	TRUE
NEALE2_30030_raw	Haematocrit percentage	Uncategorised	3.06725e-108	-0.187719			UKB Neale v2		350475	TRUE
NEALE2_3710	Length of menstrual cycle	measurement	0.00278179	-0.0257328			UKB Neale v2		32847	TRUE
NEALE2_5086_raw	Cylindrical power (left)	measurement	0.00304576	0.0134186			UKB Neale v2		77739	TRUE
NEALE2_20002_1457	Duodenal ulcer | non-cancer illness code, self-reported	gastrointestinal disease	0.00152358	-0.143357	0.866445		UKB Neale v2	1499	361141	TRUE
NEALE2_20466	Ever prescribed a medication for unusual or psychotic experiences	phenotype	0.000770768	-0.246833	0.781271		UKB Neale v2	642	5777	TRUE
SAIGE_272_1	Hyperlipidemia	Uncategorised	1.31e-10	0.0661	1.06833		UKB SAIGE	35844	408878	TRUE
SAIGE_455	Hemorrhoids	cardiovascular disease	2.43e-07	-0.0617	0.940165		UKB SAIGE	23896	393488	TRUE
SAIGE_564	Functional digestive disorders	gastrointestinal disease	0.00492	-0.0347	0.965895		UKB SAIGE	22138	356921	TRUE
SAIGE_574_1	Cholelithiasis	gastrointestinal disease	0.000174	0.0584	1.06014		UKB SAIGE	13777	405084	TRUE
SAIGE_512	Other symptoms of respiratory system	Uncategorised	0.00145	0.0595	1.06131		UKB SAIGE	9128	408961	TRUE
SAIGE_428_2	Heart failure nos	cardiovascular disease	8.89e-07	0.134	1.14339		UKB SAIGE	4269	407103	TRUE
SAIGE_575_7	Other disorders of gallbladder	gastrointestinal disease	0.00293	0.139	1.14912		UKB SAIGE	1412	392719	TRUE
NEALE2_6177_1	Cholesterol lowering medication | medication for cholesterol, blood pressure or diabetes	Uncategorised	1.84066e-10	0.0620162	1.06398		UKB Neale v2	38057	165340	TRUE
NEALE2_20528	Diagnosed with life-threatening illness	Uncategorised	0.00104565	0.0444874	1.04549		UKB Neale v2	19291	117617	TRUE
NEALE2_1468_1	Bran cereal (e.g. all bran, branflakes) | cereal type	measurement	0.000677781	-0.0289396	0.971475		UKB Neale v2	50609	299898	TRUE
NEALE2_6152_5	Blood clot in the leg (dvt) | blood clot, dvt, bronchitis, emphysema, asthma, rhinitis, eczema, allergy diagnosed by doctor	phenotype	9.46541e-55	0.319862	1.37694		UKB Neale v2	7386	360527	TRUE
NEALE2_50_raw	Standing height	measurement	6.45957e-06	-0.0828951			UKB Neale v2		360388	TRUE
NEALE2_20003_1141192410	Rosuvastatin | treatment/medication code	measurement	0.00168864	0.11658	1.12365		UKB Neale v2	2227	361141	TRUE
NEALE2_1518	Hot drink temperature	Uncategorised	0.00015569	-0.00627708			UKB Neale v2		357256	TRUE
NEALE2_1807_raw	Father's age at death	measurement	3.18388e-06	-0.200991			UKB Neale v2		266231	TRUE
NEALE2_20150_raw	Forced expiratory volume in 1-second (fev1), best measure	measurement	3.76545e-10	-0.0117932			UKB Neale v2		272338	TRUE
NEALE2_30080_raw	Platelet count	measurement	0.00127412	0.551595			UKB Neale v2		350474	TRUE
NEALE2_136	Number of operations, self-reported	Uncategorised	0.000433701	0.00786714			UKB Neale v2		361141	TRUE
NEALE2_5117_raw	6mm cylindrical power (right)	measurement	0.00372568	-0.0129564			UKB Neale v2		66256	TRUE
NEALE2_3147_raw	Heel quantitative ultrasound index (qui), direct entry	measurement	9.99134e-07	-0.393457			UKB Neale v2		206589	TRUE
SAIGE_250_2	Type 2 diabetes	Uncategorised	0.00319	0.0404	1.04123		UKB SAIGE	18945	407701	TRUE
SAIGE_459_9	Circulatory disease nec	cardiovascular disease	2.55e-33	0.173	1.18887		UKB SAIGE	16366	404271	TRUE
SAIGE_433	Cerebrovascular disease	cardiovascular disease	0.0014	0.0612	1.06311		UKB SAIGE	8742	407759	TRUE
SAIGE_531	Peptic ulcer (excl. esophageal)	Uncategorised	0.00446	-0.0591	0.942613		UKB SAIGE	7436	408961	TRUE
SAIGE_411_1	Unstable angina (intermediate coronary syndrome)	cardiovascular disease	0.0048	0.0703	1.07283		UKB SAIGE	5181	382284	TRUE
SAIGE_433_2	Occlusion of cerebral arteries	Uncategorised	0.000458	0.0967	1.10153		UKB SAIGE	4134	403151	TRUE
SAIGE_428_1	Congestive heart failure (chf) nos	Uncategorised	0.00235	0.119	1.12637		UKB SAIGE	2031	404865	TRUE
SAIGE_440	Atherosclerosis	cardiovascular disease	0.00146	0.154	1.16649		UKB SAIGE	1324	401919	TRUE
SAIGE_157	Pancreatic cancer	cell proliferation disorder	0.000562	0.249	1.28274		UKB SAIGE	589	393961	TRUE
NEALE2_20002_1065	Hypertension | non-cancer illness code, self-reported	cardiovascular disease	1.80116e-08	-0.0362994	0.964351		UKB Neale v2	93560	361141	TRUE
NEALE2_6153_1	Cholesterol lowering medication | medication for cholesterol, blood pressure, diabetes, or take exogenous hormones	Uncategorised	3.69049e-10	0.0728713	1.07559		UKB Neale v2	24247	193148	TRUE
NEALE2_6152_9	Hayfever, allergic rhinitis or eczema | blood clot, dvt, bronchitis, emphysema, asthma, rhinitis, eczema, allergy diagnosed by doctor	respiratory or thoracic disease	7.91543e-07	0.0338595	1.03444		UKB Neale v2	83407	360527	TRUE
NEALE2_6152_7	Blood clot in the lung | blood clot, dvt, bronchitis, emphysema, asthma, rhinitis, eczema, allergy diagnosed by doctor	cardiovascular disease	7.75587e-38	0.413159	1.51159		UKB Neale v2	2984	360527	TRUE
NEALE2_20002_1093	Pulmonary embolism +/- dvt | non-cancer illness code, self-reported	cardiovascular disease	1.79585e-38	0.415717	1.51546		UKB Neale v2	2999	361141	TRUE
NEALE2_4124_raw	Heel bone mineral density (bmd) (right)	measurement	1.42702e-07	-0.00356291			UKB Neale v2		114552	TRUE
NEALE2_22130	Doctor diagnosed copd (chronic obstructive pulmonary disease)	respiratory or thoracic disease	0.000718356	0.160491	1.17409		UKB Neale v2	1357	91787	TRUE
NEALE2_6147_7	Other eye condition | reason for glasses/contact lenses	Uncategorised	0.00476336	0.13915	1.1493		UKB Neale v2	1271	360677	TRUE
NEALE2_22146_raw	Age hayfever or allergic rhinitis diagnosed by doctor	respiratory or thoracic disease	9.92271e-05	-0.794295			UKB Neale v2		20904	TRUE
NEALE2_3526_raw	Mother's age at death	measurement	0.00322944	-0.140213			UKB Neale v2		213636	TRUE
NEALE2_20126_2	Bipolar ii disorder | bipolar and major depression status	nervous system disease	0.00255697	0.233303	1.26276		UKB Neale v2	508	86895	TRUE
SAIGE_562_1	Diverticulosis	Uncategorised	9.31e-07	-0.0567	0.944877		UKB SAIGE	27268	362051	TRUE
NEALE2_40001_C259	Icd10: c25.9 pancreas, unspecified | underlying (primary) cause of death	Uncategorised	6.24474e-05	0.359177	1.43215		UKB Neale v2	396	9092	TRUE
SAIGE_250	Diabetes mellitus	pancreas disease	0.00248	0.0401	1.04091		UKB SAIGE	20203	408959	TRUE
SAIGE_411_2	Myocardial infarction	cardiovascular disease	0.000723	0.0578	1.0595		UKB SAIGE	11703	388806	TRUE
SAIGE_214_1	Lipoma of skin and subcutaneous tissue	cell proliferation disorder	0.00116	0.0842	1.08785		UKB SAIGE	4611	406224	TRUE
SAIGE_477	Epistaxis or throat hemorrhage	cardiovascular disease	0.00183	-0.111	0.894939		UKB SAIGE	2456	392501	TRUE
NEALE2_20002_1387	Hayfever/allergic rhinitis | non-cancer illness code, self-reported	respiratory or thoracic disease	0.000583258	0.0429999	1.04394		UKB Neale v2	20667	361141	TRUE
NEALE2_20003_1141146234	Atorvastatin | treatment/medication code	measurement	1.08361e-06	0.0826195	1.08613		UKB Neale v2	10805	361141	TRUE
NEALE2_1418_1	Full cream | milk type used	measurement	0.00390318	-0.0343272	0.966255		UKB Neale v2	22902	360806	TRUE
NEALE2_6153_2	Blood pressure medication | medication for cholesterol, blood pressure, diabetes, or take exogenous hormones	Uncategorised	0.000241986	-0.0373084	0.963379		UKB Neale v2	33519	193148	TRUE
NEALE2_20151_raw	Forced vital capacity (fvc), best measure	measurement	5.91046e-08	-0.0124818			UKB Neale v2		272338	TRUE
NEALE2_78_raw	Heel bone mineral density (bmd) t-score, automated	measurement	9.99793e-07	-0.0222121			UKB Neale v2		206589	TRUE
NEALE2_23130_raw	Trunk predicted mass	measurement	1.15317e-05	-0.0396992			UKB Neale v2		354494	TRUE
NEALE2_20154_raw	Forced expiratory volume in 1-second (fev1), predicted percentage	measurement	0.00122643	-0.277166			UKB Neale v2		117241	TRUE
NEALE2_30300_raw	High light scatter reticulocyte count	Uncategorised	5.76001e-10	-0.000188148			UKB Neale v2		344729	TRUE
NEALE2_30060_raw	Mean corpuscular haemoglobin concentration	measurement	0.00167564	-0.00980656			UKB Neale v2		350468	TRUE
NEALE2_102_raw	Pulse rate, automated reading	measurement	7.02346e-06	-0.150912			UKB Neale v2		340162	TRUE
NEALE2_23108_raw	Impedance of leg (left)	Uncategorised	1.56828e-10	-0.603471			UKB Neale v2		354811	TRUE
NEALE2_30040_raw	Mean corpuscular volume	measurement	0.000686337	0.0436131			UKB Neale v2		350473	TRUE
NEALE2_23125_raw	Arm fat-free mass (left)	measurement	6.84763e-07	-0.00684259			UKB Neale v2		354668	TRUE
NEALE2_30250_raw	Reticulocyte count	measurement	1.86023e-11	-0.0007792			UKB Neale v2		344729	TRUE
NEALE2_3144_raw	Heel broadband ultrasound attenuation, direct entry	measurement	2.54018e-09	-0.41912			UKB Neale v2		206576	TRUE
NEALE2_20122	Bipolar disorder status	nervous system disease	0.000433876	0.378592	1.46023		UKB Neale v2	508	1064	TRUE
SAIGE_174	Breast cancer	cell proliferation disorder	0.00326	0.0478	1.04896		UKB SAIGE	12898	401447	TRUE
SAIGE_454_1	Varicose veins of lower extremity	Uncategorised	0.000294	0.0614	1.06332		UKB SAIGE	11697	381289	TRUE
SAIGE_771_1	Swelling of limb	Uncategorised	0.000506	0.0899	1.09406		UKB SAIGE	4663	408131	TRUE
SAIGE_415	Pulmonary heart disease	cardiovascular disease	6.46e-32	0.328	1.38819		UKB SAIGE	4257	406632	TRUE
SAIGE_451	Phlebitis and thrombophlebitis	cardiovascular disease	2.79e-39	0.385	1.46961		UKB SAIGE	3900	373492	TRUE
SAIGE_286_12	Congenital deficiency of other clotting factors (including factor vii)	Uncategorised	0.000376	0.354	1.42476		UKB SAIGE	305	406586	TRUE
NEALE2_20107_1	Heart disease | illnesses of father	cardiovascular disease	1.44824e-06	0.0316839	1.03219		UKB Neale v2	104110	318570	TRUE
NEALE2_20002_1094	Deep venous thrombosis (dvt) | non-cancer illness code, self-reported	phenotype	9.21791e-55	0.323101	1.38141		UKB Neale v2	7237	361141	TRUE
NEALE2_23121_raw	Arm fat-free mass (right)	measurement	1.6043e-06	-0.00614155			UKB Neale v2		354732	TRUE
NEALE2_94_raw	Diastolic blood pressure, manual reading	measurement	0.000676618	-0.349689			UKB Neale v2		31281	TRUE
NEALE2_4012_raw	Age deep-vein thrombosis (dvt, blood clot in leg) diagnosed	phenotype	0.00225599	0.742399			UKB Neale v2		6795	TRUE
NEALE2_4194_raw	Pulse rate	measurement	0.00251813	-0.174763			UKB Neale v2		118850	TRUE
NEALE2_20015_raw	Sitting height	measurement	5.43e-09	-0.0619569			UKB Neale v2		360066	TRUE
NEALE2_30130_raw	Monocyte count	measurement	1.05184e-23	-0.00644422			UKB Neale v2		349856	TRUE
NEALE2_30070_raw	Red blood cell (erythrocyte) distribution width	measurement	1.21441e-14	0.0215344			UKB Neale v2		350473	TRUE
SAIGE_366	Cataract	Uncategorised	0.00046	0.0456	1.04666		UKB SAIGE	20352	408961	TRUE
SAIGE_428	Congestive heart failure; nonhypertensive	cardiovascular disease	2.35e-06	0.115	1.12187		UKB SAIGE	5415	408249	TRUE
SAIGE_531_3	Duodenal ulcer	gastrointestinal disease	9.29e-06	-0.145	0.865022		UKB SAIGE	3002	404527	TRUE
SAIGE_578_2	Blood in stool	Uncategorised	0.0012	-0.112	0.894044		UKB SAIGE	2639	387796	TRUE
SAIGE_454_11	Varicose veins of lower extremity, symptomtic	phenotype	0.000141	0.265	1.30343		UKB SAIGE	633	370225	TRUE
SAIGE_286_11	Von willebrand's disease	hematologic disease	0.0048	-0.499	0.607137		UKB SAIGE	98	406379	TRUE
NEALE2_20003_1140861958	Simvastatin | treatment/medication code	Uncategorised	3.46811e-09	0.0525828	1.05399		UKB Neale v2	40921	361141	TRUE
NEALE2_20002_1473	High cholesterol | non-cancer illness code, self-reported	phenotype	9.11216e-17	0.0721414	1.07481		UKB Neale v2	43957	361141	TRUE
NEALE2_6152_100	None of the above | blood clot, dvt, bronchitis, emphysema, asthma, rhinitis, eczema, allergy diagnosed by doctor	Uncategorised	4.34276e-19	-0.0554812	0.94603		UKB Neale v2	116005	360527	TRUE
NEALE2_1835	Mother still alive	Uncategorised	0.00160625	-0.0161388	0.983991		UKB Neale v2	140246	355029	TRUE
NEALE2_2178	Overall health rating	Uncategorised	0.00103762	0.00691986			UKB Neale v2		359681	TRUE
NEALE2_30240_raw	Reticulocyte percentage	measurement	0.000105644	-0.0104739			UKB Neale v2		344728	TRUE
NEALE2_23127_raw	Trunk fat percentage	measurement	8.52648e-05	0.0828911			UKB Neale v2		354619	TRUE
NEALE2_4196_raw	Pulse wave peak to peak time	measurement	0.00289728	1.06433			UKB Neale v2		118787	TRUE
NEALE2_3148_raw	Heel bone mineral density (bmd)	measurement	9.08664e-07	-0.00248721			UKB Neale v2		206496	TRUE
NEALE2_2385	Relative age voice broke	measurement	0.00167548	0.00444867			UKB Neale v2		154459	TRUE
NEALE2_23129_raw	Trunk fat-free mass	measurement	1.51787e-05	-0.0408316			UKB Neale v2		354530	TRUE
NEALE2_1458	Cereal intake	Uncategorised	1.57578e-05	-0.0107081			UKB Neale v2		345019	TRUE
NEALE2_3062_raw	Forced vital capacity (fvc)	measurement	2.84819e-10	-0.014284			UKB Neale v2		329404	TRUE
NEALE2_1598	Average weekly spirits intake	measurement	0.00270099	0.00909253			UKB Neale v2		257426	TRUE
SAIGE_578	Gastrointestinal hemorrhage	phenotype	0.00117	-0.0398	0.960982		UKB SAIGE	21137	406294	TRUE
SAIGE_745	Pain in joint	phenotype	0.00133	0.0637	1.06577		UKB SAIGE	8037	408961	TRUE
SAIGE_366_2	Senile cataract	disease of visual system	0.000139	0.0752	1.0781		UKB SAIGE	8369	396978	TRUE
SAIGE_773	Pain in limb	phenotype	5.08e-06	0.102	1.10738		UKB SAIGE	6327	408961	TRUE
SAIGE_681_3	Cellulitis and abscess of arm/hand	infectious disease	0.000625	0.0812	1.08459		UKB SAIGE	5539	403174	TRUE
SAIGE_575	Other biliary tract disease	gastrointestinal disease	2.1e-05	0.121	1.12862		UKB SAIGE	3892	395199	TRUE
SAIGE_572	Ascites (non malignant)	phenotype	0.00049	0.155	1.16766		UKB SAIGE	1547	401602	TRUE
SAIGE_386_1	Meniere's disease	disease of ear	0.00202	0.225	1.25232		UKB SAIGE	578	403405	TRUE
SAIGE_290_11	Alzheimer's disease	Uncategorised	0.00103	0.287	1.33242		UKB SAIGE	404	402787	TRUE
SAIGE_500_2	Pneumoconiosis	Uncategorised	0.0017	0.361	1.43476		UKB SAIGE	234	397645	TRUE
NEALE2_6154_1	Aspirin | medication for pain relief, constipation, heartburn	Uncategorised	5.21134e-06	0.0371401	1.03784		UKB Neale v2	50204	357084	TRUE
NEALE2_2257	Hearing difficulty/problems with background noise	phenotype	0.00480712	-0.0168336	0.983307		UKB Neale v2	134141	353983	TRUE
NEALE2_6154_3	Paracetamol | medication for pain relief, constipation, heartburn	Uncategorised	4.43141e-05	-0.0286841	0.971723		UKB Neale v2	77936	357084	TRUE
NEALE2_20003_1140888266	Warfarin | treatment/medication code	measurement	5.03134e-08	0.157873	1.17102		UKB Neale v2	3651	361141	TRUE
NEALE2_30260_raw	Mean reticulocyte volume	Uncategorised	2.73254e-23	0.229053			UKB Neale v2		344728	TRUE
NEALE2_47_raw	Hand grip strength (right)	measurement	1.10805e-07	-0.116683			UKB Neale v2		359729	TRUE
NEALE2_23126_raw	Arm predicted mass (left)	measurement	6.98986e-07	-0.0064306			UKB Neale v2		354653	TRUE
NEALE2_30020_raw	Haemoglobin concentration	measurement	1.69065e-127	-0.0691884			UKB Neale v2		350474	TRUE
NEALE2_5119_raw	3mm cylindrical power (left)	measurement	0.000301716	-0.0151909			UKB Neale v2		75398	TRUE
NEALE2_23119_raw	Arm fat percentage (right)	measurement	3.84591e-08	0.119878			UKB Neale v2		354760	TRUE
NEALE2_4125_raw	Heel bone mineral density (bmd) t-score, automated (right)	measurement	2.16089e-07	-0.0314987			UKB Neale v2		114614	TRUE
NEALE2_30200_raw	Neutrophill percentage	measurement	7.9438e-05	-0.0973819			UKB Neale v2		349861	TRUE
NEALE2_135	Number of self-reported non-cancer illnesses	Uncategorised	0.000916299	0.0077108			UKB Neale v2		361141	TRUE
SAIGE_418	Nonspecific chest pain	phenotype	0.000245	0.0388	1.03956		UKB SAIGE	31429	408961	TRUE
SAIGE_272_11	Hypercholesterolemia	phenotype	1.15e-10	0.0684	1.07079		UKB SAIGE	33242	406276	TRUE
SAIGE_562	Diverticulosis and diverticulitis	gastrointestinal disease	1.04e-06	-0.0565	0.945066		UKB SAIGE	27311	362094	TRUE
SAIGE_411	Ischemic heart disease	cardiovascular disease	0.00123	0.0357	1.03634		UKB SAIGE	31355	408458	TRUE
NEALE2_20003_1141151284	Naratriptan | treatment/medication code	measurement	0.000112653	-0.408048	0.664947		UKB Neale v2	274	361141	TRUE
SAIGE_454	Varicose veins	phenotype	0.000111	0.0643	1.06641		UKB SAIGE	12172	381764	TRUE
SAIGE_681	Superficial cellulitis and abscess	infectious disease	0.000412	0.0726	1.0753		UKB SAIGE	7451	405086	TRUE
SAIGE_681_5	Cellulitis and abscess of leg, except foot	infectious disease	0.000494	0.0826	1.08611		UKB SAIGE	5547	403182	TRUE
SAIGE_451_2	Phlebitis and thrombophlebitis of lower extremities	Uncategorised	3.36e-41	0.413	1.51135		UKB SAIGE	3587	373179	TRUE
SAIGE_575_2	Obstruction of bile duct	gastrointestinal disease	0.00351	0.184	1.20202		UKB SAIGE	777	392084	TRUE

## Sheet: S6-PheWAS-BMI-FABP4
Table S6. PheWAS search for GWAS associations of cis-pQTL of FABP4 (rs77878271) with compex traits. Anthropometric traits are denoted in bold. Associations with bmi are highlighted in red.
Study ID	Trait	Trait Category	P-value	Beta	Odds Ratio	PMID	Author (Year)	N Cases	N Overall	Has sumstats
NEALE2_1289	Cooked vegetable intake	measurement	0.000215902	-0.0222076			UKB Neale v2		350404	TRUE
NEALE2_2375	Relative age of first facial hair	measurement	0.0013891	0.0169233			UKB Neale v2		161470	TRUE
FINNGEN_R6_CD2_BENIGN_TONGUE	Benign neoplasm: Tongue	cell proliferation disorder	0.00205	0.44233	1.55633		FINNGEN_R6	434	260405	TRUE
FINNGEN_R6_C3_URINARY_TRACT_EXALLC	Malignant neoplasm of urinary organs (controls excluding all cancers)	cell proliferation disorder	0.00104	0.17801	1.19484		FINNGEN_R6	3209	207279	TRUE
FINNGEN_R6_AB1_STREPTO_SEPSIS	Streptococcal septicaemia	infectious disease	0.00122	-0.26697	0.765696		FINNGEN_R6	1316	236071	TRUE
NEALE2_20003_1140866122	Bendrofluazide | treatment/medication code	measurement	0.00233366	-0.337637	0.713454		UKB Neale v2	1922	361141	TRUE
NEALE2_30100_raw	Mean platelet (thrombocyte) volume	measurement	0.00438456	-0.0251584			UKB Neale v2		350470	TRUE
NEALE2_1080	Time spent using computer	Uncategorised	0.00139046	-0.0225833			UKB Neale v2		280750	TRUE
FINNGEN_R6_CD2_BENIGN_MELANOCYTIC_EYELID	Melanocytic naevi of eyelid	including canthus""	Uncategorised	0.00166	0.80101	2.22779		FINNGEN_R6	144	260405	TRUE
FINNGEN_R6_CD2_BENIGN_LIPO_SKIN_LIMBS_EXALLC	Benign lipomatous neoplasm of skin and subcutaneous tissue of limbs (controls excluding all cancers)	cell proliferation disorder	0.00107	0.26889	1.30851		FINNGEN_R6	1318	209491	TRUE
NEALE2_20003_1140879494	Metoclopramide | treatment/medication code	measurement	0.00311255	0.683959	1.98171		UKB Neale v2	441	361141	TRUE
FINNGEN_R6_CD2_INSITU_SKIN_UPPERLIMB_EXALLC	Carcinoma in situ of skin of upper limb	including shoulder (controls excluding all cancers)""	cell proliferation disorder	0.000763	0.6969	2.00752		FINNGEN_R6	211	209283	TRUE
NEALE2_102250	Sweet snack consumers	measurement	0.00458121	0.123847	1.13184		UKB Neale v2	23524	51427	TRUE
NEALE2_1160	Sleep duration	measurement	0.000149933	-0.0234507			UKB Neale v2		359020	TRUE
FINNGEN_R6_R18_OTHER_ABNORMAL_FINDI_URINE	Other abnormal findings in urine	phenotype	0.00438	0.5777	1.78194		FINNGEN_R6	219	259891	TRUE
FINNGEN_R6_ST19_OTHER_INJURI_UPPER_LIMB_LEVEL_UNSPE	Other injuries of upper limb	level unspecified""	injury, poisoning or other complication	0.0037	0.78131	2.18433		FINNGEN_R6	124	259279	TRUE
FINNGEN_R6_C3_URINARY_TRACT	Malignant neoplasm of urinary organs	cell proliferation disorder	0.00154	0.16924	1.1844		FINNGEN_R6	3209	260405	TRUE
NEALE2_5158_raw	6mm asymmetry index (right)	measurement	0.00448438	-0.661538			UKB Neale v2		41390	TRUE
NEALE2_22146_raw	Age hayfever or allergic rhinitis diagnosed by doctor	respiratory or thoracic disease	0.00118755	1.88802			UKB Neale v2		20904	TRUE
FINNGEN_R6_M13_ARTHROSIS	Arthrosis	Uncategorised	0.00459	0.05318	1.05462		FINNGEN_R6	45467	218881	TRUE
FINNGEN_R6_CD2_BENIGN_LIPO_SKIN_LIMBS	Benign lipomatous neoplasm of skin and subcutaneous tissue of limbs	cell proliferation disorder	0.00127	0.264	1.30213		FINNGEN_R6	1318	260405	TRUE
NEALE2_6151_5	Wrist | fractured bone site(s)	Uncategorised	0.000383832	-0.204749	0.814852		UKB Neale v2	7200	359241	TRUE
FINNGEN_R6_CD2_BENIGN_TONGUE_EXALLC	Benign neoplasm: Tongue (controls excluding all cancers)	cell proliferation disorder	0.00176	0.45032	1.56881		FINNGEN_R6	434	209276	TRUE
NEALE2_1329	Oily fish intake	measurement	0.00112801	-0.0238944			UKB Neale v2		359340	TRUE
FINNGEN_R6_CD2_BENIGN_MELANOCYTIC_EYELID_EXALLC	Melanocytic naevi of eyelid	including canthus (controls excluding all cancers)""	Uncategorised	0.0016	0.80464	2.23589		FINNGEN_R6	144	209183	TRUE
FINNGEN_R6_M13_ARTHROSIS_INCLAVO	Artrosis	including avohilmo""	Uncategorised	0.00451	0.04777	1.04893		FINNGEN_R6	57873	260405	TRUE
FINNGEN_R6_K11_OTHENTERCOL	Other noninfective gastroenteritis and colitis	gastrointestinal disease	0.00145	0.1393	1.14947		FINNGEN_R6	4737	254442	TRUE
NEALE2_5160_raw	3mm regularity index (right)	measurement	0.00334881	-0.0739603			UKB Neale v2		74059	TRUE
FINNGEN_R6_CD2_INSITU_SKIN_UPPERLIMB	Carcinoma in situ of skin of upper limb	including shoulder""	cell proliferation disorder	0.000923	0.67895	1.97181		FINNGEN_R6	211	260405	TRUE
NEALE2_20003_1140883568	Oxybutynin | treatment/medication code	measurement	0.00176458	-0.52845	0.589518		UKB Neale v2	827	361141	TRUE
GCST90012075	Fatty acid-binding protein, adipocyte levels	measurement	6.446e-14	-0.2598		PMID:33067605	Folkersen L		21758	TRUE
NEALE2_20003_1141150624	Zomig 2.5mg tablet | treatment/medication code	measurement	0.00448012	0.738908	2.09365		UKB Neale v2	349	361141	TRUE
GCST90002409	Childhood body mass index	measurement	0.0001376	0.0863		PMID:33045005	Vogelezang S		39620	TRUE

## Sheet: S7-PheWAS-BMI-NECTIN2
Table S7. PheWAS search for GWAS associations of cis-pQTL of NECTIN- like protein 2 (rs11215406) with compex traits. Anthropometric traits are denoted in bold. Associations with bmi are highlighted in red.
Study ID	Trait	Trait Category	P-value	Beta	Odds Ratio	PMID	Author (Year)	N Cases	N Overall	Has sumstats
NEALE2_22612_1	Sometimes | worked with materials containing asbestos	Uncategorised	0.00401836	-0.0496696	0.951544		UKB Neale v2	8397	77361	TRUE
NEALE2_22606_0	Rarely/never | workplace very noisy	Uncategorised	0.00227933	0.0385938	1.03935		UKB Neale v2	21382	90897	TRUE
NEALE2_20111_100	None of the above (group 1) | illnesses of siblings	Uncategorised	0.00484418	0.0179955	1.01816		UKB Neale v2	91010	281979	TRUE
NEALE2_20117_0	Never | alcohol drinker status	biological process	0.00110913	-0.0502214	0.951019		UKB Neale v2	11243	360726	TRUE
NEALE2_2714	Age when periods started (menarche)	measurement	2.66968e-08	0.0151503			UKB Neale v2		188644	TRUE
NEALE2_20015_raw	Sitting height	measurement	0.000976841	0.0323596			UKB Neale v2		360066	TRUE
NEALE2_21001_raw	Body mass index (bmi)	measurement	4.59202e-06	-0.0583149			UKB Neale v2		359983	TRUE
NEALE2_1687	Comparative body size at age 10	Uncategorised	4.5475e-08	-0.0100297			UKB Neale v2		354996	TRUE
GCST90002412	Low density lipoprotein cholesterol levels	measurement	6.5e-05	-0.00873545		PMID:32493714	Klimentidis YC		431167	TRUE
FINNGEN_R6_INFLUENZA	All influenza (not pneumonia)	infectious disease	0.000368	-0.10222	0.902831		FINNGEN_R6	3226	226813	TRUE
FINNGEN_R6_J10_PLEUREFFUSION	Pleural effusion	phenotype	0.00395	-0.09578	0.908664		FINNGEN_R6	2401	254345	TRUE
NEALE2_6162_4	Cycle | types of transport used (excluding work)	Uncategorised	0.00316502	0.0303848	1.03085		UKB Neale v2	26059	359324	TRUE
NEALE2_6152_9	Hayfever, allergic rhinitis or eczema | blood clot, dvt, bronchitis, emphysema, asthma, rhinitis, eczema, allergy diagnosed by doctor	respiratory or thoracic disease	0.00204888	0.0195346	1.01973		UKB Neale v2	83407	360527	TRUE
NEALE2_4123_raw	Heel quantitative ultrasound index (qui), direct entry (right)	measurement	3.16214e-10	0.629067			UKB Neale v2		114614	TRUE
NEALE2_4124_raw	Heel bone mineral density (bmd) (right)	measurement	1.28309e-10	0.00404589			UKB Neale v2		114552	TRUE
NEALE2_4120_raw	Heel broadband ultrasound attenuation (right)	measurement	3.78302e-08	0.483114			UKB Neale v2		114609	TRUE
SAIGE_850	Hemorrhage or hematoma complicating a procedure	Uncategorised	0.00147	-0.0712	0.931276		UKB SAIGE	5329	400258	TRUE
GCST009983	Trauma exposure in major depressive disorder	measurement	0.00179473	0.0849476	1.08866	PMID:31969693	Coleman JRI	13393	22880	TRUE
GCST002783	Body mass index	measurement	0.0003695	-0.0146		PMID:25673413	Locke AE		238944	TRUE
FINNGEN_R6_H8_HL_MIX_NAS	Mixed conductive and sensorineural hearing loss	nervous system disease	0.00368	0.09963	1.10476		FINNGEN_R6	2263	235669	TRUE
FINNGEN_R6_L12_LYMPHADENITIS	Acute lymphadenitis	phenotype	0.000178	0.17443	1.19057		FINNGEN_R6	1200	249027	TRUE
FINNGEN_R6_L12_PRURITUS	Pruritus	phenotype	0.00299	0.11819	1.12546		FINNGEN_R6	1645	237806	TRUE
NEALE2_3144_raw	Heel broadband ultrasound attenuation, direct entry	measurement	1.41811e-12	0.459858			UKB Neale v2		206576	TRUE
NEALE2_4277	Volume level set by participant (right)	Uncategorised	0.00281586	-0.298933			UKB Neale v2		116755	TRUE
NEALE2_78_raw	Heel bone mineral density (bmd) t-score, automated	measurement	7.48937e-11	0.0272908			UKB Neale v2		206589	TRUE
NEALE2_50_raw	Standing height	measurement	0.000131306	0.064939			UKB Neale v2		360388	TRUE
FINNGEN_R6_Z21_ROUTI_GENERAL_HEALTH_CHECK_DEFIN_SUBPO	Routine general health check-up of defined subpopulation	Uncategorised	0.000776	0.25665	1.29259		FINNGEN_R6	461	137627	TRUE
NEALE2_20074_raw	Home location at assessment - east co-ordinate (rounded)	Uncategorised	0.00263225	503.794			UKB Neale v2		357793	TRUE
FINNGEN_R6_CD2_BENIGN_BLADDER_EXALLC	Benign neoplasm: Bladder (controls excluding all cancers)	cell proliferation disorder	0.00313	-0.40247	0.668666		FINNGEN_R6	141	209222	TRUE
FINNGEN_R6_CD2_BENIGN_BLADDER	Benign neoplasm: Bladder	cell proliferation disorder	0.00349	-0.39775	0.67183		FINNGEN_R6	141	260405	TRUE
NEALE2_20002_1192	Renal/kidney failure | non-cancer illness code, self-reported	phenotype	0.00046815	0.432383	1.54092		UKB Neale v2	171	361141	TRUE
GCST90019392	Complement component C8 gamma chain measurement	measurement	0.00325	0.0446		PMID:33328453	Pietzner M		10708	TRUE
SAIGE_159_3	Malignant neoplasm of gallbladder and extrahepatic bile ducts	cell proliferation disorder	0.00192	-0.359	0.698374		UKB SAIGE	196	393568	TRUE
FINNGEN_R6_N14_OVARYCYST	Ovarian cyst	phenotype	0.00403	0.0454	1.04645		FINNGEN_R6	13096	94689	TRUE
FINNGEN_R6_N14_BENIGNMAMDYSP	Benign mammary dysplasia	reproductive system or breast disease	0.00164	0.09404	1.0986		FINNGEN_R6	3031	139645	TRUE
FINNGEN_R6_I9_OTH	Other CVD	cardiovascular disease	0.00118	-0.09955	0.905245		FINNGEN_R6	2834	260405	TRUE
NEALE2_6150_2	Angina | vascular/heart problems diagnosed by doctor	phenotype	0.00149905	-0.0482306	0.952914		UKB Neale v2	11372	360420	TRUE
NEALE2_2335	Chest pain or discomfort	phenotype	0.0015938	-0.0233867	0.976885		UKB Neale v2	56233	357507	TRUE
GCST006288	Heel bone mineral density	measurement	4.4e-18	0.0326485		PMID:28869591	Kemp JP		142487	TRUE
NEALE2_23108_raw	Impedance of leg (left)	Uncategorised	1.20577e-08	0.496626			UKB Neale v2		354811	TRUE
NEALE2_30210_raw	Eosinophill percentage	measurement	0.00319506	0.0148			UKB Neale v2		349861	TRUE
NEALE2_23123_raw	Arm fat percentage (left)	measurement	0.00271343	-0.060948			UKB Neale v2		354707	TRUE
NEALE2_23104_raw	Body mass index (bmi)	measurement	9.89396e-06	-0.0564531			UKB Neale v2		354831	TRUE
FINNGEN_R6_H7_ANISOMETROPIA	Anisometropia and aniseikonia	disease of visual system	0.00125	0.24638	1.27939		FINNGEN_R6	443	251387	TRUE
GCST006979	Heel bone mineral density	measurement	1.4e-38	0.0282416		PMID:30598549	Morris JA		426824	TRUE
NEALE2_1070	Time spent watching television (tv)	Uncategorised	0.000791059	-0.00683105			UKB Neale v2		341859	TRUE
NEALE2_20003_1141146612	Calceos chewable tablet | treatment/medication code	measurement	0.00454073	-0.321833	0.724819		UKB Neale v2	203	361141	TRUE
NEALE2_20003_1140874138	Ciprofloxacin | treatment/medication code	Uncategorised	0.000452923	0.477359	1.61181		UKB Neale v2	141	361141	TRUE
GCST90026098	5,6-dihydrothymine levels	measurement	0.004651	0.0268		PMID:33437055	Panyard DJ		291	TRUE
FINNGEN_R6_K11_HERING	Inguinal hernia	phenotype	0.000344	0.04742	1.04856		FINNGEN_R6	20538	246824	TRUE
NEALE2_6153_1	Cholesterol lowering medication | medication for cholesterol, blood pressure, diabetes, or take exogenous hormones	Uncategorised	0.000488927	-0.0373947	0.963296		UKB Neale v2	24247	193148	TRUE
NEALE2_20002_1226	Hypothyroidism/myxoedema | non-cancer illness code, self-reported	Uncategorised	0.00457505	-0.0349926	0.965613		UKB Neale v2	17574	361141	TRUE
NEALE2_6143_3	Public transport | transport type for commuting to job workplace	Uncategorised	0.00214759	0.0278598	1.02825		UKB Neale v2	39655	190832	TRUE
NEALE2_6152_100	None of the above | blood clot, dvt, bronchitis, emphysema, asthma, rhinitis, eczema, allergy diagnosed by doctor	Uncategorised	0.00438842	-0.0163577	0.983775		UKB Neale v2	116005	360527	TRUE
NEALE2_23113_raw	Leg fat-free mass (right)	measurement	0.00162729	-0.01027			UKB Neale v2		354798	TRUE
NEALE2_24019_raw	Particulate matter air pollution (pm10); 2007	measurement	0.00275533	0.0214967			UKB Neale v2		355245	TRUE
NEALE2_3147_raw	Heel quantitative ultrasound index (qui), direct entry	measurement	7.47052e-11	0.483434			UKB Neale v2		206589	TRUE
NEALE2_20003_1140860834	Glyceryl trinitrate | treatment/medication code	measurement	0.00490962	-0.136407	0.872488		UKB Neale v2	1111	361141	TRUE
GCST90006887	Chlamydia trachomatis momp A antibody levels	measurement	0.000397965	-0.183697		PMID:33204752	Butler-Laporte G		964	TRUE
GCST001475	Obesity	Uncategorised	0.0009488	-0.1034	0.901766	PMID:22484627	Bradfield JP	5530	13848	TRUE
NEALE2_23120_raw	Arm fat mass (right)	measurement	0.0027549	-0.00497363			UKB Neale v2		354736	TRUE
NEALE2_1329	Oily fish intake	measurement	0.00150377	0.00774804			UKB Neale v2		359340	TRUE
NEALE2_23118_raw	Leg predicted mass (left)	measurement	0.0042377	-0.00875993			UKB Neale v2		354766	TRUE
NEALE2_23124_raw	Arm fat mass (left)	measurement	0.00208974	-0.00571271			UKB Neale v2		354673	TRUE
NEALE2_1100	Drive faster than motorway speed limit	Uncategorised	0.0025026	-0.00664269			UKB Neale v2		327192	TRUE
NEALE2_20003_1140860954	Isosorbide mononitrate | treatment/medication code	measurement	0.00499754	-0.131582	0.876707		UKB Neale v2	1189	361141	TRUE
NEALE2_5959	Previously smoked cigarettes on most/all days	biological process	0.00392373	-0.227363	0.796632		UKB Neale v2	660	2005	TRUE
NEALE2_20003_1141191748	Respiratory mometasone | treatment/medication code	measurement	0.00420416	0.314801	1.36999		UKB Neale v2	216	361141	TRUE
SAIGE_245	Thyroiditis	endocrine system disease	0.00279	0.283	1.32711		UKB SAIGE	293	391722	TRUE
GCST90019399	Gelsolin measurement	measurement	0.002173	0.0469		PMID:33328453	Pietzner M		10708	TRUE
GCST90019436	Antithrombin-III measurement	measurement	0.00221	0.0467		PMID:33328453	Pietzner M		10708	TRUE
GCST90011494	TestASV_18 (Prevotella) abundance	measurement	0.00195235	0.17186		PMID:33462482	Ruhlemann MC		8956	TRUE
GCST005353	GLP-1-stimulated insulin secretion	measurement	0.000774668	-0.4494		PMID:29293525	Gudmundsdottir V		79	TRUE
FINNGEN_R6_E4_OBESITY_HYPER	Obesity and other hyperalimentation	Uncategorised	0.00388	-0.04828	0.952867		FINNGEN_R6	11555	260405	TRUE
FINNGEN_R6_J10_INFLUENZA	All influenza	infectious disease	0.000512	-0.07894	0.924095		FINNGEN_R6	5193	228780	TRUE
NEALE2_20002_1074	Angina | non-cancer illness code, self-reported	phenotype	0.000716061	-0.0514021	0.949897		UKB Neale v2	11370	361141	TRUE
NEALE2_20003_1140884600	Metformin | treatment/medication code	Uncategorised	0.00111495	-0.0560891	0.945455		UKB Neale v2	8968	361141	TRUE
NEALE2_23106_raw	Impedance of whole body	Uncategorised	1.81879e-08	1.01271			UKB Neale v2		354795	TRUE
NEALE2_23114_raw	Leg predicted mass (right)	measurement	0.00185123	-0.00951395			UKB Neale v2		354798	TRUE
NEALE2_23110_raw	Impedance of arm (left)	Uncategorised	6.35978e-06	0.476925			UKB Neale v2		354807	TRUE
NEALE2_23117_raw	Leg fat-free mass (left)	measurement	0.00420432	-0.00935066			UKB Neale v2		354771	TRUE
NEALE2_20507	Recent feelings of inadequacy	Uncategorised	0.00295433	0.00828029			UKB Neale v2		117502	TRUE
NEALE2_4125_raw	Heel bone mineral density (bmd) t-score, automated (right)	measurement	3.16061e-10	0.0355147			UKB Neale v2		114614	TRUE
NEALE2_20003_1140888386	Iron product | treatment/medication code	measurement	0.00240001	0.154554	1.16714		UKB Neale v2	1009	361141	TRUE
SAIGE_418	Nonspecific chest pain	phenotype	0.00379	-0.0282	0.972194		UKB SAIGE	31429	408961	TRUE
NEALE2_22128	Doctor diagnosed emphysema	respiratory or thoracic disease	0.00277803	-0.291095	0.747445		UKB Neale v2	276	91787	TRUE
GCST90038609	Angina	phenotype	0.0032	-0.0012038	0.998797	PMID:33959723	Donertas HM	15527	484598	TRUE
GCST009980	Major depressive disorder in trauma exposed individuals	nervous system disease	4.42385e-05	0.106583	1.11247	PMID:31969693	Coleman JRI	13393	24094	TRUE
SAIGE_696	Psoriasis and related disorders	Uncategorised	0.00457	0.0963	1.10109		UKB SAIGE	2293	400492	TRUE
GCST90011347	G_Sutterella abundance	measurement	0.000240565	-0.0908088		PMID:33462482	Ruhlemann MC		8956	TRUE
GCST90019433	Complement C2 measurement	measurement	0.004447	-0.0436		PMID:33328453	Pietzner M		10708	TRUE
GCST90026087	3-methoxytyrosine levels	measurement	0.003329	-0.0933		PMID:33437055	Panyard DJ		291	TRUE
FINNGEN_R6_E4_OBESITY	Obesity	Uncategorised	0.00278	-0.05013	0.951106		FINNGEN_R6	11483	260333	TRUE
FINNGEN_R6_E4_NUTRIDEF	Other nutritional deficiencies	Uncategorised	0.00423	-0.0468	0.954278		FINNGEN_R6	11852	260405	TRUE
NEALE2_3148_raw	Heel bone mineral density (bmd)	measurement	3.05144e-11	0.00310668			UKB Neale v2		206496	TRUE
NEALE2_23107_raw	Impedance of leg (right)	Uncategorised	6.7636e-09	0.505768			UKB Neale v2		354817	TRUE
NEALE2_23109_raw	Impedance of arm (right)	Uncategorised	6.36637e-07	0.512686			UKB Neale v2		354792	TRUE
NEALE2_24018_raw	Nitrogen dioxide air pollution; 2007	measurement	0.00288811	0.0801461			UKB Neale v2		356078	TRUE
GCST90000493	Stem cell factor levels	measurement	0.0043517	-0.14612		PMID:32641083	Hillary RF		982	TRUE
GCST90000450	CD244 levels	measurement	0.0035571	-0.14937		PMID:32641083	Hillary RF		982	TRUE
GCST90002409	Childhood body mass index	measurement	4.788e-06	-0.0391		PMID:33045005	Vogelezang S		39620	TRUE

## Sheet: S8-MR-Replication
Table S8. Replication MR for candidate protein for adult BMI or using independent exposure GWAS
SNP	Outcome	Exposure	Study	Method	Number.SNPs	MR Beta	MR SE	MR Pval	effect_allele.exposure	other_allele.exposure	effect_allele.outcome	other_allele.outcome	beta.exposure	beta.outcome	eaf.exposure	eaf.outcome	remove	palindromic	ambiguous	id.outcome	pval.outcome	se.outcome	outcome	mr_keep.outcome	pval_origin.outcome	se.exposure	pval.exposure	exposure	mr_keep.exposure	pval_origin.exposure	id.exposure	action	mr_keep	samplesize.outcome
rs4837181	BMI	ENG	Emilsson	Wald ratio	1	0.0904494	0.0458801	0.0486749	C	A	C	A	-0.534	-0.0483	0.982		FALSE	FALSE	FALSE	BMI	0.0483	0.0245	outcome	TRUE	reported	0.092	8.3e-09	exposure	TRUE	reported	ENG	2	TRUE
rs11215406	Adult BMI	Nectin-like protein 2	Ferkingstad	Wald ratio	1	-0.08	0.0133333	1.97318e-09	C	T	C	T	0.15	-0.012		0.2505	FALSE	FALSE	FALSE	Adult BMI	9.8e-10	0.002	outcome	TRUE	reported	0.00856526	1.14815e-68	exposure	TRUE	reported	Nectin-like protein 2	2	TRUE
rs651007	Adult BMI	ENG	Suhre	Wald ratio	1	0.00652985	0.00391791	0.0955807	C	T	C	T	-0.536	-0.0035	0.23	0.784	FALSE	FALSE	FALSE	Adult BMI	0.1	0.0021	outcome	TRUE	reported	0.049	6e-26	exposure	TRUE	reported	ENG	2	TRUE
rs11794565	BMI	Endoglin	Sun UKB	Wald ratio	1	0.0208494	0.0316602	0.510193	C	T	C	T	0.259	0.0054	0.46		FALSE	FALSE	FALSE	BMI	0.5117	0.0082	outcome	TRUE	reported	0.008	1e-200	exposure	TRUE	reported	Endoglin	2	TRUE

## Sheet: S9-Reverse MR-BMI
Table S9. Reverse MR studying the association of pediaric BMI with the levels of two of th three candidate proteins.
Method	Number of SNPs	Beta	Standard Error	P-value	Cohran-Q	Cohran-Q p-val	MR-Egger Interecept	MR-Egger intercept p-value
Fatty Acid Binding Protein 4 (FABP4)
IVW	16	0.24762	0.0411698	1.8033e-09	15.6044	0.40882
Weighted median	16	0.280624	0.058794	1.81491959840335E-06
Weighted mode	16	0.326494	0.0843448	0.0015080229036469
MR Egger	16	0.63367	0.188329	0.00462669864363081	11.2001	0.670249	-0.0280689	0.0544702
Nectin-like protein 2
IVW	25	0.0275896	0.0356164	0.438558	37.1311	0.04246
Weighted median	25	0.0314897	0.0423922	0.457592
Weighted mode	25	0.0702161	0.0571178	0.230868
MR Egger	25	0.0604635	0.154137	0.698469	37.0535	0.0320968	-0.00228913	0.828223
Significant p-values are denoted in bold

## Sheet: S10-Two Step-MR
Table S10. Two-step network MR using colocalization-prioritized proteins, BFPC and BMI.
SNP	Protien	MR Protein - BMI					MR Protein - BFPC					BFPC - BMI					Mediation
		method	nsnp	beta	se	pval	method	nsnp	beta1	se	pval	method	nsnp	beta2	se	pval	Indirect Effect	se3	CI 95%		pval3
rs8354	FABP4	Wald ratio	1	-0.331923	0.0869231	0.00013422	Wald ratio	1	0.392308	0.278812	0.159406	Inverse variance weighted	3	1.50962	1.95789	0.440681	0.592234	0.875856	-1.12441	2.30888	0.498928
rs131798	ENG	Wald ratio	1	-0.0716418	0.0175373	4.40566e-05	Wald ratio	1	-0.15584	0.0486381	0.00135501	Inverse variance weighted	3	1.50962	1.95789	0.440681	-0.235258	0.313827	-0.850347	0.379831	0.45347
rs4679138	Nectin like protien 2	Wald ratio	1	-0.260667	0.0573333	5.45424e-06	Wald ratio	1	-0.230227	0.16114	0.15308	Inverse variance weighted	3	1.50962	1.95789	0.440681	-0.347554	0.512209	-1.35146	0.656357	0.49743
Indirect Effect = beta1 * beta2
se3 and pval3 estimate with Sobel test

[truncated: 4 more sheets: S11-GeneMania, S12-Metascape, S13-Fuma, S14-Drug]
